# Supplementary material
Source: PubMed Central journal article supplement (PMC7770564)
Supplement: bloodBLD2020006513-suppl1.pdf [file bloodBLD2020006513-suppl1.pdf]

1 **Supplemental information**

2

3 ***VAV1* mutations contribute to development of T-cell neoplasms in mice**

4

5 Kota Fukumoto<sup>1</sup>, Mamiko Sakata-Yanagimoto<sup>1,2,3</sup>, Manabu Fujisawa<sup>1</sup>, Tatsuhiro Sakamoto<sup>1,3</sup>,  
6 Hiroaki Miyoshi<sup>4</sup>, Yasuhito Suehara<sup>1</sup>, Tran B. Nguyen<sup>1</sup>, Sakurako Suma<sup>1</sup>, Shintaro Yanagimoto<sup>5</sup>,  
7 Yuichi Shiraishi<sup>6</sup>, Kenichi Chiba<sup>6</sup>, Alyssa Bouska<sup>7</sup>, Keisuke Kataoka<sup>8,9</sup>, Seishi Ogawa<sup>8</sup>, Javeed  
8 Iqbal<sup>7</sup>, Koichi Ohshima<sup>4</sup>, and Shigeru Chiba<sup>1,2,3</sup>

9

10 <sup>1</sup> *Department of Hematology, Comprehensive Human Biosciences, University of Tsukuba.*

11 <sup>2</sup> *Department of Hematology, Faculty of Medicine, University of Tsukuba.*

12 <sup>3</sup> *Department of Hematology, University of Tsukuba Hospital.*

13 <sup>4</sup> *Department of Pathology, School of Medicine, Kurume University.*

14 <sup>5</sup> *Division for Health Service Promotion, University of Tokyo.*

15 <sup>6</sup> *Division of Cellular Signaling, National Cancer Center Research Institute.*

16 <sup>7</sup> *Department of Pathology and Microbiology, University of Nebraska Medical Center.*

17 <sup>8</sup> *Department of Pathology and Tumor Biology, Graduate School of Medicine, Kyoto University.*

18 <sup>9</sup> *Division of Molecular Oncology, National Cancer Center Research Institute.*

19

20 **Supplementary Methods**

21 **Supplementary Figures and Figure Legends**

22 **Supplemental Tables**

23

## 24 **Supplemental Methods**

### 25 **Mice**

26 All mice were maintained in specific pathogen-free conditions at the Laboratory Animal Resource  
27 Center of the University of Tsukuba. All experiments were performed according to guidelines of  
28 the Laboratory Animal Resource Center. *p53*<sup>-/-</sup> mice were provided by the RIKEN BioResource  
29 Center Acc. No.CDB 0001K (Tsukada, 1993 #730). BALB/c-nu (CAnN.Cg-*Foxn1*<sup>nu</sup>/CrIcrlj,  
30 nude) mice were from Charles River Laboratory. Six genotypes of mice, including wild-type  
31 (WT), VAV1 mutant (V-Del or V-Fus) transgenic mice (*VAV1-Tg*), *Trp53*<sup>+/-</sup> mice (*p53*<sup>+/-</sup>), *Trp53*<sup>-</sup>  
32 <sup>-</sup> mice (*p53*<sup>-/-</sup>), *p53*<sup>+/-</sup> *VAV1-Tg*, and *p53*<sup>-/-</sup> *VAV1-Tg* (*p53*<sup>-/-</sup> V-Del or *p53*<sup>-/-</sup> V-Fus) were analyzed  
33 around 4 weeks of age. These mice were performed genomic polymerase chain reaction (PCR)  
34 of tail DNA to confirm transduction of the VAV1 mutant and *Trp53* loss, as shown in Figure S1d.  
35 Primers for VAV1 are 5'-GGCTGAGGCTGAACAGAACTGGTGG-3' (forward) and 5'-  
36 CAGGCTCCTTGAAGGGGAAGTCAA-3' (reverse). Primers for *Trp53* are 5'-  
37 GTTATGCATCCATACAGTACA (forward) and 5'- CAGGATATCTTCTGGAGGAAG-3'  
38 (reverse).

39

### 40 **Primary mouse tumor cells**

41 Mice were sacrificed by cervical dislocation. Single cell suspensions from thymus, spleen, and  
42 abdominal lymph nodes were prepared in five ml phosphate-buffered saline supplemented with  
43 2.5% fetal calf serum (Staining Medium; SM). Cells were washed in SM and centrifuged at 410  
44 × g for 5 minutes at 4°C, subjected to NH<sub>4</sub>Cl lysis to eliminate erythrocytes, resuspended in  
45 SM, and passed through a 70 μm cell strainer (Falcon, NY, USA). Cells were analyzed by  
46 FACS Aria II (Beckton Dickinson). Remaining cells were transplanted into nude mice to  
47 confirm cell autonomous activity and stored in CELL BANKER 1 plus (ZENOAQ

48 RESOURCE) or RLT Buffer (Qiagen) at -80°C prior to performing whole transcriptome  
49 analysis (WTA) and whole exome sequencing (WES).

50

### 51 **Quantitative PCR**

52 cDNA synthesis from total RNAs was performed with SuperScript III First-Strand Synthesis  
53 System for RT-PCR (ThermoFisher SCIENTIFIC) according to the manufacturer's instructions.  
54 Taqman Gene Expression Assays (Applied Biosystems) and FastStart Universal Probe Master  
55 (ROX) were used in each experiment. cDNA libraries were subjected to 7500 Fast System  
56 (Applied Biosystems) and analyzed using 7500 software. Relative expression was normalized to  
57 values of 18S rRNA. All assays were performed three times for each biological replicate.

58

### 59 **Histology**

60 Tissues were fixed in 10% formaldehyde in 0.01 mol/L phosphate-buffered saline solution (pH  
61 7.2), paraffin-embedded, cut in 5µm sections and stained with hematoxylin and eosin (HE).  
62 Immunohistochemical analysis for CD3, CD4, CD8, CD45R, and phosphoVAV1 was  
63 performed on FFPE tissue sections. Sections were activated by Tris-EDTA (pH 9.0) for 20-40  
64 minutes at room temperature (RT) and then incubated with primary antibodies against mouse-  
65 CD3 antibody (1:50, Clone: SP7, Cat. No. ab16669, abcam) for 60 minutes at RT, -CD4  
66 antibody (1:500, Clone: EPR19514, Cat. ab183685, abcam) for 60 minutes at RT, -CD8a  
67 antibody (1:500, Clone: EPR20305, Cat. No. ab209775, abcam) for 30 minutes at RT, -CD45R  
68 (B220) biotinylated antibody (1:400, Clone: RA3-6B2, Cat. No. 553085, BD) for 30 minutes at  
69 RT, or -phospho-VAV1 (Tyr174) antibody (1:100, Clone: polyclonal Cat. PA5-36699,  
70 Thermofisher scientific) for overnight at 4°C. Secondary antibodies were EnVision+ System-  
71 HRP, Labelled Polymer (Rabbit) (DAKO) for anti -CD3, -CD4, and -CD8a antibody incubated

72 30 minutes at RT, ImmPRESS HRP Anti-Rat IgG Polymer (VECTOR) for anti -CD45R (B220)  
73 incubated 30 minutes at RT, and SignalStain Boost IHC Detection Reagent (HRP.Rabbit) (CST)  
74 for anti -phospho-VAV1 (Tyr174) incubated 30 minutes at RT. HE and  
75 immunohistochemically-stained sections were photographed with a Keyence BZ X710  
76 microscope (Keyence Corporation, Osaka, Japan).

77 Other tissues were fixed in 4% paraformaldehyde for 5 hours at 4°C and then  
78 embedded in OCT compound (Sakura Finetek Japan Co., Tokyo, Japan) at -80 °C. OCT blocks  
79 were sliced into 5 µm sections using a cryostat and then incubated with primary antibodies  
80 against mouse-CD3 (1:500, Clone: 17A2, Cat. No. 100201, BioLegend), and -cMyc antibody  
81 (1:100, Cat. No. ab32072, Abcam) at 4 °C overnight. All secondary antibodies were diluted  
82 1:2000 and incubated with sections at RT for 60 minutes. After incubation with DAPI  
83 (Vectashield Mounting Medium; Vector laboratories, CA, USA), stained samples were  
84 photographed with a Leica TCS SP5 confocal laser scanning microscope (Leica Microsystems,  
85 Wetzlar, Germany).

86

### 87 **T cell receptor (TCR) stimulation**

88 Naïve T cells were sorted from splenocytes using EasySep Mouse Naïve T Cell Isolation Kit  
89 (VERITAS). Sorted naïve T cells were cultured in RPMI-1640 (Sigma) supplemented with 10%  
90 FCS, 1% Penicillin-Streptomycin-L-glutamine (Wako), 1% sodium pyruvate (gibco), 1%  
91 nonessential amino acids (gibco), 1% HEPES (gibco), 50µM 2-MercaptoEthanol (Wako), and  
92 recombinant mouse interleukin-2 (20 ng/ml) (Wako). TCR were stimulated 2 hours by  
93 PMA/Ionomycin for checking phospho-VAV1 or 8 days Dynabeads Mouse T-activator  
94 CD3/CD28 (VERITAS) for checking transcription factor GATA3.

95

96 **Flow cytometry**

97 Single cell suspensions of tissues were stained with combinations of phycoerythrin - Cyanin 7-  
98 (PE-Cy7, Cat. No. 25-0042-82) labeled antibody to CD4; fluorescein isothiocyanate- (FITC,  
99 Cat. No. 11-0081-82), or allophycocyanin- (APC, Cat. No. 17-0081-82) labeled antibodies to  
100 CD8a; phycoerythrin-labeled (PE, Cat. No. 12-0031-82) antibody to CD3e; PE-labeled (Cat.  
101 No. 12-5961-82) antibody to TCR $\beta$ ; APC-labeled (Cat. No. 17-0242-82) antibody to CD24;  
102 FITC-labeled (Cat. No. 11-0441-82) antibody to CD44; PE-labeled (Cat. No. 12-9981-82)  
103 antibody to CD279 (PD-1); FITC-labeled (Cat. No. 11-9949-82) antibody to CD278 (ICOS);  
104 APC-labeled (Cat. No. 17-0621-82) antibody to CD62L (L-Selectin); PE-labeled (Cat. No. 12-  
105 0251-82) antibody to CD25; or perinidin chlorophyll-labeled (PerCP, Cat. No. 00-6993-50)  
106 antibody to 7AAD. Cells were also stained using Phosflow Lyse/Fix Buffer (BD) and  
107 Phosflow Perm Buffer III (BD) with Alexa Fluor 488-labeled (Cat. Ab237470) antibody to  
108 VAV1 (phosphor Y174) or Foxp3/Transcription Factor Staining Buffer Set (eBioscience) with  
109 Alexa Fluor 488-labeled (Cat. 53-9966-42) antibody to GATA3. Stained cells were analyzed  
110 using a FACS Aria II or III flow cytometer (BD Biosciences) and data were analyzed using  
111 FlowJo software.

112 We defined tumors as immature T-cell neoplasms (TCN) corresponding to human T-  
113 lymphoblastic lymphoma (T-LBL) when thymuses were enlarged and tumor cells exhibited  
114 TCR $\beta$ <sup>low</sup> CD24<sup>+</sup> cell-surface patterns, indicative of immature T cells; by contrast, we defined  
115 TCN (Lym) as mature when spleens were enlarged and tumor cells exhibited TCR $\beta$ <sup>high</sup> CD24<sup>-</sup>  
116 cell-surface patterns indicative of mature T cells.

117

118 **Mouse tumor transplantation**

119  $2 \times 10^7$  cells of a single cell suspension prepared from whole thymocytes of T-LBL tumor or  
120 whole splenocytes of Lym tumor were intraperitoneally injected into 5-week-old nude mice that  
121 had undergone 2 Gy irradiation before injection. Tumor cell engraftment was checked in  
122 peripheral blood at 14 days after transplantation and defined as a percentage of donor H-2K<sup>b</sup>  
123 (MHC class I alloantigen of C57BL/6 mice, Cat. No. 116606) -positive cells > 0.01% of  
124 peripheral blood mononuclear cells.

125

### 126 **Whole transcriptome analysis (WTA)**

127 Total RNAs were extracted from fresh frozen cells using the RNeasy mini kit (Qiagen). RNA  
128 integrity number (RIN) values and size distribution and concentration of libraries were  
129 examined using the Agilent 2100 Bioanalyzer (Agilent). Sequencing reads were mapped on the  
130 mm10 mouse reference genome and quantified using CLC Genomics Workbench version 9.5.1  
131 (Qiagen, Hilden, Germany). Normalized to reads per kilobase of exon per million mapped  
132 sequence reads (RPKM) were estimated for each gene and filtered by the Empirical Analysis of  
133 Digital Gene Expression tool. To identify significantly enriched pathways in each group, Gene  
134 Set Enrichment Analysis (GSEA: v.4.0.1) <sup>1,2</sup> (<https://www.gsea-msigdb.org/gsea/index.jsp>) with  
135 the Molecular Signatures Database (MSigDB) gene sets (hallmark and C2: v7.0) was performed  
136 for genes expressed at >1 RPKM in two or more samples. Gene Ontology enrichment analysis  
137 was performed using Metascape <sup>3</sup> (<https://metascape.org/gp/index.html#/main/step1>).

138

### 139 **Whole exome sequencing (WES)**

140 Genomic DNAs were extracted from fresh frozen tumor cells using QIAamp DNA Blood Mini  
141 Kit (Qiagen). DNA integrity number (DIN) values were examined using Agilent TapeStation  
142 2200 (Agilent). Libraries were made using SureSelect XT Mouse All Exon kits (Agilent

143 Technologies). Sequencing was performed by standard 150 bp paired-end protocol. The  
144 Genomon2 pipeline (<https://github.com/Genomon-Project>) was used for sequence alignment  
145 and mutation calling. Putative somatic mutations with Fisher's exact  $P$ -value  $<0.01$  and an EB  
146 call  $P$ -value  $>2.0$  were adopted. Mapping errors were excluded by visual inspection with  
147 Integrative Genomics Viewer (IGV) (<http://software.broadinstitute.org/software/igv/>). Copy  
148 number analysis using WES data were performed using CopywriteR  
149 (<https://github.com/PeeperLab/CopywriteR>). Significant focal CNVs for CopywriteR output  
150 were identified using GISTIC 2.0 software ([https://github.com/genepattern/GISTIC\\_2.0](https://github.com/genepattern/GISTIC_2.0)).

151

#### 152 **Protocol for mouse injections**

153 Cells were harvested from whole splenocytes of tumor-bearing nude mice that had been  
154 transplanted with T-LBL or Lym tumors and then intraperitoneally injected again into 2 Gy-  
155 irradiated nude mice. JQ1 (Selleck chemicals) at 3 mg/kg body weight or vehicle was  
156 intraperitoneally injected once every two days from day 7. As diluent we used 2 % DMSO/30 %  
157 PEG300/5 % Tween 80 in distilled water (Wako).

158

Supplementary Figure 1

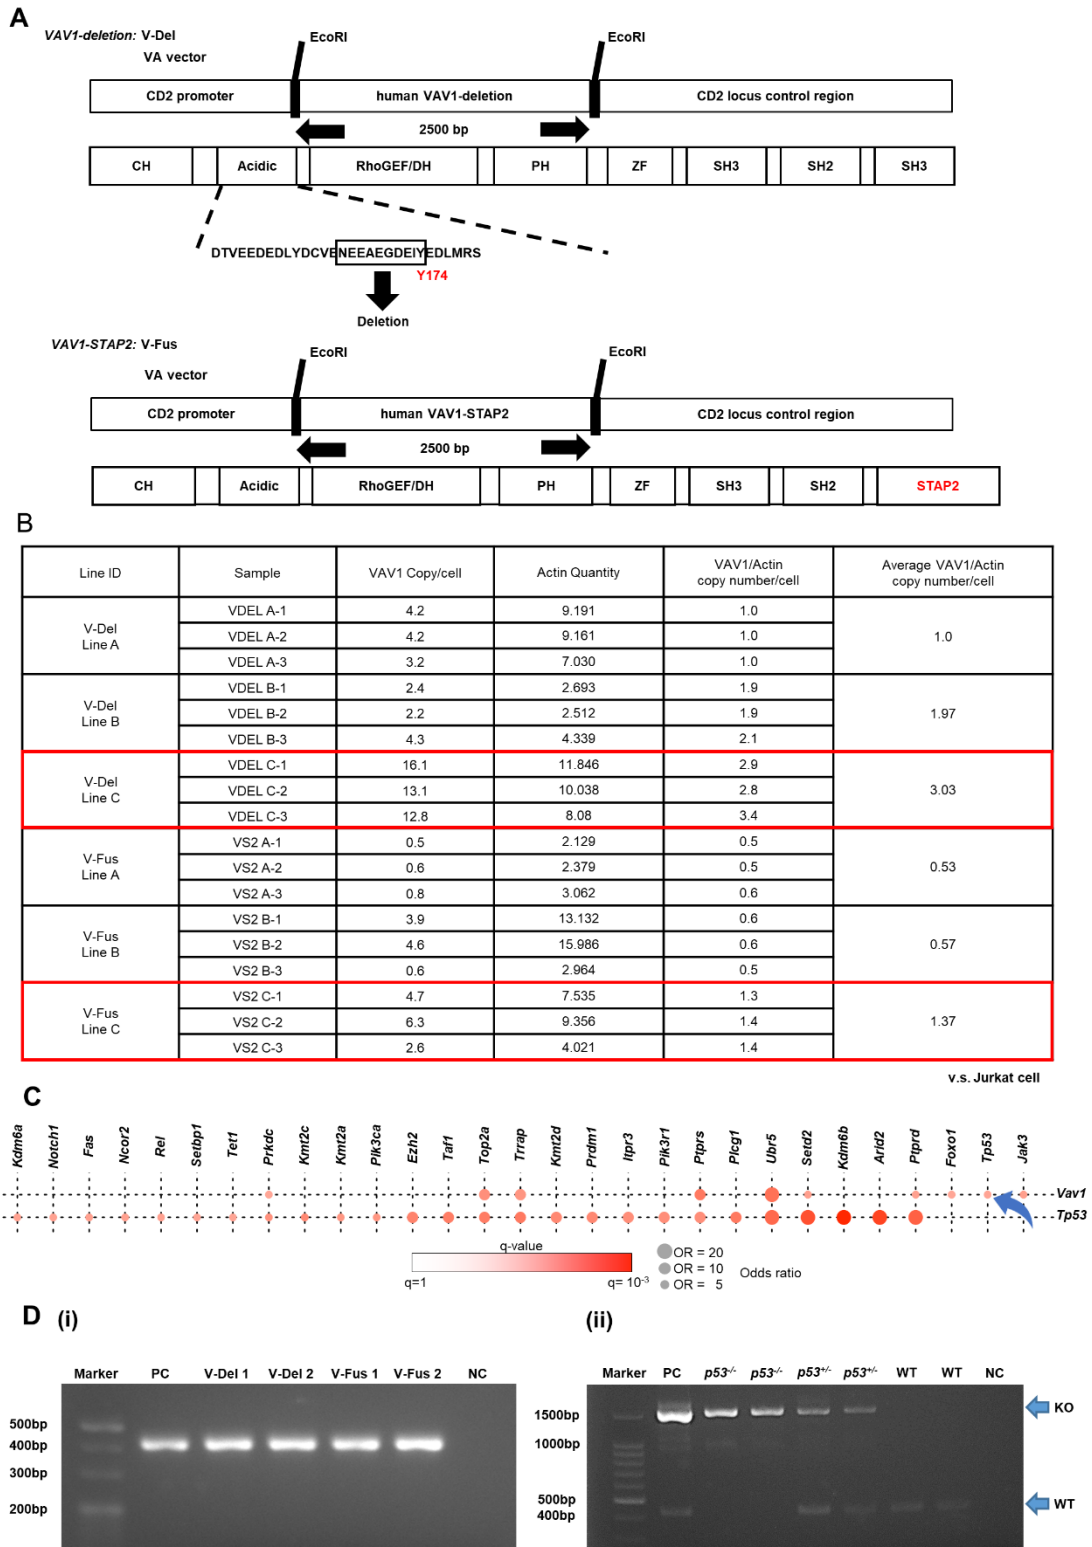

159

160

Supplementary Figure 1: Generation of VAV1 mutant-expressing mice on a *p53*-null



161 **background.**

162 A. Structure of VA vector constructs harboring human *VAV1*- $\Delta$ 165-174 (V-Del) and *VAV1*-  
163 *STAP2* (V-Fus) cDNAs driven by the *CD2* promoter.

164 B. Average copy number of human *VAV1* mutant transgenes, as detected by analysis of tail  
165 DNAs from three lines (Lines A, B, and C) of V-Del or V-Fus mice. Line C from each  
166 genotype was used for subsequent analyses. Amplification values were normalized to those  
167 of mouse *Actin*, a housekeeping gene.

168 C. Alterations in *TP53* and *VAV1* in PTCLs <sup>4</sup>. Pairwise correlations between mutations were  
169 assessed using a pairwise Fisher's exact test with Benjamini-Hochberg correction ( $q < 0.1$ ).

170 D. Genomic PCR analysis of (i) human V-Del and V-Fus transgenes, and (ii) bands indicative  
171 of *Trp53* deletion in tail DNA from mice with conventional *Trp53* knockout ( $p53^{-/-}$ ) or  $p53^{+/-}$   
172 mice expressing V-Del or V-Fus transgenes ( $p53^{-/-}$  V-Del or  $p53^{-/-}$  V-Fus mice) at 4 weeks of  
173 age. N=2 for each. KO, knockout; WT, wild type; PC, positive control; NC, negative control.

174

## Supplementary Figure 2

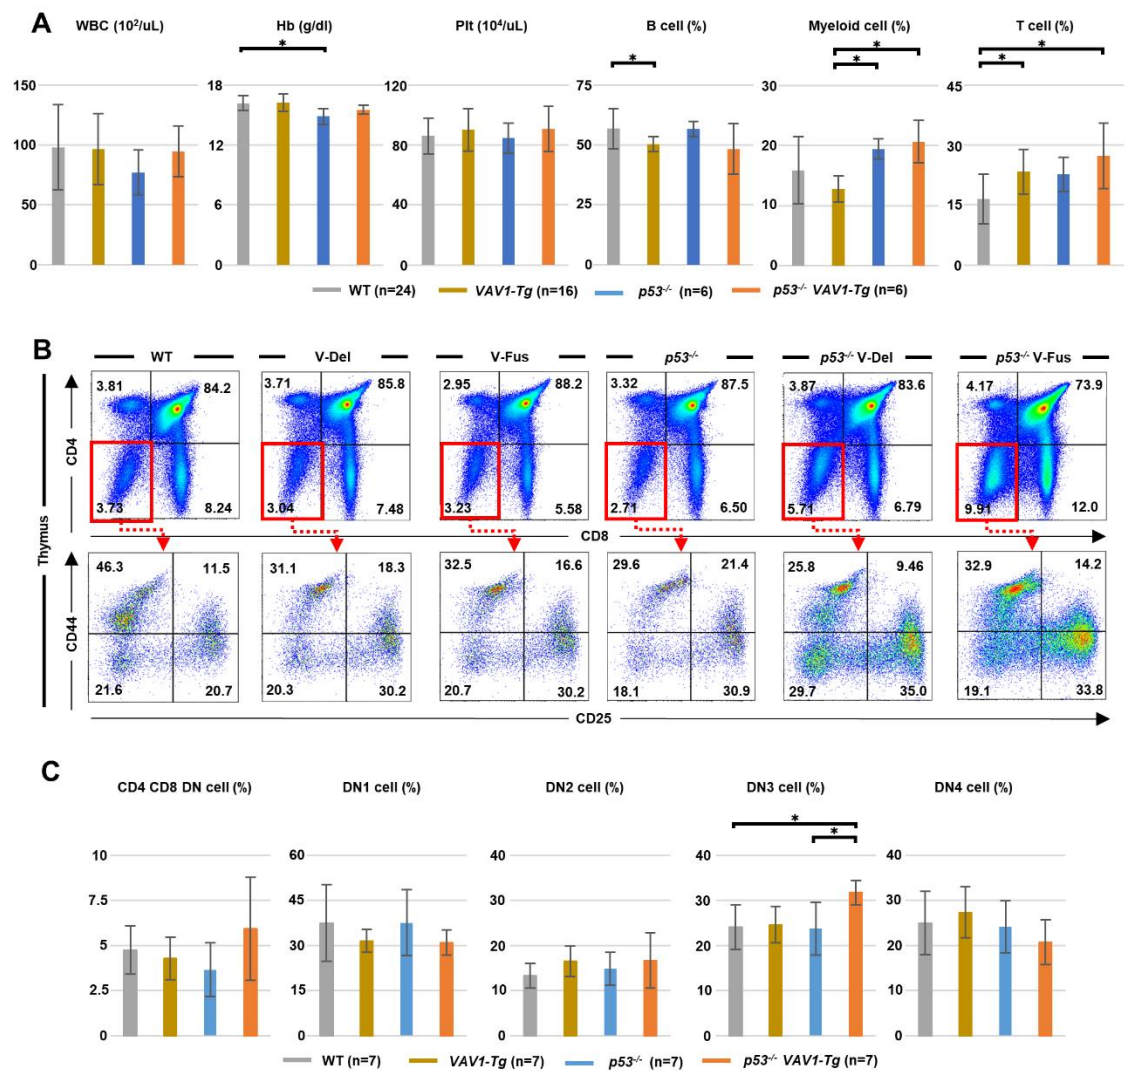

175

176 **Supplementary Figure 2: Function of VAV1 mutants in physiological T-cell differentiation.**

177 A. White blood cells (WBC), hemoglobin (Hb), and platelet (Plt) counts in peripheral blood  
 178 (PB), and percentages of B, Myeloid, and T cells based on flow cytometric analysis of mice  
 179 of indicated genotypes. The number of mice analyzed 24 WT, 16 *VAV1-Tg*, 6  $p53^{-/-}$ , and 6  
 180  $p53^{-/-}$  *VAV1-Tg* mice. \* indicates  $p < 0.05$ .

181 B. Representative data analyzing CD4- and CD8- double negative (DN) thymocytes from  
 182 indicated mice at 12 weeks of age. DN1 is characterized by  $CD44^+CD25^-$ , DN2 by  
 183  $CD44^+CD25^+$ , DN3 by  $CD44^-CD25^+$ , and DN4 by  $CD44^-CD25^-$ .

184 C. Shown are the percentage of the DN fraction and percentages of DN1, DN2, DN3, and DN4  
185 cells in the DN fraction (right 4 graphs). The number of mice analyzed is as follows: WT,  
186 n=7; *VAV1-Tg*, n=7; *p53<sup>-/-</sup>*, n=7; *p53<sup>-/-</sup> VAV1-Tg*, n=7. \* indicates  $p < 0.05$ .  
187

Supplementary Figure 3

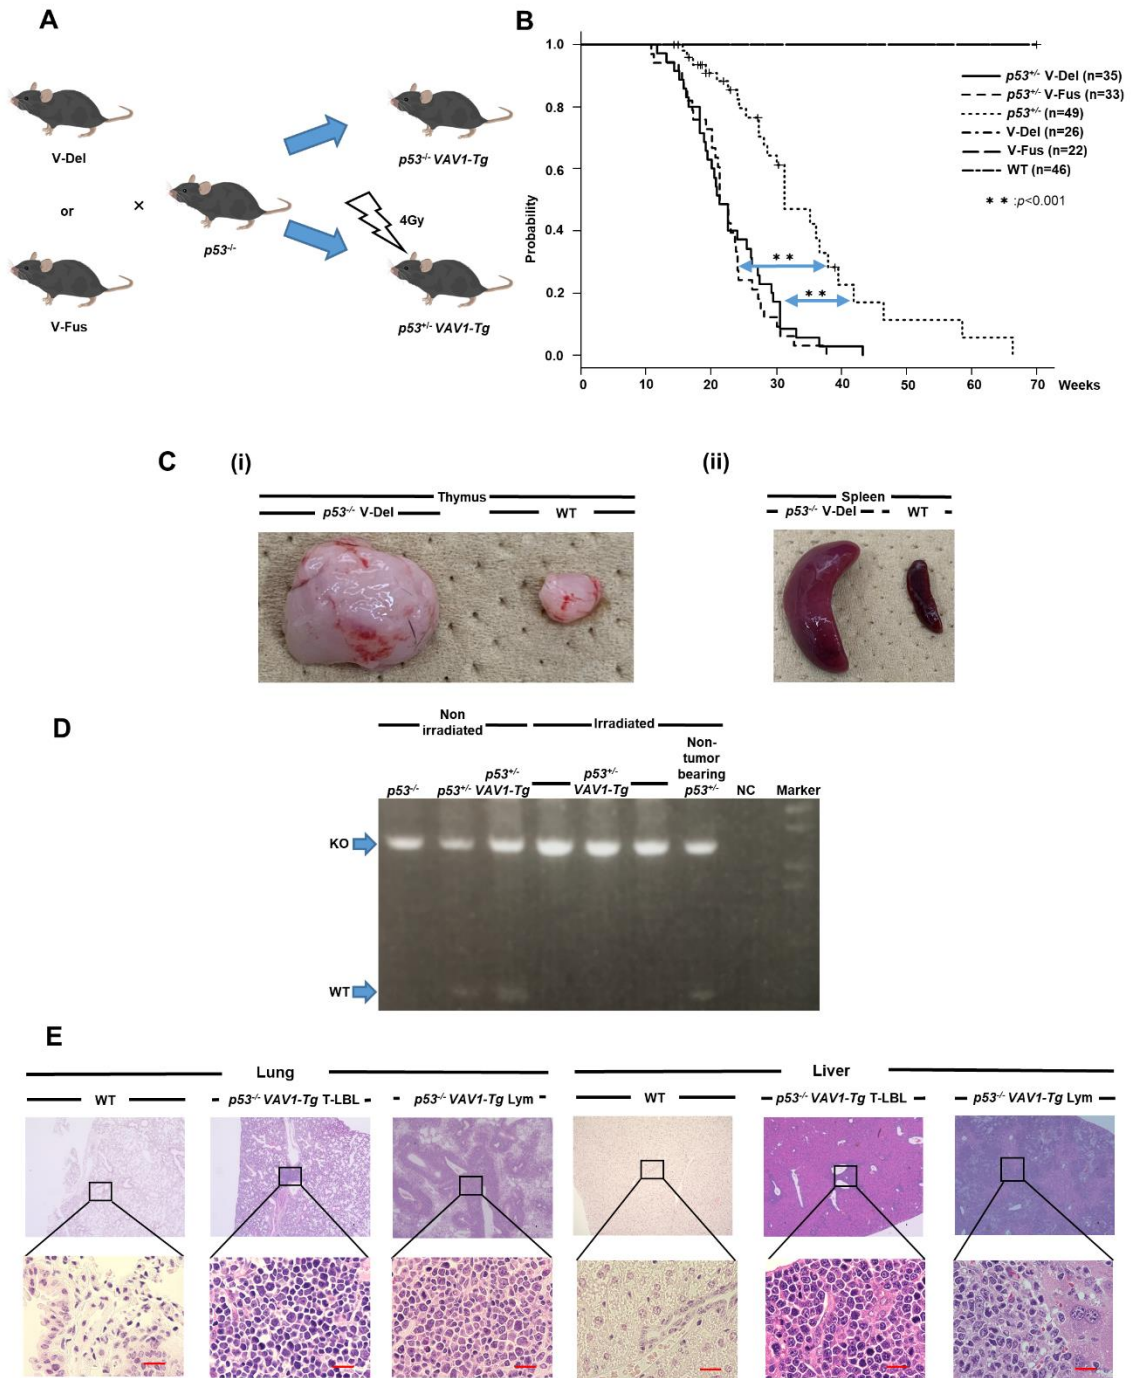

188

189 **Supplementary Figure 3, related to Figure 3: Function of *VAV1* mutations in tumorigenicity.**

190 A. Schematic showing generation of mouse models. Two *VAV1-Tg* mice lines, V-Del and V-Fus,

191 were crossed with  $p53^{-/-}$  or  $p53^{+/+}$  mice to generate  $p53^{-/-}$  *VAV1-Tg* ( $p53^{-/-}$  V-Del or  $p53^{-/-}$  V-

192 Fus mice) and  $p53^{+/-}$  *VAV1-Tg* mice ( $p53^{+/-}$  V-Del or  $p53^{+/-}$  V-Fus mice). We observed the  
193 natural course of tumor development in  $p53^{-/-}$  *VAV1-Tg* mice, and also we irradiated  $p53^{+/-}$   
194 *VAV1-Tg* mice with 4Gy at 8 weeks of age.

195 B. Overall survival of mice of indicated genotypes after irradiation. Shown are results derived  
196 from  $p53^{+/-}$  V-Del and  $p53^{+/-}$  V-Fus mice, as well as  $p53^{+/-}$  mice, *VAV1-Tg* mice on a WT  
197 background (V-Del and V-Fus mice), or WT mice. Both types of  $p53^{+/-}$  *VAV1-Tg* mice  
198 showed significantly shorter survival after 4 Gy irradiation than did  $p53^{+/-}$  mice, *VAV1-Tg*  
199 mice on a WT background, and WT mice.

200 C. Macroscopic analysis of representative thymuses (i) at 12 weeks of age and spleens (ii) at 24  
201 weeks of age from tumor-bearing  $p53^{-/-}$  V-Del or WT mice.

202 D. Genomic PCR analysis of *Trp53* for genomic DNA extracted from T-LBL tumor cells of  
203 irradiated  $p53^{+/-}$  *VAV1-Tg* mice (n=3). PC, positive control; NC, negative control.

204 E. Hematoxylin eosin (HE)-stained sections of indicated tissues from WT and  $p53^{-/-}$  *VAV1-Tg* mice.  
205 Both T-LBL and Lym tumor cells massively infiltrated lung and liver tissue. Lower  
206 magnification is x4 and higher magnification is x100. The length of scale bars is 20  $\mu$ m.

207

Supplementary Figure 4

**A**

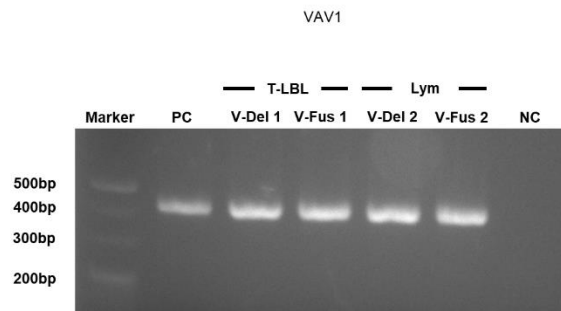

**B**

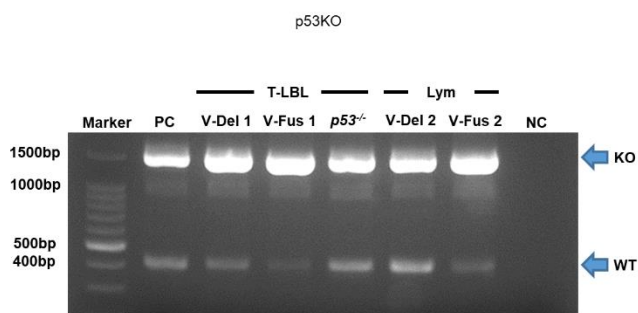

208

209 **Supplementary Figure 4, related to Figure 4: Characteristics of engrafted nude mice**

210 Genomic PCR analysis of (A) human V-Del and V-Fus transgenes, and (B) bands indicative of

211 *Trp53* deletion in genomic DNA extracted from tumors of nude mice transplanted with donor

212 tumor cells from indicated samples. n=1 each. PC, positive control; NC, negative control.

213

Supplementary Figure 5

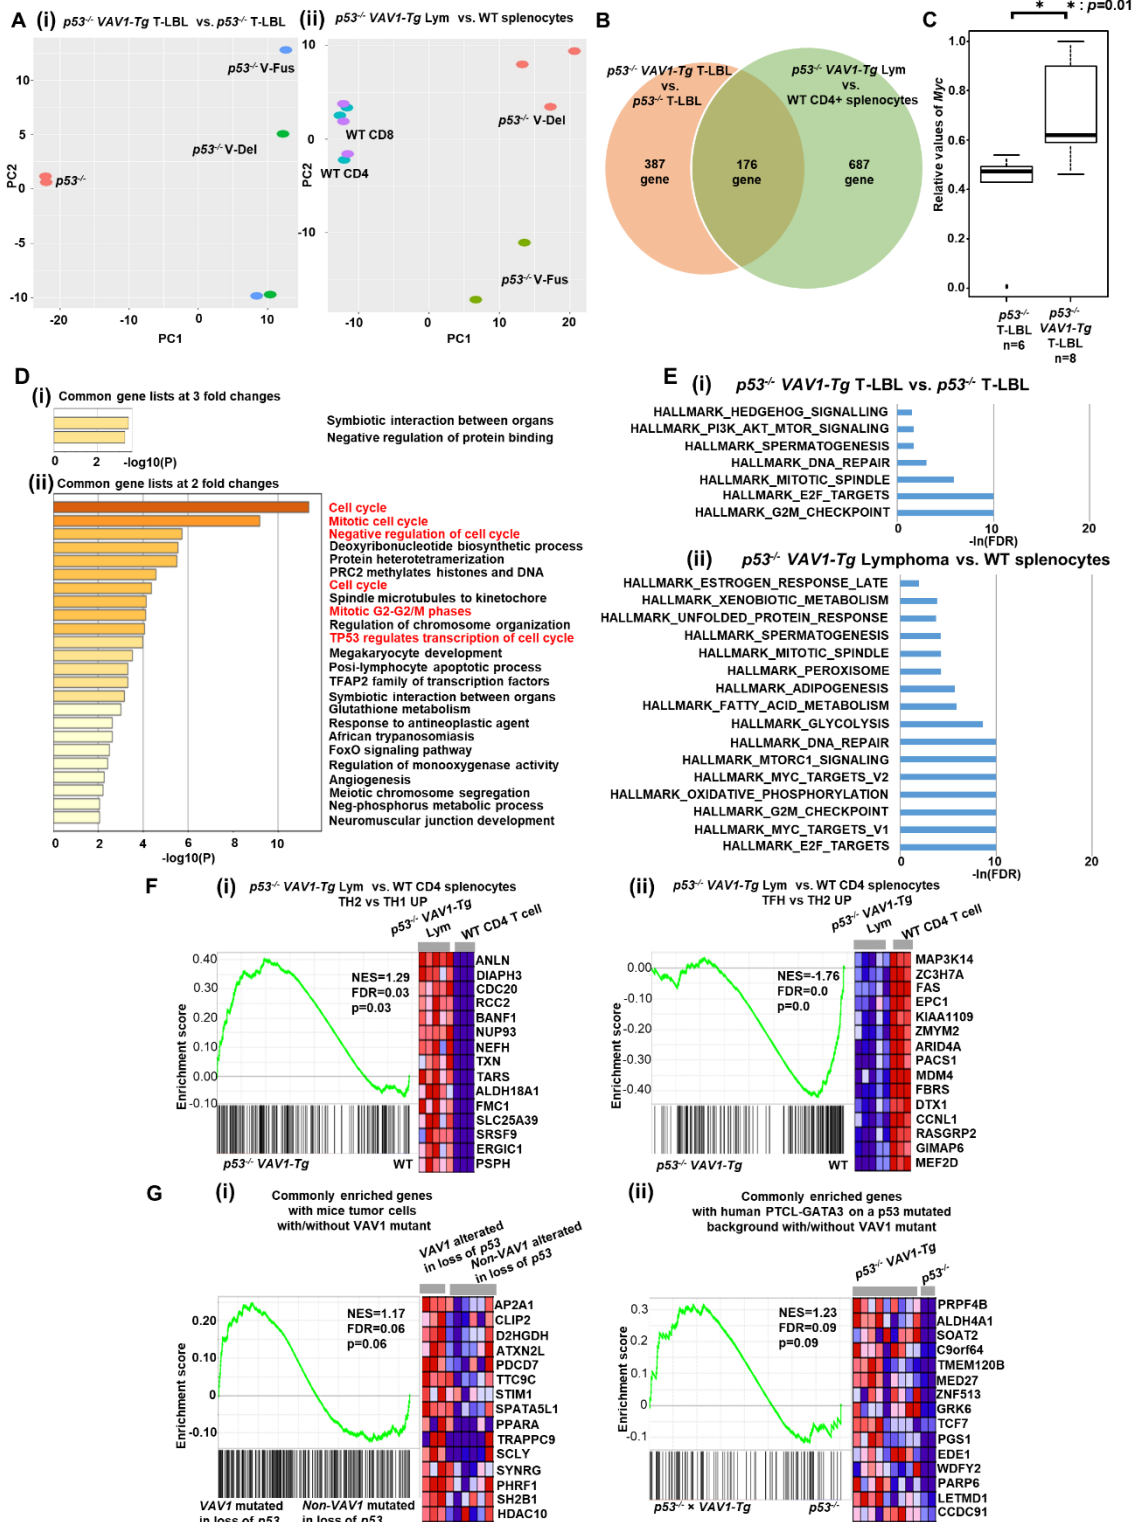

214

215 Supplementary Figure 5, related to Figure 5: Details of whole transcriptome analyses

216 **(WTAs) of tumors found in  $p53^{-/-}$  *VAV1-Tg* and  $p53^{-/-}$  mice.**

217 A. Principal component analysis (PCA) of T-LBL from  $p53^{-/-}$  V-Del,  $p53^{-/-}$  V-Fus and  $p53^{-/-}$  mice  
218 and whole thymocytes from WT mice (i), and tumor cells sorted from Lym from  $p53^{-/-}$  V-Del  
219 and  $p53^{-/-}$  V-Fus mice and CD4<sup>+</sup> or CD8<sup>+</sup> splenocytes from WT mice (ii).

220 B. Venn diagram showing genes more highly expressed by at least two-fold in T-LBL from  $p53^{-/-}$   
221 *VAV1-Tg* relative to  $p53^{-/-}$  mice, or those in Lym from  $p53^{-/-}$  *VAV1-Tg* mice relative to CD4<sup>+</sup>  
222 splenocytes.

223 C. Quantitative PCR analysis of *Myc* expression using T-LBL from  $p53^{-/-}$  mice and  $p53^{-/-}$  *VAV1-*  
224 *Tg* mice. The number of mice analyzed:  $p53^{-/-}$  mice, n=6;  $p53^{-/-}$  *VAV1-Tg* mice, n=8. \*  
225 indicates  $p=0.01$ .

226 D. Metascape analysis of gene ontology of genes (i) upregulated at least three-fold in T-LBL  
227 and Lym tumors from  $p53^{-/-}$  *VAV1-Tg* mice relative to controls, or (ii) upregulated at least  
228 two-fold in T-LBL and Lym tumors from  $p53^{-/-}$  *VAV1-Tg* relative to control mice.

229 E. Gene set enrichment analysis (GSEA) of tumor cells of T-LBL from  $p53^{-/-}$  *VAV1-Tg* mice  
230 compared with T-LBL from  $p53^{-/-}$  mice (i) and sorted from Lym from  $p53^{-/-}$  *VAV1-Tg* mice  
231 compared with CD4 splenocytes from WT mice (ii) performed using gene sets of Hallmark  
232 gene sets in the Molecular Signatures Database (MSigDB).

233 F. GSEA of tumor cells sorted from Lym from  $p53^{-/-}$  *VAV1-Tg* mice compared with CD4  
234 splenocytes from WT mice performed using gene sets of T-helper 2 (TH2) vs TH1 cells (i),  
235 and T follicular helper (TFH) vs TH2 cells (ii) in the MSigDB.

236 G. Comparison of WTAs from human PTCL-GATA3 with *VAV1* mutation and *Tp53* loss and  
237 WTAs from our mouse tumors harboring *VAV1* mutations. GSEA was performed for WTA  
238 data from tumors of  $p53^{-/-}$  *VAV1-Tg* vs.  $p53^{-/-}$  mice using the gene lists that were significantly  
239 enriched in PTCL-GATA3 samples with *VAV1* mutations (i) or from PTCL-GATA3 samples



240 with *VAV1* and *Tp53* alterations vs loss of *Tp53* without VAV1 mutations using the gene lists  
241 that were significantly enriched in tumors from *p53*<sup>-/-</sup> *VAV1*-Tg relative to *p53*<sup>-/-</sup> mice (ii).  
242

Supplementary Figure 6

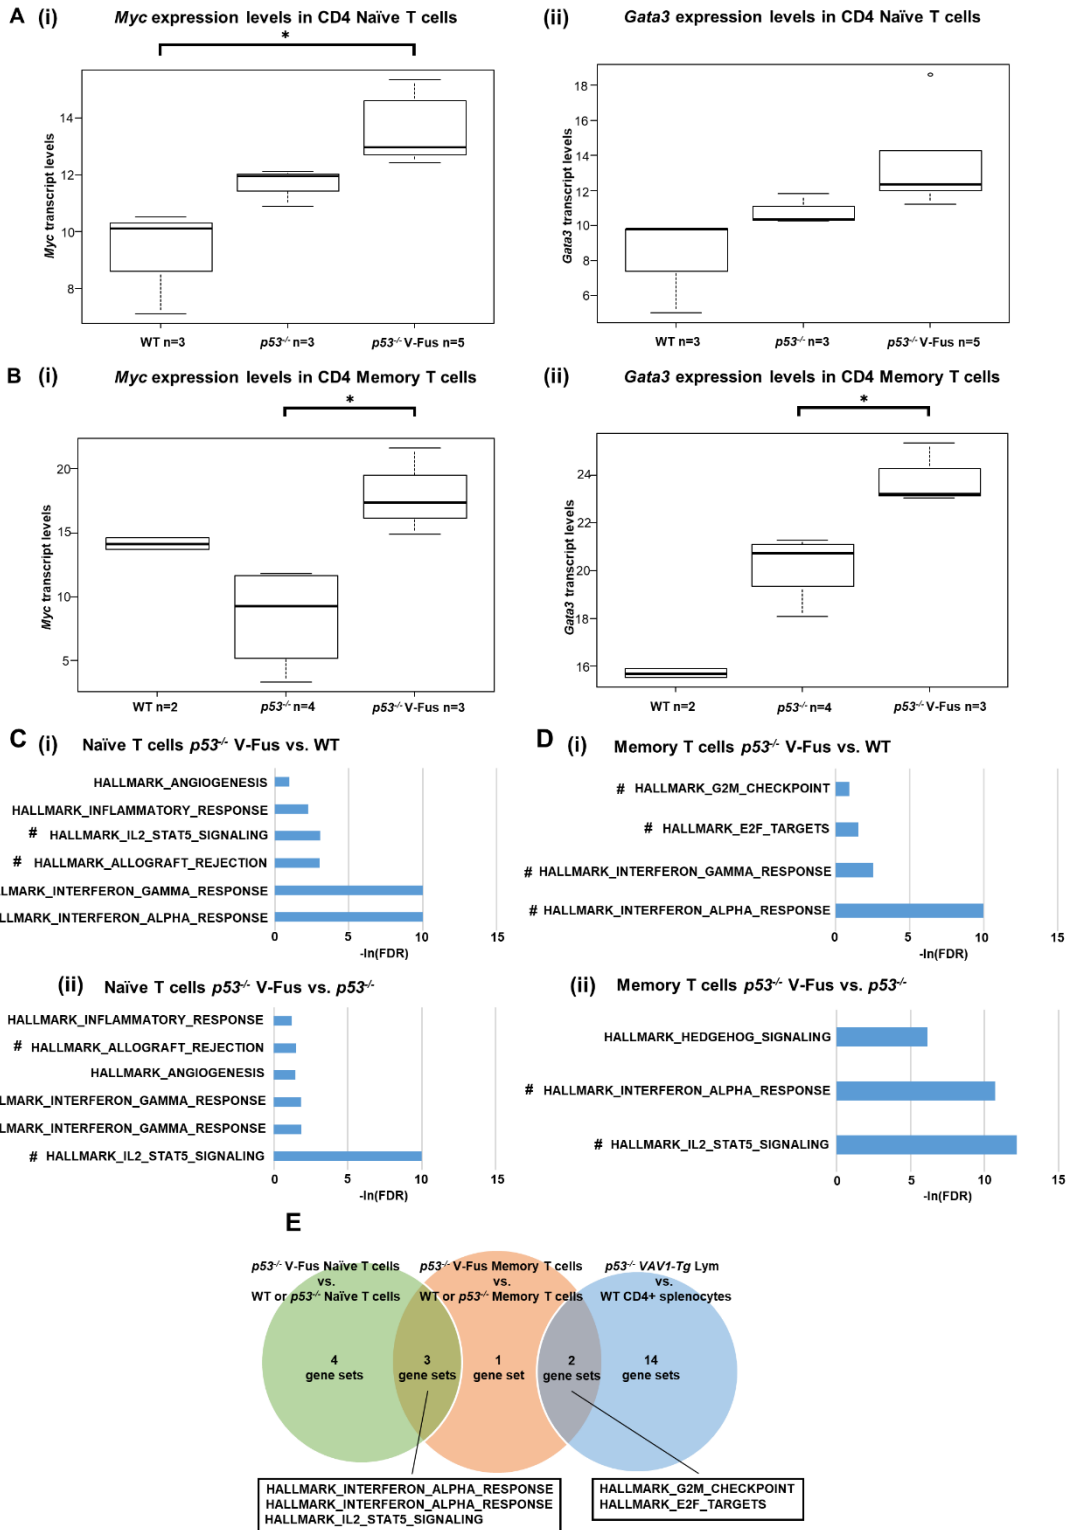

244 **Supplementary Figure 6, related to Figure 5: Details of WTAs CD4 naïve T cells and CD4**  
245 **memory T cells found in  $p53^{-/-}$  V-Fus and  $p53^{-/-}$  mice at 12 weeks of age.**

246 A-B. *Myc* (i) and *Gata3* (ii) expression levels in CD4 naïve T cells from WT mice (n=3),  $p53^{-/-}$   
247 mice of (n=3), and  $p53^{-/-}$  V-Fus mice (n=5) (A), and in CD4 memory T cells from WT mice (n=2),  
248  $p53^{-/-}$  mice of (n=4), and  $p53^{-/-}$  V-Fus mice (n=3) (B).

249 C-D. Gene set enrichment analysis (GSEA) of CD4 naïve T cells (C) and CD4 memory T cells  
250 (D) from  $p53^{-/-}$  V-Fus mice compared with those from WT mice (i), and CD4 naïve T cells (C)  
251 and CD4 memory T cells (D) from  $p53^{-/-}$  V-Fus mice compared with those from  $p53^{-/-}$  mice (ii)  
252 performed using gene sets of Hallmark gene sets in MSigDB.

253 E. Venn diagram showing common gene sets significantly enriched in CD4 naïve T cells from  
254  $p53^{-/-}$  V-Fus mice (green), CD4 memory T cells from  $p53^{-/-}$  V-Fus mice (red), and tumor cells  
255 sorted from Lym from  $p53^{-/-}$  *VAV1-Tg* mice (blue).

256

Supplementary Figure 7

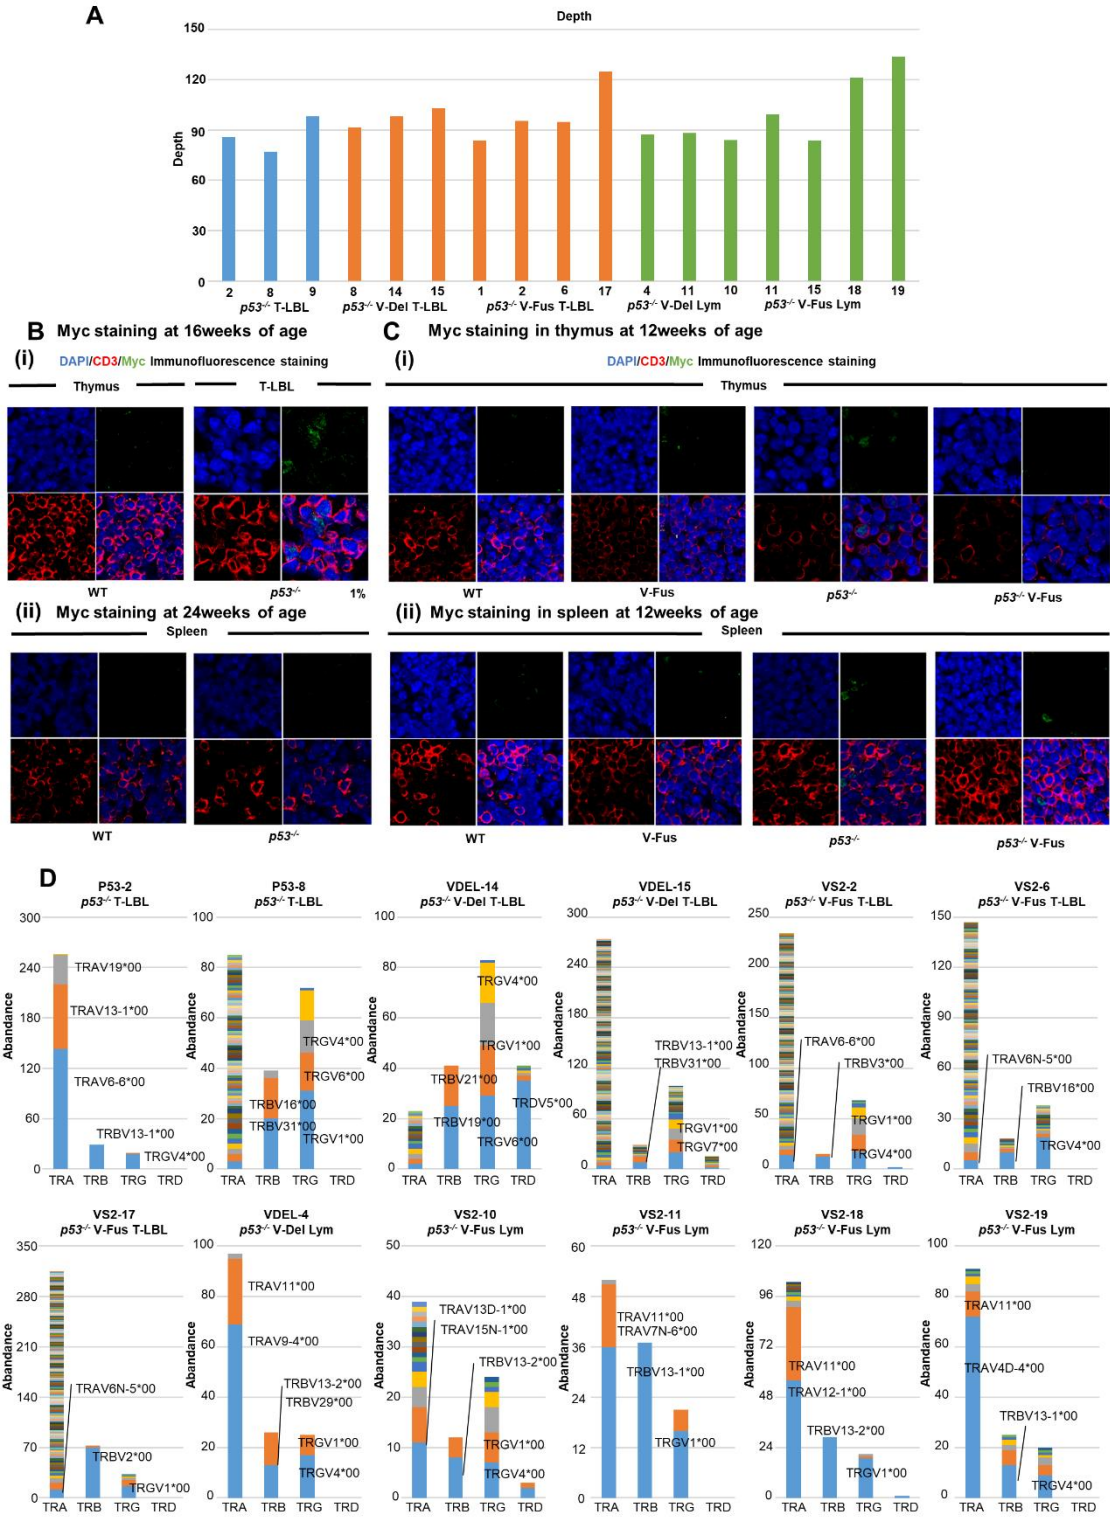

257

258 **Supplementary Figure 7, related to Figure 6: Details relevant to whole exome sequencing**

259 **analyses (WES) of tumors found in  $p53^{-/-}$  *VAV1-Tg* and  $p53^{-/-}$  mice.**

260 A. Comparison of average read depth among WES data for tumors from  $p53^{-/-}$  *VAV1-Tg* and  
261  $p53^{-/-}$  mice.

262 B. Immunofluorescent staining for indicated markers in thymus from WT and  $p53^{-/-}$  mice  
263 harboring T-LBL at 16 weeks of age (i), and in spleens from WT and  $p53^{-/-}$  mice without  
264 harboring T-LBL at 24 weeks of age (ii). The percentage at the bottom right corner on T-LBL  
265 from  $p53^{-/-}$  mice is positivity in the tumor cells. CD3, red; Myc, green; DAPI, blue.

266 C. Immunofluorescent staining for indicated markers in thymus (i) and in spleen (ii) from WT,  
267 V-Fus,  $p53^{-/-}$ , and  $p53^{-/-}$  V-Fus mice at 12 weeks of age. CD3, red; Myc, green; DAPI, blue.

268 D. Rearrangements of *T-cell receptor (TCR)* genes identified through the MiXCR algorithm  
269 using WES data. The y axis indicates each rearranged *TCR* gene with a certain CDR3  
270 sequence. Distinct CDR3 regions are indicated by alternating colors within each sample;  
271 colors matched across samples are coincidental and do not indicate sequence identity.

**Supplementary Table 1: Distribution and immunophenotype of each tumor found in mice of indicated genotype**

| <b>ID</b> | <b>Genotype</b>                 | <b>Onset</b> | <b>Infiltrated organ</b>               | <b>Diagnosis</b>             |
|-----------|---------------------------------|--------------|----------------------------------------|------------------------------|
| P53-1     | <i>p53</i> <sup>-/-</sup>       | 18           | Abdominal Tumor                        | Non-hematological malignancy |
| P53-2     | <i>p53</i> <sup>-/-</sup>       | 23.4         | Thymus, Lung                           | CD8 SP T-LBL                 |
| P53-3     | <i>p53</i> <sup>-/-</sup>       | 20.1         | Thymus                                 | CD4 CD8 DP T-LBL             |
| P53-4     | <i>p53</i> <sup>-/-</sup>       | 26.6         | Thymus                                 | CD4 CD8 DP T-LBL             |
| P53-5     | <i>p53</i> <sup>-/-</sup>       | 33.7         | Chest Tumor                            | Non-hematological malignancy |
| P53-6     | <i>p53</i> <sup>-/-</sup>       | 36           | Thymus                                 | CD4 CD8 DP T-LBL             |
| P53-7     | <i>p53</i> <sup>-/-</sup>       | 29.1         | Thymus                                 | CD4 CD8 DP T-LBL             |
| P53-8     | <i>p53</i> <sup>-/-</sup>       | 13.7         | Thymus, Lung                           | CD8 SP T-LBL                 |
| P53-9     | <i>p53</i> <sup>-/-</sup>       | 15.3         | Thymus, Lung                           | CD4 CD8 DP T-LBL             |
| P53-10    | <i>p53</i> <sup>-/-</sup>       | 28.4         | Abdominal Tumor                        | Non-hematological malignancy |
| P53-11    | <i>p53</i> <sup>-/-</sup>       | 20.9         | Thymus, Lung                           | CD8 SP T-LBL                 |
| P53-12    | <i>p53</i> <sup>-/-</sup>       | 27           | Thymus, Lung                           | CD4 CD8 DP T-LBL             |
| P53-13    | <i>p53</i> <sup>-/-</sup>       | 23.3         | Thymus, Lung                           | CD4 CD8 DP T-LBL             |
| P53-14    | <i>p53</i> <sup>-/-</sup>       | 35.6         | Abdominal Tumor                        | Non-hematological malignancy |
| P53-15    | <i>p53</i> <sup>-/-</sup>       | 30.9         | Thymus, Lung                           | CD4 CD8 DP T-LBL             |
| P53-16    | <i>p53</i> <sup>-/-</sup>       | 20.6         | Thymus, Lung                           | CD4 CD8 DP T-LBL             |
| VDEL-1    | <i>p53</i> <sup>-/-</sup> V-Del | 28           | Chest Tumor                            | Non-hematological malignancy |
| VDEL-2    | <i>p53</i> <sup>-/-</sup> V-Del | 14.4         | Thymus, Lung                           | CD8 SP T-LBL                 |
| VDEL-3    | <i>p53</i> <sup>-/-</sup> V-Del | 13.6         | Thymus, Lung                           | CD8 SP T-LBL                 |
| VDEL-4    | <i>p53</i> <sup>-/-</sup> V-Del | 24.9         | Liver, Thymus, Lung, Lymph, BM, Spleen | DN Lym                       |
| VDEL-5    | <i>p53</i> <sup>-/-</sup> V-Del | 20.7         | Thymus, Lung                           | CD4 CD8 DP T-LBL             |
| VDEL-6    | <i>p53</i> <sup>-/-</sup> V-Del | 18.3         | Thymus, Lung, Liver, Spleen            | CD8 SP T-LBL                 |

|         |                                 |      |                                |                              |
|---------|---------------------------------|------|--------------------------------|------------------------------|
| VDEL-7  | <i>p53</i> <sup>-/-</sup> V-Del | 19.1 | Thymus, Lung                   | CD8 SP T-LBL                 |
| VDEL-8  | <i>p53</i> <sup>-/-</sup> V-Del | 15.4 | Thymus, Lung, Liver            | CD4 CD8 DP T-LBL             |
| VDEL-9  | <i>p53</i> <sup>-/-</sup> V-Del | 27   | Abdominal Tumor                | Non-hematological malignancy |
| VDEL-10 | <i>p53</i> <sup>-/-</sup> V-Del | 14.6 | Thymus, Lung                   | CD8 SP T-LBL                 |
| VDEL-11 | <i>p53</i> <sup>-/-</sup> V-Del | 29.3 | Spleen, Liver, Lung, BM        | DN Lym                       |
| VDEL-12 | <i>p53</i> <sup>-/-</sup> V-Del | 27.1 | Spleen, Liver, Lung, BM, Lymph | CD4 SP Lym                   |
| VDEL-13 | <i>p53</i> <sup>-/-</sup> V-Del | 13   | Thymus                         | CD8 SP T-LBL                 |
| VDEL-14 | <i>p53</i> <sup>-/-</sup> V-Del | 16.4 | Thymus, Lung                   | CD4 CD8 DP T-LBL             |
| VDEL-15 | <i>p53</i> <sup>-/-</sup> V-Del | 16.1 | Thymus, Lung, Liver            | CD8 SP T-LBL                 |
| VDEL-16 | <i>p53</i> <sup>-/-</sup> V-Del | 19   | Thymus                         | CD8 SP T-LBL                 |
| VDEL-17 | <i>p53</i> <sup>-/-</sup> V-Del | 14.7 | Thymus, Lung, Liver            | CD8 SP T-LBL                 |
| VDEL-18 | <i>p53</i> <sup>-/-</sup> V-Del | 14.6 | Thymus, Lung, Liver            | CD8 SP T-LBL                 |
| VDEL-19 | <i>p53</i> <sup>-/-</sup> V-Del | 18.7 | Thymus, Lung, Liver            | CD8 SP T-LBL                 |
| VDEL-20 | <i>p53</i> <sup>-/-</sup> V-Del | 13.3 | Thymus, Lung                   | CD4 CD8 DP T-LBL             |
| VDEL-21 | <i>p53</i> <sup>-/-</sup> V-Del | 20.6 | Spleen, Liver, Lung, BM, Lymph | CD4 SP Lym                   |
| VS2-1   | <i>p53</i> <sup>-/-</sup> V-Fus | 16.1 | Thymus, Lung                   | CD8 SP T-LBL                 |
| VS2-2   | <i>p53</i> <sup>-/-</sup> V-Fus | 14.7 | Thymus, Lung                   | CD8 SP T-LBL                 |
| VS2-3   | <i>p53</i> <sup>-/-</sup> V-Fus | 18.6 | Thymus, Lung, Chest Tumor      | CD8 SP T-LBL                 |
| VS2-4   | <i>p53</i> <sup>-/-</sup> V-Fus | 17.6 | Chest Tumor                    | Non-hematological malignancy |
| VS2-5   | <i>p53</i> <sup>-/-</sup> V-Fus | 14   | Thymus                         | CD8 SP T-LBL                 |
| VS2-6   | <i>p53</i> <sup>-/-</sup> V-Fus | 16.9 | Thymus, Lung, Liver            | CD8 SP T-LBL                 |
| VS2-7   | <i>p53</i> <sup>-/-</sup> V-Fus | 21.9 | Thymus, Lung                   | CD8 SP T-LBL                 |
| VS2-8   | <i>p53</i> <sup>-/-</sup> V-Fus | 11.6 | Thymus                         | CD8 SP T-LBL                 |
| VS2-9   | <i>p53</i> <sup>-/-</sup> V-Fus | 22.9 | Thymus                         | CD8 SP T-LBL                 |
| VS2-10  | <i>p53</i> <sup>-/-</sup> V-Fus | 27.6 | Spleen, Liver                  | CD4 SP Lym                   |

|        |                                 |      |                                |                  |
|--------|---------------------------------|------|--------------------------------|------------------|
| VS2-11 | <i>p53</i> <sup>-/-</sup> V-Fus | 32.6 | Spleen, Liver, Lymph           | DN Lym           |
| VS2-12 | <i>p53</i> <sup>-/-</sup> V-Fus | 14.9 | Thymus, Lung, Liver            | CD8 SP T-LBL     |
| VS2-13 | <i>p53</i> <sup>-/-</sup> V-Fus | 14.1 | Thymus, Lung                   | CD8 SP T-LBL     |
| VS2-14 | <i>p53</i> <sup>-/-</sup> V-Fus | 20.1 | Thymus                         | CD8 SP T-LBL     |
| VS2-15 | <i>p53</i> <sup>-/-</sup> V-Fus | 21.6 | Spleen, Lymph                  | DN Lym           |
| VS2-16 | <i>p53</i> <sup>-/-</sup> V-Fus | 25.7 | Spleen, Lymph, Liver           | DN Lym           |
| VS2-17 | <i>p53</i> <sup>-/-</sup> V-Fus | 17.1 | Thymus, Lung, Liver            | CD4 CD8 DP T-LBL |
| VS2-18 | <i>p53</i> <sup>-/-</sup> V-Fus | 27.6 | Spleen, Lymph, Liver           | DN Lym           |
| VS2-19 | <i>p53</i> <sup>-/-</sup> V-Fus | 27.6 | Spleen, Lymph, Liver           | DN Lym           |
| VS2-20 | <i>p53</i> <sup>-/-</sup> V-Fus | 21.1 | Thymus, Lung                   | CD8 SP T-LBL     |
| VS2-21 | <i>p53</i> <sup>-/-</sup> V-Fus | 26   | Spleen, Liver, Lung, BM        | CD4 SP Lym       |
| VS2-22 | <i>p53</i> <sup>-/-</sup> V-Fus | 15   | Thymus, Lung                   | CD8 SP T-LBL     |
| VS2-23 | <i>p53</i> <sup>-/-</sup> V-Fus | 32   | Spleen, Liver, Lung, BM, Lymph | DN Lym           |



**Supplementary Table 2: Genes commonly upregulated in T-LBL from *p53*<sup>-/-</sup> *VAV1-Tg* mice compared with T-LBL from *p53*<sup>-/-</sup> mice and Lym tumors from *p53*<sup>-/-</sup> *VAV1-Tg* compared with CD4 splenocytes from WT mice.**

| <b>Common genes showing at least a 3-fold change</b> |         |          |           |          |         |          |
|------------------------------------------------------|---------|----------|-----------|----------|---------|----------|
| 1700080G11Rik                                        | Cdkn2c  | Hemgn    | Mapk13    | Ngp      | Sord    | Tcrg-V6  |
| 5830411N06Rik                                        | Chdh    | Ighg2c   | Mt2       | Padi3    | Spats2  | Tedc1    |
| Als2                                                 | Cmtm7   | Igkv4-61 | Mxd3      | Ptprf    | Stmn1   | Trav9d-4 |
| Bex4                                                 | Fbln1   | I117rb   | Myc       | Sh2d1a   | Tcrg-C1 | Trbv2    |
| Camp                                                 | Gm4316  | Itm2a    | Myl10     | Smtn     | Tcrg-V4 | Tyms     |
| Ccr4                                                 |         |          |           |          |         |          |
| <b>Common genes showing at least 2-fold change</b>   |         |          |           |          |         |          |
| 0610010F05Rik                                        | Cby1    | Depdc1a  | Gmn       | Lsr      | Prc1    | Stom     |
| 1700080G11Rik                                        | Ccnb1   | Dhfr     | Gsta4     | Mapk13   | Prkar2b | Tbc1d31  |
| 1700097N02Rik                                        | Ccne2   | Dleu7    | Gstm1     | Marcksl1 | Ptgr1   | Tcrg-C1  |
| 2010300C02Rik                                        | Ccr4    | Drosha   | Gtse1     | Mki67    | Ptov1   | Tcrg-V4  |
| 4930471C06Rik                                        | Cdk2ap1 | Dut      | Hba-a1    | Mns1     | Ptprf   | Tcrg-V6  |
| 5830411N06Rik                                        | Cdkn2b  | E2f3     | Hbb-bt    | Mt2      | Pxmp2   | Tedc1    |
| 9630013D21Rik                                        | Cdkn2c  | E2f8     | Hemgn     | Mtf2     | Rab44   | Tfrc     |
| AA467197                                             | Cenpf   | Egfl7    | Hist1h2ai | Mxd3     | Rcbtb2  | Tmem59l  |
| Aco2                                                 | Cenpk   | Egln3    | Hist1h2ap | Mybl2    | Rrm1    | Top2a    |
| Acot7                                                | Cenpm   | Eng      | Hist1h3h  | Myc      | Rrm2    | Tpx2     |
| Adgrg1                                               | Cenpv   | Enkd1    | Hist1h3i  | Myl10    | Rwdd2a  | Trav7n-6 |

|          |        |         |          |         |         |          |
|----------|--------|---------|----------|---------|---------|----------|
| Adss11   | Chdh   | Etv5    | Ighg2c   | My16b   | Sgsm3   | Trav9-4  |
| Aif11    | Cited4 | Ezh2    | Igkv4-61 | Nabp1   | Sh2d1a  | Trav9d-4 |
| Als2     | Ckap21 | Fads2   | Igsf23   | Ngp     | Ska1    | Trbv12-2 |
| Anxa2    | Clspn  | Fam216a | Il10     | Nsd2    | Ska2    | Trbv2    |
| Apol10b  | Cmc2   | Fam69b  | Il17rb   | Nsl1    | Slc43a3 | Troap    |
| Arhgef39 | Cmtm7  | Fbln1   | Il9r     | Nuf2    | Slc9a9  | Tuba1b   |
| Atad2    | Colq   | Fkbp5   | Islr     | Padi3   | Slfn4   | Tyms     |
| Atp1b2   | Coro2a | Foxm1   | Itm2a    | Padi4   | Slfn9   | Xrcc6    |
| Aurka    | Cox6b2 | Gfi1    | Jdp2     | Parm1   | Smtn    | Zfp428   |
| Bex4     | Cpa3   | Gm10451 | Jup      | Parvg   | Soat2   |          |
| Bub1b    | Crip2  | Gm15915 | Kif20a   | Pdcd1   | Sord    |          |
| C1qtnf12 | Crip2  | Gm28942 | Kn11     | Phf5a   | Spats2  |          |
| Camp     | Cym    | Gm34093 | Knstrn   | Pik3r3  | Spc25   |          |
| Cbx5     | Ddah2  | Gm4316  | Lockd    | Pimreg  | Stil    |          |
| Cbx6     | Ddit4  | Gm47459 | Lrr1     | Ppp1r1b | Stmn1   |          |

**Supplementary Table 3: Metascape analysis based on list of commonly upregulated genes.**

| <b>Common gene list at 3 fold changes</b> |                               |                                                                                                    |              |                   |                |                     |
|-------------------------------------------|-------------------------------|----------------------------------------------------------------------------------------------------|--------------|-------------------|----------------|---------------------|
| <b>Terms</b>                              | <b>Category</b>               | <b>Description</b>                                                                                 | <b>LogP</b>  | <b>Enrichment</b> | <b>Z-score</b> | <b>Log(q-value)</b> |
| GO:0051817                                | GO<br>Biological<br>Processes | modification of morphology or<br>physiology of other organism involved in<br>symbiotic interaction | -3.420156077 | 21.14672216       | 7.611326004    | 0                   |
| GO:0032091                                | GO<br>Biological<br>Processes | negative regulation of protein binding                                                             | -3.2537605   | 18.55325624       | 7.082142651    | 0                   |
| <b>Common gene list at 2 fold changes</b> |                               |                                                                                                    |              |                   |                |                     |
| <b>Terms</b>                              | <b>Category</b>               | <b>Description</b>                                                                                 | <b>LogP</b>  | <b>Enrichment</b> | <b>Z-score</b> | <b>Log(q-value)</b> |
| R-MMU-<br>1640170                         | Reactome<br>Gene Sets         | Cell Cycle                                                                                         | -11.35710387 | 5.747849247       | 9.873244324    | -7.095365318        |
| GO:1903047                                | GO<br>Biological<br>Processes | mitotic cell cycle process                                                                         | -9.175240508 | 4.705587436       | 8.35716471     | -5.515561952        |
| GO:0045786                                | GO<br>Biological<br>Processes | negative regulation of cell cycle                                                                  | -5.716463305 | 4.369570827       | 6.337780115    | -2.727255839        |
| GO:0009263                                | GO<br>Biological<br>Processes | deoxyribonucleotide biosynthetic process                                                           | -5.523972573 | 37.70315399       | 12.00425765    | -2.584453321        |
| GO:0051290                                | GO<br>Biological<br>Processes | protein heterotetramerization                                                                      | -5.483387593 | 14.66233766       | 8.784517832    | -2.564071727        |
| R-MMU-<br>212300                          | Reactome<br>Gene Sets         | PRC2 methylates histones and DNA                                                                   | -4.550706193 | 10.15084915       | 7.075579504    | -1.751365644        |
| mmu04110                                  | KEGG<br>Pathway               | Cell cycle                                                                                         | -4.347659986 | 7.44941349        | 6.2947482      | -1.563042693        |

|               |                         |                                                                                              |              |             |             |              |
|---------------|-------------------------|----------------------------------------------------------------------------------------------|--------------|-------------|-------------|--------------|
| GO:0008608    | GO Biological Processes | attachment of spindle microtubules to kinetochore                                            | -4.127586661 | 17.59480519 | 7.948255901 | -1.44563171  |
| R-MMU-453274  | Reactome Gene Sets      | Mitotic G2-G2/M phases                                                                       | -4.092958681 | 6.792112299 | 5.922195981 | -1.422284741 |
| GO:0033044    | GO Biological Processes | regulation of chromosome organization                                                        | -4.054589859 | 4.077447833 | 5.118841089 | -1.394911303 |
| R-MMU-6791312 | Reactome Gene Sets      | TP53 Regulates Transcription of Cell Cycle Genes                                             | -3.961154433 | 15.99527745 | 7.533254446 | -1.332884342 |
| R-MMU-983231  | Reactome Gene Sets      | Factors involved in megakaryocyte development and platelet production                        | -3.49160128  | 6.543522593 | 5.344333541 | -0.970225422 |
| GO:0070230    | GO Biological Processes | positive regulation of lymphocyte apoptotic process                                          | -3.289494653 | 18.85157699 | 7.152024626 | -0.833936079 |
| R-MMU-8864260 | Reactome Gene Sets      | Transcriptional regulation by the AP-2 (TFAP2) family of transcription factors               | -3.289494653 | 18.85157699 | 7.152024626 | -0.833936079 |
| GO:0051817    | GO Biological Processes | modification of morphology or physiology of other organism involved in symbiotic interaction | -3.14757454  | 7.094679514 | 5.147621694 | -0.718344905 |
| mmu00480      | KEGG Pathway            | Glutathione metabolism                                                                       | -2.981249083 | 8.946511116 | 5.341363211 | -0.594571799 |
| GO:0097327    | GO Biological Processes | response to antineoplastic agent                                                             | -2.616512386 | 7.133029133 | 4.618503781 | -0.407852282 |
| mmu05143      | KEGG Pathway            | African trypanosomiasis                                                                      | -2.595747159 | 10.99675325 | 5.245821325 | -0.390913463 |
| mmu04068      | KEGG Pathway            | FoxO signaling pathway                                                                       | -2.475116557 | 4.998524203 | 4.027355966 | -0.30224575  |
| GO:0032768    | GO Biological Processes | regulation of monooxygenase activity                                                         | -2.403889454 | 9.425788497 | 4.776422167 | -0.255925474 |

|            |                               |                                                        |              |             |             |              |
|------------|-------------------------------|--------------------------------------------------------|--------------|-------------|-------------|--------------|
| GO:0001525 | GO<br>Biological<br>Processes | angiogenesis                                           | -2.235179278 | 2.572339941 | 3.151921082 | -0.152417678 |
| GO:0045132 | GO<br>Biological<br>Processes | meiotic chromosome segregation                         | -2.195867705 | 5.441692328 | 3.831700504 | -0.127253756 |
| GO:0010563 | GO<br>Biological<br>Processes | negative regulation of phosphorus<br>metabolic process | -2.053407337 | 2.416868845 | 2.932636447 | -0.037181457 |
| GO:0007528 | GO<br>Biological<br>Processes | neuromuscular junction development                     | -2.033385317 | 6.94531784  | 3.927721473 | -0.029325345 |

**Supplementary Table 4: Pathways enriched in *p53*<sup>-/-</sup> *VAV1-Tg* T-LBL relative to *p53*<sup>-/-</sup> T-LBL or Lym relative to WT mice, as analyzed by GSEA with the Hallmark matrix.**

| <i>p53</i> <sup>-/-</sup> <i>VAV1-Tg</i> T-LBL vs <i>p53</i> <sup>-/-</sup> T-LBL | NES       | NOM p-val   | FDR q-val   | FWER p-val |
|-----------------------------------------------------------------------------------|-----------|-------------|-------------|------------|
| HALLMARK_G2M_CHECKPOINT                                                           | 2.3501885 | 0           | 0           | 0          |
| HALLMARK_E2F_TARGETS                                                              | 1.9904214 | 0           | 0           | 0          |
| HALLMARK_MITOTIC_SPINDLE                                                          | 1.7532481 | 0           | 0.00276138  | 0.008      |
| HALLMARK_DNA_REPAIR                                                               | 1.4463986 | 0.00990099  | 0.047589343 | 0.176      |
| HALLMARK_SPERMATOGENESIS                                                          | 1.2666688 | 0.053892214 | 0.18260913  | 0.591      |
| HALLMARK_PI3K_AKT_MTOR_SIGNALING                                                  | 1.2462898 | 0.063400574 | 0.1768789   | 0.643      |
| HALLMARK_HEDGEHOG_SIGNALING                                                       | 1.1981287 | 0.1883289   | 0.22175923  | 0.781      |
| <i>p53</i> <sup>-/-</sup> <i>VAV1-Tg</i> Lym vs WT T splenocytes                  | NES       | NOM p-val   | FDR q-val   | FWER p-val |
| HALLMARK_E2F_TARGETS                                                              | 2.558755  | 0           | 0           | 0          |
| HALLMARK_MYC_TARGETS_V1                                                           | 2.3682046 | 0           | 0           | 0          |
| HALLMARK_G2M_CHECKPOINT                                                           | 2.3399968 | 0           | 0           | 0          |
| HALLMARK_OXIDATIVE_PHOSPHORYLATION                                                | 2.211721  | 0           | 0           | 0          |
| HALLMARK_MYC_TARGETS_V2                                                           | 2.132254  | 0           | 0           | 0          |
| HALLMARK_MTORC1_SIGNALING                                                         | 1.998908  | 0           | 0           | 0          |
| HALLMARK_DNA_REPAIR                                                               | 1.804022  | 0           | 8.93E-05    | 0.001      |
| HALLMARK_GLYCOLYSIS                                                               | 1.7896651 | 0           | 7.81E-05    | 0.001      |
| HALLMARK_FATTY_ACID_METABOLISM                                                    | 1.6952677 | 0           | 5.76E-04    | 0.008      |
| HALLMARK_ADIPOGENESIS                                                             | 1.6419766 | 0           | 0.001280819 | 0.02       |
| HALLMARK_UNFOLDED_PROTEIN_RESPONSE                                                | 1.512732  | 0.003218884 | 0.007342448 | 0.118      |

|                                                                                                                                   |            |                  |                  |                   |
|-----------------------------------------------------------------------------------------------------------------------------------|------------|------------------|------------------|-------------------|
| HALLMARK_MITOTIC_SPINDLE                                                                                                          | 1.5051714  | 0.001021451      | 0.007314903      | 0.129             |
| HALLMARK_SPERMATOGENESIS                                                                                                          | 1.4469849  | 0.010660981      | 0.014756831      | 0.262             |
| HALLMARK_PEROXISOME                                                                                                               | 1.4406089  | 0.006465518      | 0.015148852      | 0.286             |
| HALLMARK_XENOBIOTIC_METABOLISM                                                                                                    | 1.3807272  | 0.003064351      | 0.032415345      | 0.533             |
| HALLMARK_REACTIVE_OXYGEN_SPECIES_PATHWAY                                                                                          | 1.322251   | 0.06317044       | 0.06153159       | 0.795             |
| HALLMARK_ESTROGEN_RESPONSE_LATE                                                                                                   | 1.2429414  | 0.055158325      | 0.13925622       | 0.986             |
| <b><i>p53</i><sup>-/-</sup> V-Fus CD4 naïve T cells vs WT CD4 naïve T cells at non-tumor bearing status</b>                       | <b>NES</b> | <b>NOM p-val</b> | <b>FDR q-val</b> | <b>FWER p-val</b> |
| HALLMARK_INTERFERON_ALPHA_RESPONSE                                                                                                | 2.7964284  | 0                | 0                | 0                 |
| HALLMARK_INTERFERON_GAMMA_RESPONSE                                                                                                | 2.6829524  | 0                | 0                | 0                 |
| HALLMARK_ALLOGRAFT_REJECTION                                                                                                      | 1.9574037  | 0                | 2.44E-04         | 0.001             |
| HALLMARK_IL2_STAT5_SIGNALING                                                                                                      | 1.8979421  | 0                | 0.00118635       | 0.006             |
| HALLMARK_INFLAMMATORY_RESPONSE                                                                                                    | 1.677466   | 0                | 0.006421625      | 0.042             |
| HALLMARK_ANGIOGENESIS                                                                                                             | 1.3543328  | 0.08969466       | 0.11393599       | 0.607             |
| <b><i>p53</i><sup>-/-</sup> V-Fus CD4 naïve T cells vs <i>p53</i><sup>-/-</sup> CD4 naïve T cells at non-tumor bearing status</b> | <b>NES</b> | <b>NOM p-val</b> | <b>FDR q-val</b> | <b>FWER p-val</b> |
| HALLMARK_IL2_STAT5_SIGNALING                                                                                                      | 1.9698863  | 0                | 0                | 0                 |
| HALLMARK_INTERFERON_ALPHA_RESPONSE                                                                                                | 1.6037624  | 0                | 0.013664926      | 0.042             |
| HALLMARK_INTERFERON_GAMMA_RESPONSE                                                                                                | 1.5591754  | 0                | 0.014285092      | 0.065             |
| HALLMARK_ANGIOGENESIS                                                                                                             | 1.4229727  | 0.042857144      | 0.03809379       | 0.218             |
| HALLMARK_ALLOGRAFT_REJECTION                                                                                                      | 1.4157016  | 0.002923977      | 0.03276637       | 0.236             |
| HALLMARK_INFLAMMATORY_RESPONSE                                                                                                    | 1.3260729  | 0.029315962      | 0.062172648      | 0.467             |
| <b><i>p53</i><sup>-/-</sup> V-Fus CD4 memory T cells vs WT CD4 memory T cells at non-tumor bearing status</b>                     | <b>NES</b> | <b>NOM p-val</b> | <b>FDR q-val</b> | <b>FWER p-val</b> |

|                                                                                                                                     |            |                  |                  |                   |
|-------------------------------------------------------------------------------------------------------------------------------------|------------|------------------|------------------|-------------------|
| HALLMARK_INTERFERON_ALPHA_RESPONSE                                                                                                  | 2.2760396  | 0                | 0                | 0                 |
| HALLMARK_INTERFERON_GAMMA_RESPONSE                                                                                                  | 1.7543682  | 0                | 0.004138116      | 0.013             |
| HALLMARK_E2F_TARGETS                                                                                                                | 1.513492   | 0.005249344      | 0.035874285      | 0.161             |
| HALLMARK_G2M_CHECKPOINT                                                                                                             | 1.3215445  | 0.015625         | 0.12918386       | 0.582             |
| <b><i>p53<sup>-/-</sup></i> V-Fus CD4 memory T cells vs <i>p53<sup>-/-</sup></i> CD4 memory T cells at non-tumor bearing status</b> | <b>NES</b> | <b>NOM p-val</b> | <b>FDR q-val</b> | <b>FWER p-val</b> |
| HALLMARK_IL2_STAT5_SIGNALING                                                                                                        | 1.623906   | 0                | 0.06021363       | 0.066             |
| HALLMARK_INTERFERON_ALPHA_RESPONSE                                                                                                  | 1.5426632  | 0                | 0.08491196       | 0.177             |
| HALLMARK_HEDGEHOG_SIGNALING                                                                                                         | 1.4112917  | 0.05970149       | 0.24272242       | 0.566             |



**Supplementary Table 5: Pathways enriched in *p53*<sup>-/-</sup> *VAV1-Tg* T-LBL relative to *p53*<sup>-/-</sup> T-LBL or Lym relative to WT mice, as analyzed by GSEA with curated gene sets.**

| <i>p53</i> <sup>-/-</sup> <i>VAV1-Tg</i> T-LBL vs <i>p53</i> <sup>-/-</sup> T-LBL | NES       | NOM p-val | FDR q-val | FWER p-val |
|-----------------------------------------------------------------------------------|-----------|-----------|-----------|------------|
| MORI_IMMATURE_B_LYMPHOCYTE_DN                                                     | 2.4418066 | 0         | 0         | 0          |
| MORI_LARGE_PRE_BII_LYMPHOCYTE_UP                                                  | 2.4258852 | 0         | 0         | 0          |
| CROONQUIST_IL6_DEPRIVATION_DN                                                     | 2.3914618 | 0         | 0         | 0          |
| ZHOU_CELL_CYCLE_GENES_IN_IR_RESPONSE_24HR                                         | 2.3874774 | 0         | 0         | 0          |
| ISHIDA_E2F_TARGETS                                                                | 2.337184  | 0         | 0         | 0          |
| BURTON_ADIPOGENESIS_3                                                             | 2.3053317 | 0         | 0         | 0          |
| ROSTY_CERVICAL_CANCER_PROLIFERATION_CLUSTER                                       | 2.2952988 | 0         | 0         | 0          |
| KONG_E2F3_TARGETS                                                                 | 2.29428   | 0         | 0         | 0          |
| CROONQUIST_NRAS_SIGNALING_DN                                                      | 2.2648106 | 0         | 0         | 0          |
| ODONNELL_TFRC_TARGETS_DN                                                          | 2.25795   | 0         | 0         | 0          |
| LI_INDUCED_T_TO_NATURAL_KILLER_DN                                                 | 2.252859  | 0         | 0         | 0          |
| HOFFMANN_LARGE_TO_SMALL_PRE_BII_LYMPHOCYTE_UP                                     | 2.2306979 | 0         | 0         | 0          |
| ZHOU_CELL_CYCLE_GENES_IN_IR_RESPONSE_6HR                                          | 2.222351  | 0         | 0         | 0          |
| FISCHER_G2_M_CELL_CYCLE                                                           | 2.2221959 | 0         | 0         | 0          |
| ZHAN_MULTIPLE_MYELOMA_PR_UP                                                       | 2.2020533 | 0         | 0         | 0          |
| WHITFIELD_CELL_CYCLE_G2                                                           | 2.2007034 | 0         | 0         | 0          |
| REACTOME_MITOTIC_PROMETAPHASE                                                     | 2.1997523 | 0         | 0         | 0          |

|                                                  |           |             |          |       |
|--------------------------------------------------|-----------|-------------|----------|-------|
| PUJANA_BRCA2_PCC_NETWORK                         | 2.1975908 | 0           | 0        | 0     |
| MORI_MATURE_B_LYMPHOCYTE_DN                      | 2.1769059 | 0           | 1.18E-04 | 0.002 |
| KOBAYASHI_EGFR_SIGNALING_24HR_DN                 | 2.1751773 | 0           | 1.12E-04 | 0.002 |
| FLORIO_NEOCORTEX_BASAL_RADIAL_GLIA_DN            | 2.1657133 | 0           | 1.06E-04 | 0.002 |
| ODONNELL_TARGETS_OF_MYC_AND_TFRC_DN              | 2.1607919 | 0           | 1.53E-04 | 0.003 |
| KANG_DOXORUBICIN_RESISTANCE_UP                   | 2.141991  | 0           | 1.46E-04 | 0.003 |
| SOTIRIOU_BREAST_CANCER_GRADE_1_VS_3_UP           | 2.1369905 | 0           | 1.87E-04 | 0.004 |
| PYEON_HPV_POSITIVE_TUMORS_UP                     | 2.128333  | 0           | 1.80E-04 | 0.004 |
| WHITEFORD_PEDIATRIC_CANCER_MARKERS               | 2.1164424 | 0           | 1.73E-04 | 0.004 |
| WHITFIELD_CELL_CYCLE_LITERATURE                  | 2.110056  | 0           | 2.09E-04 | 0.005 |
| REACTOME_CELL_CYCLE_MITOTIC                      | 2.094323  | 0           | 2.82E-04 | 0.007 |
| PUJANA_XPRSS_INT_NETWORK                         | 2.0942852 | 0           | 2.72E-04 | 0.007 |
| FURUKAWA_DUSP6_TARGETS_PCI35_DN                  | 2.0842986 | 0           | 3.37E-04 | 0.009 |
| LEE_EARLY_T_LYMPHOCYTE_UP                        | 2.0842857 | 0           | 3.26E-04 | 0.009 |
| DUTERTRE ESTRADIOL_RESPONSE_24HR_UP              | 2.0839722 | 0           | 3.16E-04 | 0.009 |
| WINNEPENNINCKX_MELANOMA_METASTASIS_UP            | 2.0779808 | 0           | 3.76E-04 | 0.011 |
| REACTOME_ESTROGEN_DEPENDENT_GENE_EXPRESSION      | 2.0615895 | 0           | 5.98E-04 | 0.018 |
| REACTOME_RESOLUTION_OF_SISTER_CHROMATID_COHESION | 2.0573964 | 0           | 6.13E-04 | 0.019 |
| REACTOME_MITOTIC_SPINDLE_CHECKPOINT              | 2.0537755 | 0           | 6.27E-04 | 0.02  |
| REACTOME_CONDENSATION_OF_PROPHASE_CHROMOSOMES    | 2.0329497 | 0.002493766 | 8.25E-04 | 0.026 |
| LE_EGR2_TARGETS_UP                               | 2.0322502 | 0           | 8.03E-04 | 0.026 |

|                                                             |           |   |             |       |
|-------------------------------------------------------------|-----------|---|-------------|-------|
| REACTOME_ANCHORING_OF_THE_BASAL_BODY_TO_THE_PLASMA_MEMBRANE | 2.0306015 | 0 | 7.83E-04    | 0.026 |
| EGUCHI_CELL_CYCLE_RB1_TARGETS                               | 2.0282447 | 0 | 8.20E-04    | 0.028 |
| SCIAN_CELL_CYCLE_TARGETS_OF_TP53_AND_TP73_DN                | 1.9873399 | 0 | 0.001951208 | 0.068 |
| PID_PLK1_PATHWAY                                            | 1.9849504 | 0 | 0.001958002 | 0.07  |
| FRASOR_RESPONSE_TO_SERM_OR_FULVESTRANT_DN                   | 1.9819345 | 0 | 0.00193893  | 0.071 |
| MARKEY_RB1_ACUTE_LOF_UP                                     | 1.9786162 | 0 | 0.002127043 | 0.08  |
| VILLANUEVA_LIVER_CANCER_KRT19_UP                            | 1.9650404 | 0 | 0.002630246 | 0.101 |
| BOYLAN_MULTIPLE_MYELOMA_C_CLUSTER_UP                        | 1.9550147 | 0 | 0.003185076 | 0.123 |
| REACTOME_CILIUM_ASSEMBLY                                    | 1.9529334 | 0 | 0.003307866 | 0.131 |
| REACTOME_RECRUITMENT_OF_NUMA_TO_MITOTIC_CENTROSOMES         | 1.9505787 | 0 | 0.003333106 | 0.135 |
| MISSIAGLIA_REGULATED_BY_METHYLATION_DN                      | 1.9478755 | 0 | 0.003494632 | 0.144 |
| BIDUS_METASTASIS_UP                                         | 1.9473819 | 0 | 0.00344734  | 0.145 |
| MORI_PRE_BI_LYMPHOCYTE_UP                                   | 1.9455134 | 0 | 0.003512422 | 0.149 |
| KAMMINGA_EZH2_TARGETS                                       | 1.9434797 | 0 | 0.003598506 | 0.155 |
| REACTOME_AURKA_ACTIVATION_BY_TPX2                           | 1.940215  | 0 | 0.003806792 | 0.165 |
| REACTOME_CENTROSOME_MATURATION                              | 1.9398818 | 0 | 0.003756979 | 0.166 |
| KEGG_CELL_CYCLE                                             | 1.9375675 | 0 | 0.003810356 | 0.169 |
| SARRIO_EPITHELIAL_MESENCHYMAL_TRANSITION_UP                 | 1.9238694 | 0 | 0.004790256 | 0.21  |
| REICHERT_MITOSIS_LIN9_TARGETS                               | 1.921107  | 0 | 0.004803975 | 0.215 |

|                                                         |           |             |             |       |
|---------------------------------------------------------|-----------|-------------|-------------|-------|
| LEE_INTRATHYMIC_T_PROGENITOR                            | 1.8992349 | 0           | 0.006741544 | 0.284 |
| PUJANA_BREAST_CANCER_WITH_BRCA1_MUTATED_UP              | 1.8976082 | 0           | 0.006740341 | 0.29  |
| REACTOME_M_PHASE                                        | 1.8946149 | 0           | 0.00677858  | 0.294 |
| REACTOME_G0_AND_EARLY_G1                                | 1.8726703 | 0           | 0.009422476 | 0.385 |
| NIKOLSKY_BREAST_CANCER_11Q12_Q14_AMPLICON               | 1.8725457 | 0           | 0.009307027 | 0.386 |
| REACTOME_REGULATION_OF_PLK1_ACTIVITY_AT_G2_M_TRANSITION | 1.870187  | 0           | 0.009624373 | 0.404 |
| REN_BOUND_BY_E2F                                        | 1.858378  | 0           | 0.011130267 | 0.458 |
| LI_WILMS_TUMOR_ANAPLASTIC_UP                            | 1.8537245 | 0           | 0.011687769 | 0.483 |
| PUJANA_BRCA_CENTERED_NETWORK                            | 1.8514025 | 0           | 0.012107926 | 0.502 |
| NIKOLSKY_BREAST_CANCER_5P15_AMPLICON                    | 1.8511715 | 0           | 0.011944018 | 0.502 |
| PID_FOXM1_PATHWAY                                       | 1.8493605 | 0           | 0.012051641 | 0.509 |
| YU_MYC_TARGETS_UP                                       | 1.8487412 | 0           | 0.011942365 | 0.511 |
| BIOCARTA_CELLCYCLE_PATHWAY                              | 1.8475375 | 0.002136752 | 0.012029561 | 0.519 |
| REACTOME_RHO_GTPASES_ACTIVATE_FORMINS                   | 1.8474107 | 0           | 0.011860131 | 0.519 |
| GRAHAM_CML_DIVIDING_VS_NORMAL_QUIESCENT_UP              | 1.8428758 | 0           | 0.012288833 | 0.532 |
| PID_E2F_PATHWAY                                         | 1.8269681 | 0           | 0.01509128  | 0.611 |
| VANTVEER_BREAST_CANCER_METASTASIS_DN                    | 1.8199339 | 0.002985075 | 0.016383277 | 0.655 |
| REACTOME_POLO_LIKE_KINASE_MEDIATED_EVENTS               | 1.8165848 | 0.002386635 | 0.017061645 | 0.673 |
| GREENBAUM_E2A_TARGETS_UP                                | 1.8112606 | 0           | 0.017858397 | 0.697 |
| WHITFIELD_CELL_CYCLE_S                                  | 1.8105603 | 0           | 0.017846128 | 0.701 |

|                                                                                                |           |             |             |       |
|------------------------------------------------------------------------------------------------|-----------|-------------|-------------|-------|
| MITSIADES_RESPONSE_TO_APLIDIN_DN                                                               | 1.808101  | 0           | 0.018284362 | 0.711 |
| LI_WILMS_TUMOR_VS_FETAL_KIDNEY_1_DN                                                            | 1.8059185 | 0           | 0.018564407 | 0.718 |
| FERRANDO_HOX11_NEIGHBORS                                                                       | 1.7990166 | 0           | 0.020123536 | 0.754 |
| XU_HGF_TARGETS_INDUCED_BY_AKT1_48HR_DN                                                         | 1.7990162 | 0.002267574 | 0.019875098 | 0.754 |
| REACTOME_MEIOTIC_RECOMBINATION                                                                 | 1.7980156 | 0           | 0.01999018  | 0.76  |
| MOLENAAR_TARGETS_OF_CCND1_AND_CDK4_DN                                                          | 1.796716  | 0           | 0.02010384  | 0.764 |
| REACTOME_PHASE_2_PLATEAU_PHASE                                                                 | 1.7954106 | 0.006864989 | 0.020266967 | 0.77  |
| REACTOME_CELL_CYCLE_CHECKPOINTS                                                                | 1.7784805 | 0           | 0.024970304 | 0.837 |
| WU_APOPTOSIS_BY_CDKN1A_VIA_TP53                                                                | 1.7737756 | 0           | 0.026327986 | 0.853 |
| REACTOME_RUNX1_REGULATES_GENES_INVOLVED_IN_MEGAKARYOCYTE_DIFFERENTIATION_AND_PLATELET_FUNCTION | 1.7736678 | 0           | 0.026089817 | 0.855 |
| BLUM_RESPONSE_TO_SALIRASIB_DN                                                                  | 1.7711926 | 0           | 0.026590629 | 0.866 |
| SHEDDEN_LUNG_CANCER_POOR_SURVIVAL_A6                                                           | 1.7616456 | 0           | 0.029729892 | 0.896 |
| DAZARD_RESPONSE_TO_UV_SCC_DN                                                                   | 1.7609289 | 0           | 0.02973926  | 0.897 |
| CHEN_ETV5_TARGETS_TESTIS                                                                       | 1.754247  | 0           | 0.03230947  | 0.919 |
| STEIN_ESRRA_TARGETS_RESPONSIVE_TO_ESTROGEN_DN                                                  | 1.7515812 | 0.002463054 | 0.032910872 | 0.927 |
| FUJII_YBX1_TARGETS_DN                                                                          | 1.7509458 | 0           | 0.032835007 | 0.928 |
| NIKOLSKY_BREAST_CANCER_6P24_P22_AMPLICON                                                       | 1.748601  | 0.009090909 | 0.033489812 | 0.934 |
| SMID_BREAST_CANCER_RELAPSE_IN_BRAIN_UP                                                         | 1.7485241 | 0           | 0.03318446  | 0.936 |
| BIOCARTA_NKCELLS_PATHWAY                                                                       | 1.739608  | 0           | 0.036701787 | 0.951 |
| BIOCARTA_CARDIACEGF_PATHWAY                                                                    | 1.7379438 | 0.004535148 | 0.036893185 | 0.951 |

|                                                                                             |           |             |             |       |
|---------------------------------------------------------------------------------------------|-----------|-------------|-------------|-------|
| REACTOME_SUMOYLATION_OF_TRANSCRIPTION_COFACTORS                                             | 1.7321919 | 0           | 0.03914541  | 0.957 |
| FERREIRA_EWINGS_SARCOMA_UNSTABLE_VS_STABLE_UP                                               | 1.7315838 | 0           | 0.0390006   | 0.958 |
| CHIARETTI_T_ALL_REFRACTORY_TO_THERAPY                                                       | 1.7312571 | 0           | 0.038733505 | 0.961 |
| SHEPARD_CRUSH_AND_BURN_MUTANT_DN                                                            | 1.722888  | 0           | 0.042453364 | 0.97  |
| REACTOME_MICRORNA_MIRNA_BIOGENESIS                                                          | 1.7225937 | 0.00248139  | 0.042181052 | 0.971 |
| REACTOME_CHROMOSOME_MAINTENANCE                                                             | 1.7223829 | 0.002915452 | 0.04190224  | 0.972 |
| REACTOME_TRANSCRIPTIONAL_REGULATION_OF_GRANULOPOIESIS                                       | 1.715618  | 0.0025      | 0.044637498 | 0.983 |
| BENPORATH_PROLIFERATION                                                                     | 1.7127804 | 0           | 0.046000637 | 0.985 |
| CHICAS_RB1_TARGETS_GROWING                                                                  | 1.7126993 | 0           | 0.045619912 | 0.985 |
| HOEGERKORP_CD44_TARGETS_TEMPORAL_DN                                                         | 1.7074517 | 0.006993007 | 0.048055124 | 0.988 |
| REACTOME_RUNX1_INTERACTS_WITH_CO_FACTORS_WHOSE_PRECISE_EFFECT_ON_RUNX1_TARGETS_IS_NOT_KNOWN | 1.7073276 | 0.004914005 | 0.047703367 | 0.988 |
| GRAHAM_NORMAL QUIESCENT_VS_NORMAL_DIVIDING_DN                                               | 1.7072449 | 0           | 0.04728654  | 0.988 |
| BIOCARTA_LIS1_PATHWAY                                                                       | 1.7056676 | 0.002336449 | 0.047585946 | 0.988 |
| FISCHER_G1_S_CELL_CYCLE                                                                     | 1.7047962 | 0           | 0.047531232 | 0.988 |
| REACTOME_DNA_METHYLATION                                                                    | 1.7047569 | 0.007125891 | 0.04711706  | 0.988 |
| WNT_SIGNALING                                                                               | 1.7043931 | 0           | 0.046819713 | 0.988 |
| WANG_METASTASIS_OF_BREAST_CANCER_ESR1_UP                                                    | 1.6963913 | 0.004926108 | 0.050687183 | 0.992 |
| CAFFAREL_RESPONSE_TO_THC_24HR_5_DN                                                          | 1.692208  | 0           | 0.052713137 | 0.995 |
| BIOCARTA_CXCR4_PATHWAY                                                                      | 1.6916965 | 0           | 0.052560955 | 0.995 |

|                                                                                                        |           |             |             |       |
|--------------------------------------------------------------------------------------------------------|-----------|-------------|-------------|-------|
| ZHAN_MULTIPLE_MYELOMA_MF_DN                                                                            | 1.6913755 | 0.010362694 | 0.05219893  | 0.995 |
| REACTOME_ORGANELLE_BIOGENESIS_AND_MAINTENANCE                                                          | 1.6909205 | 0           | 0.05204177  | 0.995 |
| REACTOME_ACTIVATION_OF_HOX_GENES_DURING_DIFFERENTIATION                                                | 1.6895152 | 0.002793296 | 0.052467946 | 0.995 |
| PID_ATR_PATHWAY                                                                                        | 1.6883637 | 0           | 0.052640475 | 0.996 |
| NIKOLSKY_BREAST_CANCER_8Q23_Q24_AMPLICON                                                               | 1.6838452 | 0           | 0.054611012 | 0.997 |
| REACTOME_RHO_GTPASE_EFFECTORS                                                                          | 1.6827174 | 0           | 0.054791074 | 0.997 |
| REACTOME_G1_S_SPECIFIC_TRANSCRIPTION                                                                   | 1.6811156 | 0.007462686 | 0.055318553 | 0.997 |
| REACTOME_ACTIVATED_PKN1_STIMULATES_TRANSCRIPTION_OF_AR_ANDROGEN_RECEPTOR_REGULATED_GENES_KLK2_AND_KLK3 | 1.6802119 | 0.004415011 | 0.05538973  | 0.997 |
| BURTON_ADIPOGENESIS_PEAK_AT_24HR                                                                       | 1.6788143 | 0           | 0.055775832 | 0.997 |
| PID_MYC_REPRESS_PATHWAY                                                                                | 1.6785774 | 0           | 0.055449203 | 0.997 |
| WHITFIELD_CELL_CYCLE_G2_M                                                                              | 1.676484  | 0           | 0.05639429  | 0.997 |
| REACTOME_KINESINS                                                                                      | 1.6761293 | 0.005347594 | 0.056181654 | 0.997 |
| GEORGES_CELL_CYCLE_MIR192_TARGETS                                                                      | 1.6724656 | 0           | 0.057818405 | 0.998 |
| PID_ATM_PATHWAY                                                                                        | 1.6714168 | 0.00511509  | 0.057935867 | 0.999 |
| REACTOME_MITOTIC_G2_G2_M_PHASES                                                                        | 1.6704264 | 0           | 0.058111954 | 0.999 |
| SIMBULAN_PARP1_TARGETS_DN                                                                              | 1.6699834 | 0.015384615 | 0.057909016 | 0.999 |
| BURTON_ADIPOGENESIS_12                                                                                 | 1.6697768 | 0.007633588 | 0.057625193 | 0.999 |
| REACTOME_SUMOYLATION                                                                                   | 1.6678945 | 0           | 0.058314055 | 0.999 |

|                                                              |           |             |             |       |
|--------------------------------------------------------------|-----------|-------------|-------------|-------|
| SHEPARD_BMYB_TARGETS                                         | 1.6676042 | 0           | 0.058073737 | 0.999 |
| REACTOME_NUCLEOSOME_ASSEMBLY                                 | 1.6660588 | 0.002604167 | 0.058556043 | 0.999 |
| BIOCARTA_SHH_PATHWAY                                         | 1.6604596 | 0.008714597 | 0.061482407 | 0.999 |
| LY_AGING_MIDDLE_DN                                           | 1.660082  | 0.015765766 | 0.061240334 | 0.999 |
| PID_ILK_PATHWAY                                              | 1.6566696 | 0.005347594 | 0.06287279  | 1     |
| KAUFFMANN_DNA_REPAIR_GENES                                   | 1.6562961 | 0           | 0.062689595 | 1     |
| BENPORATH_ES_CORE_NINE_CORRELATED                            | 1.6551712 | 0           | 0.062923044 | 1     |
| FARMER_BREAST_CANCER_CLUSTER_2                               | 1.655091  | 0.004683841 | 0.06251131  | 1     |
| REACTOME_ACTIVATION_OF_THE_PRE_REPLICATIVE_COMPLEX           | 1.6548798 | 0.007594937 | 0.062215112 | 1     |
| PETROVA_PROX1_TARGETS_UP                                     | 1.6544493 | 0.011655011 | 0.062149927 | 1     |
| REACTOME_PRC2_METHYLATES_HISTONES_AND_DNA                    | 1.6540163 | 0.007894737 | 0.061977513 | 1     |
| REACTOME_ACTIVATION_OF_ATR_IN_RESPONSE_TO_REPLICATION_STRESS | 1.6532259 | 0.002512563 | 0.062039282 | 1     |
| RHODES_UNDIFFERENTIATED_CANCER                               | 1.6511396 | 0.005263158 | 0.063217536 | 1     |
| LINDGREN_BLADDER_CANCER_CLUSTER_3_UP                         | 1.6496192 | 0           | 0.06366764  | 1     |
| WEST_ADRENOCORTICAL_TUMOR_MARKERS_DN                         | 1.6472436 | 0.006564552 | 0.064753406 | 1     |
| REACTOME_GENE_SILENCING_BY_RNA                               | 1.64006   | 0.006514658 | 0.06893448  | 1     |
| REACTOME_ESR_MEDIATED_SIGNALING                              | 1.6396973 | 0           | 0.06875286  | 1     |
| KORKOLA_EMBRYONIC_CARCINOMA_VS_SEMINOMA_DN                   | 1.634234  | 0.013605442 | 0.07187294  | 1     |
| REACTOME_SIRT1_NEGATIVELY_REGULATES_RRNA_EXPRESSION          | 1.6316618 | 0.007712083 | 0.07315243  | 1     |



|                                                                  |           |             |             |   |
|------------------------------------------------------------------|-----------|-------------|-------------|---|
| SAGIV_CD24_TARGETS_UP                                            | 1.6301597 | 0.011337869 | 0.0738318   | 1 |
| CHANDRAN_METASTASIS_UP                                           | 1.6294489 | 0           | 0.07380701  | 1 |
| REACTOME_HSP90_CHAPERONE_CYCLE_FOR_STEROID_HORMONE_RECEPTORS_SHR | 1.6257005 | 0.010610079 | 0.07584289  | 1 |
| HU_GENOTOXIN_ACTION_DIRECT_VS_INDIRECT_4HR                       | 1.6213319 | 0.010282776 | 0.0785933   | 1 |
| RIZ_ERYTHROID_DIFFERENTIATION_CCNE1                              | 1.6201108 | 0.010075566 | 0.079067774 | 1 |
| FINETTI_BREAST_CANCER_KINOME_RED                                 | 1.619923  | 0.033333335 | 0.0787259   | 1 |
| CROONQUIST_NRAS_VS_STROMAL_STIMULATION_DN                        | 1.6176969 | 0           | 0.07995545  | 1 |
| SONG_TARGETS_OF_IE86_CMV_PROTEIN                                 | 1.6154827 | 0.00511509  | 0.081220165 | 1 |
| REACTOME_TRANSCRIPTIONAL_REGULATION_BY_E2F6                      | 1.6137792 | 0.002444988 | 0.08219328  | 1 |
| BOYALT_LIVER_CANCER_SUBCLASS_G23_UP                              | 1.6132226 | 0.002717391 | 0.08222023  | 1 |
| REACTOME_PHOSPHORYLATION_OF_THE_APC_C                            | 1.6118261 | 0.017777778 | 0.082826175 | 1 |
| NAKAYAMA_SOFT_TISSUE_TUMORS_PCA2_UP                              | 1.6100723 | 0           | 0.08377997  | 1 |
| HORIUCHI_WTAP_TARGETS_DN                                         | 1.6099924 | 0           | 0.08336327  | 1 |
| PID_ERA_GENOMIC_PATHWAY                                          | 1.6074307 | 0.005617978 | 0.08497857  | 1 |
| REACTOME_SENESCENCE_ASSOCIATED_SECRETORY_PHENOTYPE_SASP          | 1.6054115 | 0.002739726 | 0.0860741   | 1 |
| KRIGE_AMINO_ACID_DEPRIVATION                                     | 1.6037489 | 0.005037783 | 0.08698351  | 1 |
| REACTOME_CHROMATIN_ORGANIZATION                                  | 1.6037115 | 0           | 0.08650477  | 1 |
| REACTOME_MITOTIC_METAPHASE_AND_ANAPHASE                          | 1.5977839 | 0           | 0.09052724  | 1 |
| JEON_SMAD6_TARGETS_DN                                            | 1.5936985 | 0.013392857 | 0.093604736 | 1 |

|                                                                                                                                      |           |             |             |   |
|--------------------------------------------------------------------------------------------------------------------------------------|-----------|-------------|-------------|---|
| CHIARETTI_T_ALL_RELAPSE_PROGNOSIS                                                                                                    | 1.5930629 | 0.020454545 | 0.09359729  | 1 |
| TANG_SENESCENCE_TP53_TARGETS_DN                                                                                                      | 1.5907834 | 0.005333333 | 0.09506076  | 1 |
| REACTOME_TRANSCRIPTIONAL_REGULATION_BY_SMALL_RNAS                                                                                    | 1.5905825 | 0.00591716  | 0.09469149  | 1 |
| WELCH_GATA1_TARGETS                                                                                                                  | 1.5902011 | 0.012195122 | 0.09440494  | 1 |
| REACTOME_CELLULAR_SENESCENCE                                                                                                         | 1.588542  | 0           | 0.095247634 | 1 |
| REACTOME_INHIBITION_OF_THE_PROTEOLYTIC_ACTIVITY_OF_APC_C_REQUIRED_FOR_THE_ONSET_OF_ANAPHASE_BY_MITOTIC_SPINDLE_CHECKPOINT_COMPONENTS | 1.5860171 | 0.017817372 | 0.09694301  | 1 |
| REACTOME_PHOSPHORYLATION_OF_CD3_AND_TCR_ZETA_CHAINS                                                                                  | 1.5841858 | 0.030023094 | 0.098165356 | 1 |
| GROSS_HYPOXIA_VIA_ELK3_UP                                                                                                            | 1.5833834 | 0           | 0.09826684  | 1 |
| KAUFFMANN_MELANOMA_RELAPSE_UP                                                                                                        | 1.5814794 | 0.007915568 | 0.09944139  | 1 |
| PID_CMYB_PATHWAY                                                                                                                     | 1.580526  | 0.002941177 | 0.099725515 | 1 |
| BOYLAN_MULTIPLE_MYELOMA_C_UP                                                                                                         | 1.576728  | 0.007853403 | 0.10263729  | 1 |
| REACTOME_CONVERSION_FROM_APC_C:CDC20_TO_APC_C:CDH1_IN_LATE_ANAPHASE                                                                  | 1.5759332 | 0.030588236 | 0.10295391  | 1 |
| PYEON_CANCER_HEAD_AND_NECK_VS_CERVICAL_UP                                                                                            | 1.5739174 | 0           | 0.104110666 | 1 |
| BIOCARTA_CREB_PATHWAY                                                                                                                | 1.5722034 | 0.021327015 | 0.10528702  | 1 |
| REACTOME_MECP2_REGULATES_NEURONAL_RECEPTORS_AND_CHANNELS                                                                             | 1.5711719 | 0.029279279 | 0.10557187  | 1 |
| PID_AURORA_B_PATHWAY                                                                                                                 | 1.569718  | 0.01058201  | 0.1063805   | 1 |

|                                                                                |           |             |             |   |
|--------------------------------------------------------------------------------|-----------|-------------|-------------|---|
| REACTOME_RMTS_METHYLATE_HISTONE_ARGININES                                      | 1.5687277 | 0.005420054 | 0.10676791  | 1 |
| REACTOME_HOMOLOGOUS_DNA_PAIRING_AND_STRAND_EXCHANGE                            | 1.5664504 | 0.013297873 | 0.108192705 | 1 |
| PID_BETA_CATENIN_DEG_PATHWAY                                                   | 1.5660653 | 0.030303031 | 0.10809131  | 1 |
| NADERI_BREAST_CANCER_PROGNOSIS_UP                                              | 1.5643373 | 0.007832898 | 0.109244905 | 1 |
| BIOCARTA_STATHMIN_PATHWAY                                                      | 1.5635334 | 0.03736264  | 0.10941621  | 1 |
| TSENG_ADIPOGENIC_POTENTIAL_UP                                                  | 1.5599707 | 0.015463918 | 0.11208535  | 1 |
| REACTOME_SUMOYLATION_OF_CHROMATIN_ORGANIZATION_PROTEINS                        | 1.5592587 | 0.013333334 | 0.11218353  | 1 |
| SMID_BREAST_CANCER_LUMINAL_A_DN                                                | 1.5567867 | 0.022988506 | 0.11385774  | 1 |
| REACTOME_TRANSCRIPTION_OF_E2F_TARGETS_UNDER_NEGATIVE_CONTROL_BY_DREAM_COMPLEX  | 1.5550869 | 0.01904762  | 0.11487337  | 1 |
| BOYLAN_MULTIPLE_MYELOMA_D_CLUSTER_DN                                           | 1.5533974 | 0.02184466  | 0.11595088  | 1 |
| REACTOME_TELOMERE_MAINTENANCE                                                  | 1.5480257 | 0.00862069  | 0.12052504  | 1 |
| RIZ_ERYTHROID_DIFFERENTIATION                                                  | 1.5470319 | 0.012048192 | 0.12102276  | 1 |
| SCIBETTA_KDM5B_TARGETS_DN                                                      | 1.5458677 | 0.002857143 | 0.12158328  | 1 |
| REACTOME_EPHRIN_SIGNALING                                                      | 1.5457683 | 0.033707865 | 0.12106481  | 1 |
| VECCHI_GASTRIC_CANCER_EARLY_UP                                                 | 1.5449321 | 0           | 0.12127242  | 1 |
| REACTOME_FACTORS_INVOLVED_IN_MEGAKARYOCYTE_DEVELOPMENT_AND_PLATELET_PRODUCTION | 1.5443289 | 0.003355705 | 0.12138854  | 1 |
| MAGRANGEAS_MULTIPLE_MYELOMA_IGLL_VS_IGLK_UP                                    | 1.5432917 | 0.009501188 | 0.1219693   | 1 |

|                                                                    |           |             |             |   |
|--------------------------------------------------------------------|-----------|-------------|-------------|---|
| REACTOME_VEGFR2_MEDIATED_CELL_PROLIFERATION                        | 1.5422083 | 0.029017856 | 0.12244837  | 1 |
| KARAKAS_TGFB1_SIGNALING                                            | 1.5401033 | 0.018691588 | 0.124279805 | 1 |
| ZHANG_BREAST_CANCER_PROGENITORS_UP                                 | 1.5354903 | 0           | 0.12847817  | 1 |
| BIOCARTA_TPO_PATHWAY                                               | 1.5343614 | 0.03422983  | 0.12902795  | 1 |
| FOURNIER_ACINAR_DEVELOPMENT_LATE_DN                                | 1.5322347 | 0.025056947 | 0.13076764  | 1 |
| REACTOME_MITOTIC_PROPHASE                                          | 1.531475  | 0.003367003 | 0.13094416  | 1 |
| REACTOME_REGULATION_OF_TP53_ACTIVITY_THROUGH_PHOSPHORYLATION       | 1.5299132 | 0.002890173 | 0.13203731  | 1 |
| REACTOME_DNA_STRAND_ELONGATION                                     | 1.5287586 | 0.019512195 | 0.1326577   | 1 |
| PID_AURORA_A_PATHWAY                                               | 1.5284656 | 0.012755103 | 0.13237298  | 1 |
| SENGUPTA_NASOPHARYNGEAL_CARCINOMA_UP                               | 1.5274581 | 0           | 0.13293129  | 1 |
| GOLUB_ALL_VS_AML_UP                                                | 1.5245302 | 0.019138755 | 0.13562489  | 1 |
| REACTOME_SIGNALING_BY_NTRK2_TRKB                                   | 1.5206816 | 0.030303031 | 0.13926364  | 1 |
| BIOCARTA_GH_PATHWAY                                                | 1.51834   | 0.026190476 | 0.14131416  | 1 |
| KEGG_AXON_GUIDANCE                                                 | 1.5182483 | 0.003194888 | 0.14075078  | 1 |
| REACTOME_G2_M_DNA_DAMAGE_CHECKPOINT                                | 1.5175227 | 0.009118541 | 0.140959    | 1 |
| REACTOME_FORMATION_OF_THE_BETA_CATENIN:TCF_TRANSACTIVATING_COMPLEX | 1.5169766 | 0.005555556 | 0.14098907  | 1 |
| WHITFIELD_CELL_CYCLE_G1_S                                          | 1.5166395 | 0.002994012 | 0.1407393   | 1 |
| REACTOME_DNA_DOUBLE_STRAND_BREAK_REPAIR                            | 1.5163386 | 0.006557377 | 0.14042047  | 1 |
| GUTIERREZ_CHRONIC_LYMPHOCYTIC_LEUKEMIA_DN                          | 1.5148233 | 0.008108108 | 0.14150903  | 1 |

|                                                         |           |             |            |   |
|---------------------------------------------------------|-----------|-------------|------------|---|
| BIOCARTA_MCALPAIN_PATHWAY                               | 1.5142745 | 0.045652173 | 0.14143796 | 1 |
| REACTOME_PROCESSING_OF_DNA_DOUBLE_STRAND_BREAK_ENDS     | 1.5121379 | 0.020057306 | 0.14328359 | 1 |
| ROVERSI_GLIOMA_COPY_NUMBER_UP                           | 1.5104823 | 0.002881844 | 0.14459954 | 1 |
| REACTOME_TRAFFICKING_OF_GLUR2_CONTAINING_AMPA_RECEPTORS | 1.5092916 | 0.03167421  | 0.14536539 | 1 |
| REACTOME_PLATELET_SENSITIZATION_BY_LDL                  | 1.5081981 | 0.04017857  | 0.14594518 | 1 |
| PID_WNT_CANONICAL_PATHWAY                               | 1.5066061 | 0.037444934 | 0.14707907 | 1 |
| XU_HGF_SIGNALING_NOT_VIA_AKT1_48HR_DN                   | 1.5029361 | 0.057268724 | 0.15095648 | 1 |
| MORI_EMU_MYC_LYMPHOMA_BY_ONSET_TIME_UP                  | 1.5018317 | 0           | 0.15167251 | 1 |
| PUJANA_BREAST_CANCER_LIT_INT_NETWORK                    | 1.5014455 | 0.014880952 | 0.15151377 | 1 |
| REACTOME_SYNAPTIC_ADHESION_LIKE_MOLECULES               | 1.5014001 | 0.028199567 | 0.15093343 | 1 |
| REACTOME_DEPURINATION                                   | 1.5003222 | 0.04157044  | 0.15166713 | 1 |
| REACTOME_DOWNSTREAM_SIGNAL_TRANSDUCTION                 | 1.4998354 | 0.025114154 | 0.15158042 | 1 |
| REACTOME_OXIDATIVE_STRESS_INDUCED_SENESCENCE            | 1.4995217 | 0.005747126 | 0.15128733 | 1 |
| PID_NCADHERIN_PATHWAY                                   | 1.4991837 | 0.024570024 | 0.15101169 | 1 |
| NAKAMURA_CANCER_MICROENVIRONMENT_DN                     | 1.4988761 | 0.024937656 | 0.15075211 | 1 |
| CHIANG_LIVER_CANCER_SUBCLASS_PROLIFERATION_UP           | 1.4972266 | 0           | 0.15206458 | 1 |
| REACTOME_HOMOLOGY_DIRECTED_REPAIR                       | 1.4954607 | 0.003389831 | 0.15340045 | 1 |
| REACTOME_ONCOGENE_INDUCED_SENESCENCE                    | 1.4954339 | 0.028571429 | 0.15281305 | 1 |
| LIU_VAV3_PROSTATE_CARCINOGENESIS_DN                     | 1.4953685 | 0.043956045 | 0.15222575 | 1 |

|                                                  |           |             |            |   |
|--------------------------------------------------|-----------|-------------|------------|---|
| MARIADASON_RESPONSE_TO_BUTYRATE_SULINDAC_6       | 1.4947386 | 0.013333334 | 0.15232939 | 1 |
| BIOCARTA_WNT_PATHWAY                             | 1.4933034 | 0.029411765 | 0.1535057  | 1 |
| PID_FANCONI_PATHWAY                              | 1.4918599 | 0.007653061 | 0.15474224 | 1 |
| GENTILE_UV_RESPONSE_CLUSTER_D2                   | 1.4904152 | 0.023684211 | 0.15589976 | 1 |
| KEGG_WNT_SIGNALING_PATHWAY                       | 1.4893903 | 0           | 0.15638044 | 1 |
| BIOCARTA_MCM_PATHWAY                             | 1.4848855 | 0.041394334 | 0.1611302  | 1 |
| VERNELL_RETINOBLASTOMA_PATHWAY_UP                | 1.4847324 | 0.016       | 0.16073398 | 1 |
| REACTOME_SIGNALING_BY_RHO_GTPASES                | 1.4835545 | 0           | 0.16144314 | 1 |
| PID_VEGFR1_PATHWAY                               | 1.4834596 | 0.0315534   | 0.16091837 | 1 |
| ACEVEDO_LIVER_CANCER_WITH_H3K9ME3_DN             | 1.483     | 0.008450705 | 0.16080742 | 1 |
| DUAN_PRDM5_TARGETS                               | 1.4822111 | 0.013736264 | 0.16112813 | 1 |
| REACTOME_GOLGI_TO_ER_RETROGRADE_TRANSPORT        | 1.479953  | 0           | 0.16347022 | 1 |
| REACTOME_HDR_THROUGH_SINGLE_STRAND_ANNEALING_SSA | 1.4793144 | 0.03640777  | 0.16356106 | 1 |
| CHIN_BREAST_CANCER_COPY_NUMBER_UP                | 1.4787121 | 0.03678161  | 0.16356882 | 1 |
| LINDGREN_BLADDER_CANCER_WITH_LOH_IN_CHR9Q        | 1.4779822 | 0.006493507 | 0.16385132 | 1 |
| BIOCARTA_GLEEVEC_PATHWAY                         | 1.4769732 | 0.044705883 | 0.1645649  | 1 |
| CREIGHTON_ENDOCRINE_THERAPY_RESISTANCE_2         | 1.4768361 | 0           | 0.16410033 | 1 |
| REACTOME_HIV_LIFE_CYCLE                          | 1.4758247 | 0           | 0.16491452 | 1 |
| STANELLE_E2F1_TARGETS                            | 1.4753851 | 0.04450262  | 0.16485977 | 1 |
| CHAUHAN_RESPONSE_TO_METHOXYESTRADIOL_UP          | 1.4751319 | 0.034946237 | 0.16458799 | 1 |
| LE_NEURONAL_DIFFERENTIATION_DN                   | 1.4746631 | 0.046563193 | 0.16455829 | 1 |

|                                                          |           |             |            |   |
|----------------------------------------------------------|-----------|-------------|------------|---|
| REACTOME_SIGNALING_BY_SCF_KIT                            | 1.4713645 | 0.029776676 | 0.16827428 | 1 |
| REACTOME_HATS_ACETYLATE_HISTONES                         | 1.4699416 | 0.005988024 | 0.16943872 | 1 |
| BIOCARTA_G1_PATHWAY                                      | 1.4690872 | 0.04398148  | 0.16986549 | 1 |
| WEST_ADRENOCORTICAL_TUMOR_UP                             | 1.468066  | 0           | 0.17048253 | 1 |
| BIOCARTA_BIOPEPTIDES_PATHWAY                             | 1.4676942 | 0.031007752 | 0.17036776 | 1 |
| REACTOME_NONHOMOLOGOUS_END_JOINING_NHEJ                  | 1.4667764 | 0.018229166 | 0.17093731 | 1 |
| HUMMEL_BURKITTS_LYMPHOMA_UP                              | 1.4660558 | 0.02116402  | 0.17113338 | 1 |
| WILCOX_RESPONSE_TO_PROGESTERONE_UP                       | 1.4656479 | 0.003205128 | 0.17108202 | 1 |
| CAFFAREL_RESPONSE_TO_THC_UP                              | 1.464835  | 0.0495283   | 0.17155428 | 1 |
| BIOCARTA_PITX2_PATHWAY                                   | 1.4641731 | 0.06726457  | 0.17185321 | 1 |
| REACTOME_INTRAFLAGELLAR_TRANSPORT                        | 1.4634087 | 0.031088082 | 0.17227033 | 1 |
| DAZARD_RESPONSE_TO_UV_NHEK_DN                            | 1.4624263 | 0           | 0.17307858 | 1 |
| PID_HDAC_CLASSIII_PATHWAY                                | 1.4619179 | 0.035955057 | 0.17318751 | 1 |
| BROWNE_HCMV_INFECTION_10HR_UP                            | 1.46061   | 0.008219178 | 0.17430879 | 1 |
| HOFFMANN_SMALL_PRE_BII_TO_IMMATURE_B_LYMPHOCYTE_D<br>N   | 1.4593273 | 0.020356234 | 0.17534634 | 1 |
| TONKS_TARGETS_OF_RUNX1_RUNX1T1_FUSION_ERYTHROCYTE<br>_DN | 1.457568  | 0.038990825 | 0.176979   | 1 |
| REACTOME_MEIOSIS                                         | 1.4545375 | 0.019886363 | 0.18024829 | 1 |
| PID_CD8_TCR_PATHWAY                                      | 1.4522064 | 0.022922637 | 0.18272774 | 1 |
| PID_P38_ALPHA_BETA_PATHWAY                               | 1.4516759 | 0.040963855 | 0.18280987 | 1 |

|                                                                                        |           |             |            |   |
|----------------------------------------------------------------------------------------|-----------|-------------|------------|---|
| REACTOME_SIGNALING_BY_FGFR_IN_DISEASE                                                  | 1.4512995 | 0.010958904 | 0.18265928 | 1 |
| SHEN_SMARCA2_TARGETS_UP                                                                | 1.4511172 | 0           | 0.18221654 | 1 |
| REACTOME_RNA_POLYMERASE_II_TRANSCRIPTION_PRE_INITIATION_AND_PROMOTER_OPENING           | 1.451114  | 0.027777778 | 0.18158324 | 1 |
| BROWNE_HCMV_INFECTION_14HR_UP                                                          | 1.44946   | 0.003289474 | 0.183082   | 1 |
| TOYOTA_TARGETS_OF_MIR34B_AND_MIR34C                                                    | 1.448047  | 0           | 0.18437932 | 1 |
| BIOCARTA_MET_PATHWAY                                                                   | 1.4468422 | 0.044665013 | 0.18531907 | 1 |
| HOLLEMAN_PREDNISOLONE_RESISTANCE_B_ALL_UP                                              | 1.4466814 | 0.065375306 | 0.18487023 | 1 |
| KIM_WT1_TARGETS_DN                                                                     | 1.4441772 | 0           | 0.18754812 | 1 |
| AFFAR_YY1_TARGETS_DN                                                                   | 1.4435756 | 0           | 0.18759575 | 1 |
| RIZ_ERYTHROID_DIFFERENTIATION_HEMGN                                                    | 1.4413624 | 0.06026786  | 0.19010872 | 1 |
| NUNODA_RESPONSE_TO_DASATINIB_IMATINIB_UP                                               | 1.441174  | 0.06188119  | 0.18973751 | 1 |
| REACTOME_TRANSCRIPTIONAL_REGULATION_BY_THE_AP_2_TF_AP2_FAMILY_OF_TRANSCRIPTION_FACTORS | 1.4411255 | 0.06855792  | 0.1891561  | 1 |
| REACTOME_TP53_REGULATES_TRANSCRIPTION_OF_CELL_CYCLE_GENES                              | 1.4398594 | 0.043715846 | 0.19032942 | 1 |
| MCCLUNG_DELTA_FOSB_TARGETS_8WK                                                         | 1.4394022 | 0.01946472  | 0.19030033 | 1 |
| SU_TESTIS                                                                              | 1.4380478 | 0.028735632 | 0.19131704 | 1 |
| HASLINGER_B_CLL_WITH_MUTATED_VH_GENES                                                  | 1.4372569 | 0.07111111  | 0.19181342 | 1 |
| GENTILE_RESPONSE_CLUSTER_D3                                                            | 1.4367853 | 0.031007752 | 0.1918333  | 1 |
| REACTOME_MITOTIC_G1_G1_S_PHASES                                                        | 1.4360384 | 0           | 0.19223604 | 1 |



|                                                                                            |           |             |            |   |
|--------------------------------------------------------------------------------------------|-----------|-------------|------------|---|
| PID_EPHRINB_REV_PATHWAY                                                                    | 1.4357646 | 0.052757792 | 0.19198298 | 1 |
| MMS_MOUSE_LYMPH_HIGH_4HRS_UP                                                               | 1.4349953 | 0.037593983 | 0.1924327  | 1 |
| REACTOME_DNA_DAMAGE_TELOMERE_STRESS_INDUCED_SENESCENCE                                     | 1.4321328 | 0.024657534 | 0.19572963 | 1 |
| REACTOME_METABOLISM_OF_ANGIOTENSINOGEN_TO_ANGIOTENSINS                                     | 1.4313797 | 0.091116175 | 0.19612467 | 1 |
| REACTOME_DAP12_SIGNALING                                                                   | 1.4296994 | 0.06896552  | 0.19797783 | 1 |
| KEGG_BLADDER_CANCER                                                                        | 1.4292397 | 0.04197531  | 0.19798788 | 1 |
| REACTOME_LAGGING_STRAND_SYNTHESIS                                                          | 1.4287214 | 0.046357617 | 0.19805093 | 1 |
| HOEBEKE_LYMPHOID_STEM_CELL_UP                                                              | 1.4284127 | 0.013927577 | 0.19778211 | 1 |
| REACTOME_COPI_DEPENDENT_GOLGI_TO_ER_RETROGRADE_TRANSPORT                                   | 1.4275863 | 0.008982036 | 0.198326   | 1 |
| REACTOME_BASE_EXCISION_REPAIR_AP_SITE_FORMATION                                            | 1.4268004 | 0.04040404  | 0.19879141 | 1 |
| PID_ERBB1_RECEPTOR_PROXIMAL_PATHWAY                                                        | 1.4266664 | 0.050890584 | 0.19834228 | 1 |
| REACTOME_DEACTIVATION_OF_THE_BETA_CATENIN_TRANSDUCTION_COMPLEX                             | 1.4263501 | 0.041666668 | 0.19813924 | 1 |
| REACTOME_RESOLUTION_OF_D_LOOP_STRUCTURES_THROUGH_SYNTHESIS_DEPENDENT_STRAND_ANNEALING_SDSA | 1.425471  | 0.058295965 | 0.19871856 | 1 |
| REACTOME_HDACS_DEACETYLATE_HISTONES                                                        | 1.423769  | 0.02259887  | 0.20053054 | 1 |
| REACTOME_POST_CHAPERONIN_TUBULIN_FOLDING_PATHWAY                                           | 1.4230014 | 0.05689278  | 0.20096856 | 1 |
| CLIMENT_BREAST_CANCER_COPY_NUMBER_UP                                                       | 1.4218708 | 0.067307696 | 0.2020477  | 1 |

|                                                                                         |           |             |            |   |
|-----------------------------------------------------------------------------------------|-----------|-------------|------------|---|
| DUTERTRE ESTRADIOL RESPONSE 6HR DN                                                      | 1.4208399 | 0.021943573 | 0.20303978 | 1 |
| NIKOLSKY BREAST CANCER 15Q26 AMPLICON                                                   | 1.4198278 | 0.06142506  | 0.2037498  | 1 |
| KEGG BASAL TRANSCRIPTION FACTORS                                                        | 1.4168243 | 0.04134367  | 0.20728956 | 1 |
| IVANOVA HEMATOPOIESIS STEM CELL SHORT TERM                                              | 1.4160458 | 0.06928407  | 0.20796885 | 1 |
| PEART HDAC PROLIFERATION CLUSTER DN                                                     | 1.4153479 | 0.019354839 | 0.20828418 | 1 |
| REACTOME SIGNALING BY CYTOSOLIC FGFR1 FUSION MUTANTS                                    | 1.4153244 | 0.066176474 | 0.2076811  | 1 |
| WONG EMBRYONIC STEM CELL CORE                                                           | 1.4147296 | 0           | 0.20791125 | 1 |
| PID DNA PK PATHWAY                                                                      | 1.4145497 | 0.06950673  | 0.20755574 | 1 |
| DACOSTA UV RESPONSE VIA ERCC3 COMMON DN                                                 | 1.4144108 | 0           | 0.20716344 | 1 |
| BROWNE HCMV INFECTION 30MIN DN                                                          | 1.4138294 | 0.01875     | 0.20737779 | 1 |
| REACTOME SIGNALING BY NUCLEAR RECEPTORS                                                 | 1.4135284 | 0           | 0.20717359 | 1 |
| BAELDE DIABETIC NEPHROPATHY UP                                                          | 1.4125602 | 0.025       | 0.20797229 | 1 |
| KENNY CTNNB1 TARGETS UP                                                                 | 1.4124477 | 0.04187192  | 0.20751956 | 1 |
| REACTOME ER QUALITY CONTROL COMPARTMENT ERQC                                            | 1.4121948 | 0.052009456 | 0.20727703 | 1 |
| KEGG SPLICEOSOME                                                                        | 1.4112482 | 0.00619195  | 0.20811354 | 1 |
| MAYBURD RESPONSE TO L663536 UP                                                          | 1.4090205 | 0.049411766 | 0.21066718 | 1 |
| ZWANG DOWN BY 2ND EGF PULSE                                                             | 1.4082764 | 0.007407407 | 0.21118157 | 1 |
| REACTOME DISASSEMBLY OF THE DESTRUCTION COMPLEX AND RECRUITMENT OF AXIN TO THE MEMBRANE | 1.4062579 | 0.06382979  | 0.21359189 | 1 |
| SIMBULAN UV RESPONSE NORMAL DN                                                          | 1.4053004 | 0.065375306 | 0.21445394 | 1 |

|                                                                 |           |             |            |   |
|-----------------------------------------------------------------|-----------|-------------|------------|---|
| REACTOME_RNA_POLYMERASE_II_TRANSCRIBES_SNRNA_GENES              | 1.4019783 | 0.017391304 | 0.21872343 | 1 |
| LAU_APOPTOSIS_CDKN2A_UP                                         | 1.4009312 | 0.032432433 | 0.21952456 | 1 |
| MOOTHA_GLUONEOGENESIS                                           | 1.3988253 | 0.08607595  | 0.22203135 | 1 |
| KIM_LIVER_CANCER_POOR_SURVIVAL_DN                               | 1.397823  | 0.047169812 | 0.22300732 | 1 |
| KEGG_MELANOGENESIS                                              | 1.3977323 | 0.01510574  | 0.22251855 | 1 |
| BIOCARTA_PDGF_PATHWAY                                           | 1.3948914 | 0.06407323  | 0.22633305 | 1 |
| NICK_RESPONSE_TO_PROC_TREATMENT_DN                              | 1.391878  | 0.055045873 | 0.23040329 | 1 |
| WANG_RESPONSE_TO_GSK3_INHIBITOR_SB216763_DN                     | 1.3895698 | 0           | 0.23352943 | 1 |
| REACTOME_BASE_EXCISION_REPAIR                                   | 1.3893163 | 0.040572792 | 0.23326649 | 1 |
| YIH_RESPONSE_TO_ARSENITE_C1                                     | 1.3889551 | 0.08604651  | 0.23317336 | 1 |
| PID_KIT_PATHWAY                                                 | 1.3885494 | 0.049586777 | 0.2331761  | 1 |
| RICKMAN_TUMOR_DIFFERENTIATED_WELL_VS_POORLY_UP                  | 1.3885194 | 0           | 0.23257095 | 1 |
| BIOCARTA_TCR_PATHWAY                                            | 1.3884908 | 0.05854801  | 0.23192717 | 1 |
| REACTOME_SUMOYLATION_OF_DNA_DAMAGE_RESPONSE_AND_REPAIR_PROTEINS | 1.387775  | 0.04249292  | 0.23238707 | 1 |
| VANTVEER_BREAST_CANCER_POOR_PROGNOSIS                           | 1.3877238 | 0.034391534 | 0.23180902 | 1 |
| BIOCARTA_CCR5_PATHWAY                                           | 1.386472  | 0.103837475 | 0.23310743 | 1 |
| REACTOME_S_PHASE                                                | 1.3846642 | 0.010309278 | 0.23510893 | 1 |
| BIOCARTA_ECM_PATHWAY                                            | 1.3840556 | 0.098280095 | 0.23537073 | 1 |
| KAMIKUBO_MYELOID_MN1_NETWORK                                    | 1.3831667 | 0.087804876 | 0.23608328 | 1 |

|                                                                                                               |           |             |            |   |
|---------------------------------------------------------------------------------------------------------------|-----------|-------------|------------|---|
| KYNG_NORMAL_AGING_UP                                                                                          | 1.3822101 | 0.09803922  | 0.23713116 | 1 |
| KAUFFMANN_DNA_REPLICATION_GENES                                                                               | 1.3811927 | 0.010067114 | 0.23809291 | 1 |
| BIOCARTA_SPPA_PATHWAY                                                                                         | 1.37905   | 0.0864745   | 0.24089652 | 1 |
| DACOSTA_UV_RESPONSE_VIA_ERCC3_TTD_DN                                                                          | 1.3784735 | 0.029239766 | 0.24117665 | 1 |
| REACTOME_TRANSCRIPTION_OF_E2F_TARGETS_UNDER_NEGATIVE_CONTROL_BY_P107_RBL1_AND_P130_RBL2_IN_COMPLEX_WITH_HDAC1 | 1.3778335 | 0.089411765 | 0.2416344  | 1 |
| AGUIRRE_PANCREATIC_CANCER_COPY_NUMBER_DN                                                                      | 1.3777686 | 0.004291846 | 0.24109215 | 1 |
| BIOCARTA_PPARA_PATHWAY                                                                                        | 1.3775231 | 0.035230353 | 0.24079657 | 1 |
| KEGG_ERBB_SIGNALING_PATHWAY                                                                                   | 1.3766342 | 0.031518623 | 0.24152501 | 1 |
| PID_NETRIN_PATHWAY                                                                                            | 1.3764923 | 0.052369077 | 0.24106778 | 1 |
| PROVENZANI_METASTASIS_UP                                                                                      | 1.374452  | 0.007843138 | 0.24371994 | 1 |
| BIOCARTA_PYK2_PATHWAY                                                                                         | 1.374447  | 0.06422018  | 0.2430634  | 1 |
| REACTOME_CELLULAR_RESPONSES_TO_STRESS                                                                         | 1.3739411 | 0           | 0.24317424 | 1 |
| KYNG_WERNER_SYNDROM_UP                                                                                        | 1.3738102 | 0.10933941  | 0.24274366 | 1 |
| VERHAAK_GLIOMASTOMA_PRONEURAL                                                                                 | 1.3719566 | 0.01010101  | 0.24496758 | 1 |
| REACTOME_TRANSCRIPTIONAL_REGULATION_BY_TP53                                                                   | 1.3710549 | 0           | 0.24576965 | 1 |
| WU_HBX_TARGETS_3_UP                                                                                           | 1.3709662 | 0.10185185  | 0.24527662 | 1 |
| REACTOME_REGULATION_OF_KIT_SIGNALING                                                                          | 1.3681691 | 0.10909091  | 0.24911894 | 1 |
| REACTOME_PD_1_SIGNALING                                                                                       | 1.3675845 | 0.10067114  | 0.2494455  | 1 |
| CEBALLOS_TARGETS_OF_TP53_AND_MYC_UP                                                                           | 1.3675374 | 0.094339624 | 0.24886025 | 1 |

|                                                                   |            |                  |                  |                   |
|-------------------------------------------------------------------|------------|------------------|------------------|-------------------|
| PURBEY_TARGETS_OF_CTBP1_AND_SATB1_UP                              | 1.3671309  | 0.039660055      | 0.24894658       | 1                 |
| PID_HDAC_CLASSII_PATHWAY                                          | 1.3661007  | 0.057971016      | 0.24990797       | 1                 |
| REACTOME_RNA_POLYMERASE_II_PRE_TRANSCRIPTION_EVENTS               | 1.365983   | 0.04191617       | 0.24942668       | 1                 |
| <i>p53</i> <sup>-/-</sup> <i>VAV1</i> -Tg Lym vs WT T splenocytes | <b>NES</b> | <b>NOM p-val</b> | <b>FDR q-val</b> | <b>FWER p-val</b> |
| ROSTY_CERVICAL_CANCER_PROLIFERATION_CLUSTER                       | 2.6744897  | 0                | 0                | 0                 |
| FLORIO_NEOCORTEX_BASAL_RADIAL_GLIA_DN                             | 2.6566577  | 0                | 0                | 0                 |
| SOTIRIOU_BREAST_CANCER_GRADE_1_VS_3_UP                            | 2.6321936  | 0                | 0                | 0                 |
| DUTERTRE ESTRADIOL_RESPONSE_24HR_UP                               | 2.5826893  | 0                | 0                | 0                 |
| KOBAYASHI_EGFR_SIGNALING_24HR_DN                                  | 2.5650227  | 0                | 0                | 0                 |
| CROONQUIST_IL6_DEPRIVATION_DN                                     | 2.5500708  | 0                | 0                | 0                 |
| ZHOU_CELL_CYCLE_GENES_IN_IR_RESPONSE_24HR                         | 2.5440145  | 0                | 0                | 0                 |
| GRAHAM_CML_DIVIDING_VS_NORMAL_QUIESCENT_UP                        | 2.5255225  | 0                | 0                | 0                 |
| KANG_DOXORUBICIN_RESISTANCE_UP                                    | 2.5253317  | 0                | 0                | 0                 |
| KONG_E2F3_TARGETS                                                 | 2.52217    | 0                | 0                | 0                 |
| BURTON_ADIPOGENESIS_3                                             | 2.52092    | 0                | 0                | 0                 |
| WINNEPENNINCKX_MELANOMA_METASTASIS_UP                             | 2.5142796  | 0                | 0                | 0                 |
| WHITEFORD_PEDIATRIC_CANCER_MARKERS                                | 2.5127528  | 0                | 0                | 0                 |
| GRAHAM_NORMAL_QUIESCENT_VS_NORMAL_DIVIDING_DN                     | 2.5038695  | 0                | 0                | 0                 |
| HOFFMANN_LARGE_TO_SMALL_PRE_BII_LYMPHOCYTE_UP                     | 2.4811053  | 0                | 0                | 0                 |
| ISHIDA_E2F_TARGETS                                                | 2.4793837  | 0                | 0                | 0                 |

|                                               |           |   |   |   |
|-----------------------------------------------|-----------|---|---|---|
| LEE_EARLY_T_LYMPHOCYTE_UP                     | 2.4585104 | 0 | 0 | 0 |
| MORI_IMMATURE_B_LYMPHOCYTE_DN                 | 2.4569979 | 0 | 0 | 0 |
| ZHOU_CELL_CYCLE_GENES_IN_IR_RESPONSE_6HR      | 2.4499333 | 0 | 0 | 0 |
| CROONQUIST_NRAS_SIGNALING_DN                  | 2.4451854 | 0 | 0 | 0 |
| WONG_EMBRYONIC_STEM_CELL_CORE                 | 2.4449446 | 0 | 0 | 0 |
| RUIZ_TNC_TARGETS_DN                           | 2.4445546 | 0 | 0 | 0 |
| ODONNELL_TFRC_TARGETS_DN                      | 2.4390328 | 0 | 0 | 0 |
| RHODES_UNDIFFERENTIATED_CANCER                | 2.4366643 | 0 | 0 | 0 |
| MISSIAGLIA_REGULATED_BY_METHYLATION_DN        | 2.4317544 | 0 | 0 | 0 |
| ZHAN_MULTIPLE_MYELOMA_PR_UP                   | 2.4252977 | 0 | 0 | 0 |
| GAVIN_FOXP3_TARGETS_CLUSTER_P6                | 2.403247  | 0 | 0 | 0 |
| MORI_LARGE_PRE_BII_LYMPHOCYTE_UP              | 2.4003036 | 0 | 0 | 0 |
| CHIANG_LIVER_CANCER_SUBCLASS_PROLIFERATION_UP | 2.3944933 | 0 | 0 | 0 |
| SHEDDEN_LUNG_CANCER_POOR_SURVIVAL_A6          | 2.3875186 | 0 | 0 | 0 |
| WHITFIELD_CELL_CYCLE_LITERATURE               | 2.3838873 | 0 | 0 | 0 |
| SARRIO_EPITHELIAL_MESENCHYMAL_TRANSITION_UP   | 2.3785024 | 0 | 0 | 0 |
| NAKAYAMA_SOFT_TISSUE_TUMORS_PCA2_UP           | 2.3715634 | 0 | 0 | 0 |
| PUJANA_BRCA_CENTERED_NETWORK                  | 2.3687584 | 0 | 0 | 0 |
| MANALO_HYPOXIA_DN                             | 2.3649817 | 0 | 0 | 0 |
| KAUFFMANN_MELANOMA_RELAPSE_UP                 | 2.3636096 | 0 | 0 | 0 |
| REACTOME_DNA_REPLICATION                      | 2.3594742 | 0 | 0 | 0 |

|                                               |           |   |   |   |
|-----------------------------------------------|-----------|---|---|---|
| REACTOME_CELL_CYCLE_CHECKPOINTS               | 2.3540342 | 0 | 0 | 0 |
| MOLENAAR_TARGETS_OF_CCND1_AND_CDK4_DN         | 2.3510475 | 0 | 0 | 0 |
| FRASOR_RESPONSE_TO_SERM_OR_FULVESTRANT_DN     | 2.348594  | 0 | 0 | 0 |
| REACTOME_MITOCHONDRIAL_TRANSLATION            | 2.34375   | 0 | 0 | 0 |
| MARKEY_RB1_ACUTE_LOF_UP                       | 2.3429909 | 0 | 0 | 0 |
| LE_EGR2_TARGETS_UP                            | 2.3379867 | 0 | 0 | 0 |
| MORI_PRE_BI_LYMPHOCYTE_UP                     | 2.3336105 | 0 | 0 | 0 |
| BENPORATH_PROLIFERATION                       | 2.3314748 | 0 | 0 | 0 |
| PUJANA_XPRSS_INT_NETWORK                      | 2.3296735 | 0 | 0 | 0 |
| REACTOME_DNA_STRAND_ELONGATION                | 2.3292868 | 0 | 0 | 0 |
| VECCHI_GASTRIC_CANCER_EARLY_UP                | 2.3265474 | 0 | 0 | 0 |
| BLUM_RESPONSE_TO_SALIRASIB_DN                 | 2.3238804 | 0 | 0 | 0 |
| FERREIRA_EWINGS_SARCOMA_UNSTABLE_VS_STABLE_UP | 2.3194742 | 0 | 0 | 0 |
| TANG_SENESCENCE_TP53_TARGETS_DN               | 2.3175657 | 0 | 0 | 0 |
| REACTOME_DNA_REPLICATION_PRE_INITIATION       | 2.3158824 | 0 | 0 | 0 |
| REICHERT_MITOSIS_LIN9_TARGETS                 | 2.314824  | 0 | 0 | 0 |
| BURTON_ADIPOGENESIS_PEAK_AT_24HR              | 2.3102262 | 0 | 0 | 0 |
| FUJII_YBX1_TARGETS_DN                         | 2.3064797 | 0 | 0 | 0 |
| REN_BOUND_BY_E2F                              | 2.299302  | 0 | 0 | 0 |
| ODONNELL_TARGETS_OF_MYC_AND_TFRC_DN           | 2.2962534 | 0 | 0 | 0 |
| SONG_TARGETS_OF_IE86_CMV_PROTEIN              | 2.2886176 | 0 | 0 | 0 |

|                                                           |           |   |   |   |
|-----------------------------------------------------------|-----------|---|---|---|
| WU_APOPTOSIS_BY_CDKN1A_VIA_TP53                           | 2.287919  | 0 | 0 | 0 |
| REACTOME_MITOTIC_SPINDLE_CHECKPOINT                       | 2.2847168 | 0 | 0 | 0 |
| REACTOME_G2_M_CHECKPOINTS                                 | 2.282097  | 0 | 0 | 0 |
| TARTE_PLASMA_CELL_VS_PLASMABLAST_DN                       | 2.2727005 | 0 | 0 | 0 |
| CHICAS_RB1_TARGETS_GROWING                                | 2.2657628 | 0 | 0 | 0 |
| MUELLER_PLURINET                                          | 2.261173  | 0 | 0 | 0 |
| LI_WILMS_TUMOR_VS_FETAL_KIDNEY_1_DN                       | 2.2583716 | 0 | 0 | 0 |
| LINDGREN_BLADDER_CANCER_CLUSTER_3_UP                      | 2.2565873 | 0 | 0 | 0 |
| CHEMNITZ_RESPONSE_TO_PROSTAGLANDIN_E2_UP                  | 2.254501  | 0 | 0 | 0 |
| REACTOME_MITOTIC_G1_G1_S_PHASES                           | 2.2515328 | 0 | 0 | 0 |
| SHEPARD_BMYB_TARGETS                                      | 2.2491589 | 0 | 0 | 0 |
| VERNELL_RETINOBLASTOMA_PATHWAY_UP                         | 2.2442465 | 0 | 0 | 0 |
| LY_AGING_OLD_DN                                           | 2.243453  | 0 | 0 | 0 |
| FURUKAWA_DUSP6_TARGETS_PCI35_DN                           | 2.2404664 | 0 | 0 | 0 |
| BASAKI_YBX1_TARGETS_UP                                    | 2.2383056 | 0 | 0 | 0 |
| MOOHA_VOXPHOS                                             | 2.2380688 | 0 | 0 | 0 |
| REACTOME_MITOTIC_METAPHASE_AND_ANAPHASE                   | 2.2354906 | 0 | 0 | 0 |
| REACTOME_SWITCHING_OF_ORIGINS_TO_A_POST_REPLICATIVE_STATE | 2.2324812 | 0 | 0 | 0 |
| YU_MYC_TARGETS_UP                                         | 2.231363  | 0 | 0 | 0 |
| HORIUCHI_WTAP_TARGETS_DN                                  | 2.222936  | 0 | 0 | 0 |



|                                                                  |           |   |   |   |
|------------------------------------------------------------------|-----------|---|---|---|
| EGUCHI_CELL_CYCLE_RB1_TARGETS                                    | 2.221455  | 0 | 0 | 0 |
| REACTOME_RESOLUTION_OF_SISTER_CHROMATID_COHESION                 | 2.2213376 | 0 | 0 | 0 |
| WONG_MITOCHONDRIA_GENE_MODULE                                    | 2.2187243 | 0 | 0 | 0 |
| PID_ATR_PATHWAY                                                  | 2.2160182 | 0 | 0 | 0 |
| REACTOME_ASSEMBLY_OF_THE_PRE_REPLICATIVE_COMPLEX                 | 2.2155342 | 0 | 0 | 0 |
| REACTOME_CHROMOSOME_MAINTENANCE                                  | 2.215452  | 0 | 0 | 0 |
| REACTOME_ORC1_REMOVAL_FROM_CHROMATIN                             | 2.2138958 | 0 | 0 | 0 |
| REACTOME_S_PHASE                                                 | 2.211845  | 0 | 0 | 0 |
| NAKAMURA_CANCER_MICROENVIRONMENT_DN                              | 2.21011   | 0 | 0 | 0 |
| REACTOME_REGULATION_OF_MITOTIC_CELL_CYCLE                        | 2.2094111 | 0 | 0 | 0 |
| REACTOME_ACTIVATION_OF_ATR_IN_RESPONSE_TO_REPLICATI<br>ON_STRESS | 2.208499  | 0 | 0 | 0 |
| KEGG_DNA_REPLICATION                                             | 2.2056086 | 0 | 0 | 0 |
| FOURNIER_ACINAR_DEVELOPMENT_LATE_2                               | 2.2032926 | 0 | 0 | 0 |
| GARGALOVIC_RESPONSE_TO_OXIDIZED_PHOSPHOLIPIDS_TURQ<br>UOISE_DN   | 2.2015016 | 0 | 0 | 0 |
| FISCHER_G2_M_CELL_CYCLE                                          | 2.2003596 | 0 | 0 | 0 |
| REACTOME_CELL_CYCLE_MITOTIC                                      | 2.194111  | 0 | 0 | 0 |
| KEGG_OXIDATIVE_PHOSPHORYLATION                                   | 2.1899414 | 0 | 0 | 0 |
| KAMMINGA_EZH2_TARGETS                                            | 2.1876495 | 0 | 0 | 0 |
| BURTON_ADIPOGENESIS_PEAK_AT_16HR                                 | 2.1809392 | 0 | 0 | 0 |

|                                                                                                                           |           |   |   |   |
|---------------------------------------------------------------------------------------------------------------------------|-----------|---|---|---|
| REACTOME_HDR_THROUGH_HOMOLOGOUS_RECOMBINATION_HRR                                                                         | 2.1744378 | 0 | 0 | 0 |
| PID_PLK1_PATHWAY                                                                                                          | 2.1738136 | 0 | 0 | 0 |
| REACTOME_RESPIRATORY_ELECTRON_TRANSPORT_ATP_SYNTHESIS_BY_CHEMIOSMOTIC_COUPLING_AND_HEAT_PRODUCTION_BY_UNCOUPLING_PROTEINS | 2.170476  | 0 | 0 | 0 |
| ZHENG_GLIOMASTOMA_PLASTICITY_UP                                                                                           | 2.170293  | 0 | 0 | 0 |
| REACTOME_HOMOLOGOUS_DNA_PAIRING_AND_STRAND_EXCHANGE                                                                       | 2.168943  | 0 | 0 | 0 |
| FINETTI_BREAST_CANCER_KINOME_RED                                                                                          | 2.1672335 | 0 | 0 | 0 |
| REACTOME_RHO_GTPASES_ACTIVATE_FORMINS                                                                                     | 2.1655781 | 0 | 0 | 0 |
| REACTOME_ACTIVATION_OF_APC_C_AND_APC_C:CDC20_MEDIATED_DEGRADATION_OF_MITOTIC_PROTEINS                                     | 2.163194  | 0 | 0 | 0 |
| BOYALT_LIVER_CANCER_SUBCLASS_G3_UP                                                                                        | 2.1591141 | 0 | 0 | 0 |
| GOLDRATH_ANTIGEN_RESPONSE                                                                                                 | 2.1588256 | 0 | 0 | 0 |
| PUJANA_BREAST_CANCER_WITH_BRCA1_MUTATED_UP                                                                                | 2.1585572 | 0 | 0 | 0 |
| REACTOME_VIF_MEDIATED_DEGRADATION_OF_APOBEC3G                                                                             | 2.149222  | 0 | 0 | 0 |
| SCIAN_CELL_CYCLE_TARGETS_OF_TP53_AND_TP73_DN                                                                              | 2.146048  | 0 | 0 | 0 |
| DANG_MYC_TARGETS_UP                                                                                                       | 2.144505  | 0 | 0 | 0 |
| SCHUHMACHER_MYC_TARGETS_UP                                                                                                | 2.1438723 | 0 | 0 | 0 |
| REACTOME_ACTIVATION_OF_THE_PRE_REPLICATIVE_COMPLEX                                                                        | 2.14348   | 0 | 0 | 0 |

|                                                                       |           |   |   |   |
|-----------------------------------------------------------------------|-----------|---|---|---|
| REACTOME_RESPIRATORY_ELECTRON_TRANSPORT                               | 2.1383324 | 0 | 0 | 0 |
| REACTOME_THE_CITRIC_ACID_TCA_CYCLE_AND_RESPIRATORY_ELECTRON_TRANSPORT | 2.1379685 | 0 | 0 | 0 |
| REACTOME_LAGGING_STRAND_SYNTHESIS                                     | 2.1370711 | 0 | 0 | 0 |
| PUJANA_BRCA2_PCC_NETWORK                                              | 2.136102  | 0 | 0 | 0 |
| PID_FANCONI_PATHWAY                                                   | 2.136061  | 0 | 0 | 0 |
| REACTOME_CROSS_PRESENTATION_OF_SOLUBLE_EXOGENOUS_ANTIGENS_ENDOSOMES   | 2.1358488 | 0 | 0 | 0 |
| YAO_TEMPORAL_RESPONSE_TO_PROGESTERONE_CLUSTER_14                      | 2.1335976 | 0 | 0 | 0 |
| AFFAR_YY1_TARGETS_DN                                                  | 2.133369  | 0 | 0 | 0 |
| YAO_TEMPORAL_RESPONSE_TO_PROGESTERONE_CLUSTER_13                      | 2.132426  | 0 | 0 | 0 |
| SMID_BREAST_CANCER_LUMINAL_A_DN                                       | 2.1247997 | 0 | 0 | 0 |
| REACTOME_COMPLEX_I_BIOGENESIS                                         | 2.1235638 | 0 | 0 | 0 |
| RHEIN_ALL_GLUCOCORTICOID_THERAPY_DN                                   | 2.12279   | 0 | 0 | 0 |
| REACTOME_MITOTIC_PROMETAPHASE                                         | 2.1215334 | 0 | 0 | 0 |
| PAL_PRMT5_TARGETS_UP                                                  | 2.1201618 | 0 | 0 | 0 |
| MOOHA_HUMAN_MITODB_6_2002                                             | 2.1170757 | 0 | 0 | 0 |
| GREENBAUM_E2A_TARGETS_UP                                              | 2.1118834 | 0 | 0 | 0 |
| KEGG_PROTEASOME                                                       | 2.1113586 | 0 | 0 | 0 |
| MITSIADES_RESPONSE_TO_APLIDIN_DN                                      | 2.1096537 | 0 | 0 | 0 |
| REACTOME_CDK_MEDIATED_PHOSPHORYLATION_AND_REMOVA                      | 2.1086025 | 0 | 0 | 0 |

|                                                                                                                           |           |   |   |   |
|---------------------------------------------------------------------------------------------------------------------------|-----------|---|---|---|
| L_OF_CDC6                                                                                                                 |           |   |   |   |
| FARMER_BREAST_CANCER_CLUSTER_2                                                                                            | 2.1041853 | 0 | 0 | 0 |
| LY_AGING_MIDDLE_DN                                                                                                        | 2.1035728 | 0 | 0 | 0 |
| REACTOME_SCF_SKP2_MEDIATED_DEGRADATION_OF_P27_P21                                                                         | 2.1031206 | 0 | 0 | 0 |
| REACTOME_DEGRADATION_OF_GLI1_BY_THE_PROTEASOME                                                                            | 2.0989466 | 0 | 0 | 0 |
| REACTOME_APC_C:CDH1_MEDIATED_DEGRADATION_OF_CDC20<br>_AND_OTHER_APC_C:CDH1_TARGETED_PROTEINS_IN_LATE_MIT<br>OSIS_EARLY_G1 | 2.096979  | 0 | 0 | 0 |
| REACTOME_M_PHASE                                                                                                          | 2.0953948 | 0 | 0 | 0 |
| REACTOME_NEGATIVE_REGULATION_OF_NOTCH4_SIGNALING                                                                          | 2.0942156 | 0 | 0 | 0 |
| CHIANG_LIVER_CANCER_SUBCLASS_UNANNOTATED_DN                                                                               | 2.0920138 | 0 | 0 | 0 |
| REACTOME_FBXL7_DOWN_REGULATES_AURKA_DURING_MITOT<br>IC_ENTRY_AND_IN_EARLY_MITOSIS                                         | 2.0888557 | 0 | 0 | 0 |
| REACTOME_EXTENSION_OF_TELOMERES                                                                                           | 2.0841465 | 0 | 0 | 0 |
| YAO_TEMPORAL_RESPONSE_TO_PROGESTERONE_CLUSTER_17                                                                          | 2.0827553 | 0 | 0 | 0 |
| WANG_RESPONSE_TO_GSK3_INHIBITOR_SB216763_DN                                                                               | 2.0827463 | 0 | 0 | 0 |
| PID_AURORA_B_PATHWAY                                                                                                      | 2.080214  | 0 | 0 | 0 |
| REACTOME_HEDGEHOG_LIGAND_BIOGENESIS                                                                                       | 2.0790641 | 0 | 0 | 0 |
| VILLANUEVA_LIVER_CANCER_KRT19_UP                                                                                          | 2.0789685 | 0 | 0 | 0 |
| CROONQUIST_NRAS_VS_STROMAL_STIMULATION_DN                                                                                 | 2.0784411 | 0 | 0 | 0 |
| RHODES_CANCER_META_SIGNATURE                                                                                              | 2.0755713 | 0 | 0 | 0 |

|                                                                                                |           |   |   |   |
|------------------------------------------------------------------------------------------------|-----------|---|---|---|
| CONCANNON_APOPTOSIS_BY_EPOXOMICIN_DN                                                           | 2.0743277 | 0 | 0 | 0 |
| REACTOME_AUF1_HNRNP_D0_BINDS_AND_DESTABILIZES_MRN<br>A                                         | 2.0741105 | 0 | 0 | 0 |
| REACTOME_HOMOLOGY_DIRECTED_REPAIR                                                              | 2.0733159 | 0 | 0 | 0 |
| REACTOME_REGULATION_OF_APOPTOSIS                                                               | 2.069861  | 0 | 0 | 0 |
| KEGG_PARKINSONS_DISEASE                                                                        | 2.0690665 | 0 | 0 | 0 |
| REACTOME_TELOMERE_MAINTENANCE                                                                  | 2.0683303 | 0 | 0 | 0 |
| PID_BARD1_PATHWAY                                                                              | 2.0678487 | 0 | 0 | 0 |
| SHIPP_DLCL_VS_FOLLICULAR_LYMPHOMA_UP                                                           | 2.067816  | 0 | 0 | 0 |
| ZHANG_RESPONSE_TO_CANTHARIDIN_DN                                                               | 2.0666094 | 0 | 0 | 0 |
| LI_WILMS_TUMOR_ANAPLASTIC_UP                                                                   | 2.066475  | 0 | 0 | 0 |
| NADERI_BREAST_CANCER_PROGNOSIS_UP                                                              | 2.065104  | 0 | 0 | 0 |
| KEGG_CELL_CYCLE                                                                                | 2.0625377 | 0 | 0 | 0 |
| MOOHA_MITOCHONDRIA                                                                             | 2.0619895 | 0 | 0 | 0 |
| REACTOME_TRNA_PROCESSING                                                                       | 2.0594084 | 0 | 0 | 0 |
| NAKAMURA_TUMOR_ZONE_PERIPHERAL_VS_CENTRAL_UP                                                   | 2.0560803 | 0 | 0 | 0 |
| CHICAS_RB1_TARGETS_LOW_SERUM                                                                   | 2.0524695 | 0 | 0 | 0 |
| KEGG_PYRIMIDINE_METABOLISM                                                                     | 2.052319  | 0 | 0 | 0 |
| KAUFFMANN_DNA_REPLICATION_GENES                                                                | 2.0520437 | 0 | 0 | 0 |
| REACTOME_RESOLUTION_OF_D_LOOP_STRUCTURES_THROUGH<br>_SYNTHESIS_DEPENDENT_STRAND_ANNEALING_SDSA | 2.0504234 | 0 | 0 | 0 |

|                                                                              |           |   |   |   |
|------------------------------------------------------------------------------|-----------|---|---|---|
| MOREAUX_B_LYMPHOCYTE_MATURATION_BY_TACI_DN                                   | 2.0498405 | 0 | 0 | 0 |
| REACTOME_TELOMERE_C_STRAND_LAGGING_STRAND_SYNTHESIS                          | 2.048853  | 0 | 0 | 0 |
| REACTOME_HDR_THROUGH_SINGLE_STRAND_ANNEALING_SSA                             | 2.0488265 | 0 | 0 | 0 |
| FERRANDO_T_ALL_WITH_MLL_ENL_FUSION_DN                                        | 2.0480037 | 0 | 0 | 0 |
| HESS_TARGETS_OF_HOXA9_AND_MEIS1_UP                                           | 2.0479505 | 0 | 0 | 0 |
| REACTOME_METABOLISM_OF_POLYAMINES                                            | 2.044844  | 0 | 0 | 0 |
| CUI_TCF21_TARGETS_2_UP                                                       | 2.0442848 | 0 | 0 | 0 |
| FOURNIER_ACINAR_DEVELOPMENT_LATE_DN                                          | 2.039204  | 0 | 0 | 0 |
| REACTOME_HOST_INTERACTIONS_OF_HIV_FACTORS                                    | 2.0388427 | 0 | 0 | 0 |
| REACTOME_REGULATION_OF_MRNA_STABILITY_BY_PROTEINS_THAT_BIND_AU_RICH_ELEMENTS | 2.0377343 | 0 | 0 | 0 |
| REACTOME_CYCLIN_A_B1_B2_ASSOCIATED_EVENTS_DURING_G2_M_TRANSITION             | 2.0327559 | 0 | 0 | 0 |
| GRADE_COLON_AND_RECTAL_CANCER_UP                                             | 2.032194  | 0 | 0 | 0 |
| REACTOME_ABC_TRANSPORTER_DISORDERS                                           | 2.0314193 | 0 | 0 | 0 |
| SHEPARD_BMYB_MORPHOLINO_DN                                                   | 2.0279143 | 0 | 0 | 0 |
| REACTOME_RECOGNITION_OF_DNA_DAMAGE_BY_PCNA_CONTAINING_REPLICATION_COMPLEX    | 2.0265033 | 0 | 0 | 0 |
| REACTOME_DEFECTIVE_CFTR_CAUSES_CYSTIC_FIBROSIS                               | 2.0257123 | 0 | 0 | 0 |
| REACTOME_RESOLUTION_OF_D_LOOP_STRUCTURES                                     | 2.0229213 | 0 | 0 | 0 |

|                                                                    |           |   |   |   |
|--------------------------------------------------------------------|-----------|---|---|---|
| BOYALT_LIVER_CANCER_SUBCLASS_G23_UP                                | 2.0227163 | 0 | 0 | 0 |
| REACTOME_CYTOSOLIC_TRNA_AMINOACYLATION                             | 2.0225718 | 0 | 0 | 0 |
| REACTOME_MITOCHONDRIAL_PROTEIN_IMPORT                              | 2.0196936 | 0 | 0 | 0 |
| REACTOME_DNA_DOUBLE_STRAND_BREAK_REPAIR                            | 2.0174983 | 0 | 0 | 0 |
| REACTOME_METABOLISM_OF_NON_CODING_RNA                              | 2.0172477 | 0 | 0 | 0 |
| VANTVEER_BREAST_CANCER_METASTASIS_DN                               | 2.0157063 | 0 | 0 | 0 |
| PETROVA_ENDOTHELIUM_LYMPHATIC_VS_BLOOD_UP                          | 2.0153422 | 0 | 0 | 0 |
| REACTOME_DEGRADATION_OF_DVL                                        | 2.0147104 | 0 | 0 | 0 |
| RAHMAN_TP53_TARGETS_PHOSPHORYLATED                                 | 2.0144978 | 0 | 0 | 0 |
| WHITFIELD_CELL_CYCLE_G2                                            | 2.0129697 | 0 | 0 | 0 |
| REACTOME_TRNA_PROCESSING_IN_THE_NUCLEUS                            | 2.0120451 | 0 | 0 | 0 |
| REACTOME_THE_ROLE_OF_GTSE1_IN_G2_M_PROGRESSION_AFTER_G2_CHECKPOINT | 2.011895  | 0 | 0 | 0 |
| LY_AGING_PREMATURE_DN                                              | 2.0111415 | 0 | 0 | 0 |
| ZHANG_BREAST_CANCER_PROGENITORS_UP                                 | 2.010389  | 0 | 0 | 0 |
| MORI_MATURE_B_LYMPHOCYTE_DN                                        | 2.0079799 | 0 | 0 | 0 |
| XU_HGF_SIGNALING_NOT_VIA_AKT1_48HR_DN                              | 2.0062904 | 0 | 0 | 0 |
| REACTOME_CYCLIN_A:CDK2_ASSOCIATED_EVENTS_AT_S_PHASE_ENTRY          | 2.0061798 | 0 | 0 | 0 |
| REACTOME_MITOTIC_G2_G2_M_PHASES                                    | 2.0029516 | 0 | 0 | 0 |
| REACTOME_TRANSLATION                                               | 1.9989636 | 0 | 0 | 0 |

|                                                                                       |           |   |          |       |
|---------------------------------------------------------------------------------------|-----------|---|----------|-------|
| SHEPARD_CRUSH_AND_BURN_MUTANT_DN                                                      | 1.9927734 | 0 | 3.50E-06 | 0.001 |
| REACTOME_PCNA_DEPENDENT_LONG_PATCH_BASE_EXCISION_REPAIR                               | 1.992499  | 0 | 3.48E-06 | 0.001 |
| GARCIA_TARGETS_OF_FLI1_AND_DAX1_DN                                                    | 1.989329  | 0 | 3.46E-06 | 0.001 |
| OUELLET_OVARIAN_CANCER_INVASIVE_VS_LMP_UP                                             | 1.9888312 | 0 | 3.45E-06 | 0.001 |
| MORI_EMU_MYC_LYMPHOMA_BY_ONSET_TIME_UP                                                | 1.9886312 | 0 | 3.43E-06 | 0.001 |
| WAKASUGI_HAVE_ZNF143_BINDING_SITES                                                    | 1.9876219 | 0 | 3.41E-06 | 0.001 |
| REACTOME_STABILIZATION_OF_P53                                                         | 1.9841857 | 0 | 6.82E-06 | 0.002 |
| KAUFFMANN_DNA_REPAIR_GENES                                                            | 1.982272  | 0 | 1.02E-05 | 0.003 |
| REACTOME_RESOLUTION_OF_ABASIC_SITES_AP_SITES                                          | 1.9822711 | 0 | 1.02E-05 | 0.003 |
| PID_FOXM1_PATHWAY                                                                     | 1.9805388 | 0 | 1.01E-05 | 0.003 |
| REACTOME_G1_S_DNA_DAMAGE_CHECKPOINTS                                                  | 1.9795591 | 0 | 1.01E-05 | 0.003 |
| REACTOME_G2_M_DNA_DAMAGE_CHECKPOINT                                                   | 1.9790661 | 0 | 1.00E-05 | 0.003 |
| KEGG_HOMOLOGOUS_RECOMBINATION                                                         | 1.9754503 | 0 | 9.98E-06 | 0.003 |
| KEGG_MISMATCH_REPAIR                                                                  | 1.9724494 | 0 | 1.33E-05 | 0.004 |
| MALONEY_RESPONSE_TO_17AAG_DN                                                          | 1.9690928 | 0 | 1.65E-05 | 0.005 |
| REACTOME_RESOLUTION_OF_AP_SITES_VIA_THE_MULTIPLE_NUCLEOTIDE_PATCH_REPLACEMENT_PATHWAY | 1.968144  | 0 | 1.64E-05 | 0.005 |
| REACTOME_RUNX1_REGULATES_TRANSCRIPTION_OF_GENES_INVOLVED_IN_DIFFERENTIATION_OF_HSCS   | 1.9679836 | 0 | 1.64E-05 | 0.005 |
| STEIN_ESRRA_TARGETS_RESPONSIVE_TO_ESTROGEN_DN                                         | 1.9659294 | 0 | 1.63E-05 | 0.005 |



|                                                     |           |   |          |       |
|-----------------------------------------------------|-----------|---|----------|-------|
| REACTOME_DNA_DAMAGE_BYPASS                          | 1.9643656 | 0 | 1.62E-05 | 0.005 |
| REACTOME_E2F_MEDIATED_REGULATION_OF_DNA_REPLICATION | 1.9642984 | 0 | 1.61E-05 | 0.005 |
| DANG_REGULATED_BY_MYC_UP                            | 1.963527  | 0 | 1.93E-05 | 0.006 |
| REACTOME_ASYMMETRIC_LOCALIZATION_OF_PCP_PROTEINS    | 1.9633052 | 0 | 1.92E-05 | 0.006 |
| LEE_LIVER_CANCER_SURVIVAL_DN                        | 1.9628794 | 0 | 1.91E-05 | 0.006 |
| SU_TESTIS                                           | 1.9605289 | 0 | 1.90E-05 | 0.006 |
| ZAMORA_NOS2_TARGETS_UP                              | 1.9603077 | 0 | 1.89E-05 | 0.006 |
| REACTOME_PROCESSING_OF_DNA_DOUBLE_STRAND_BREAK_ENDS | 1.9598241 | 0 | 1.88E-05 | 0.006 |
| KEGG_HUNTINGTONS_DISEASE                            | 1.9581851 | 0 | 1.88E-05 | 0.006 |
| BHATI_G2M_ARREST_BY_2METHOXYESTRADIOL_UP            | 1.9559795 | 0 | 1.87E-05 | 0.006 |
| REACTOME_MEIOTIC_RECOMBINATION                      | 1.9545407 | 0 | 1.86E-05 | 0.006 |
| SCHLOSSER_MYC_TARGETS_REPRESSED_BY_SERUM            | 1.9540824 | 0 | 1.85E-05 | 0.006 |
| REACTOME_DNA_REPAIR                                 | 1.9519141 | 0 | 2.15E-05 | 0.007 |
| REACTOME_CRISTAE_FORMATION                          | 1.9514234 | 0 | 2.14E-05 | 0.007 |
| SENGUPTA_NASOPHARYNGEAL_CARCINOMA_UP                | 1.9508607 | 0 | 2.13E-05 | 0.007 |
| PEART_HDAC_PROLIFERATION_CLUSTER_DN                 | 1.9497911 | 0 | 2.13E-05 | 0.007 |
| REACTOME_ABC_FAMILY_PROTEINS_MEDIATED_TRANSPORT     | 1.948837  | 0 | 2.12E-05 | 0.007 |
| REACTOME_G1_S_SPECIFIC_TRANSCRIPTION                | 1.9463863 | 0 | 2.41E-05 | 0.008 |
| WEST_ADRENOCORTICAL_TUMOR_MARKERS_UP                | 1.9460038 | 0 | 2.40E-05 | 0.008 |

|                                                  |           |   |          |       |
|--------------------------------------------------|-----------|---|----------|-------|
| WANG_CISPLATIN_RESPONSE_AND_XPC_UP               | 1.9445832 | 0 | 2.39E-05 | 0.008 |
| REACTOME_BASE_EXCISION_REPAIR                    | 1.9441931 | 0 | 2.38E-05 | 0.008 |
| HU_GENOTOXIC_DAMAGE_4HR                          | 1.9432565 | 0 | 2.37E-05 | 0.008 |
| YAO_TEMPORAL_RESPONSE_TO_PROGESTERONE_CLUSTER_11 | 1.9420053 | 0 | 2.36E-05 | 0.008 |
| REACTOME_TRNA_AMINOACYLATION                     | 1.9416152 | 0 | 2.35E-05 | 0.008 |
| SCHLOSSER_MYC_TARGETS_AND_SERUM_RESPONSE_UP      | 1.940687  | 0 | 2.63E-05 | 0.009 |
| REACTOME_METABOLISM_OF_NUCLEOTIDES               | 1.9329923 | 0 | 3.20E-05 | 0.011 |
| GRAHAM_CML QUIESCENT VS NORMAL QUIESCENT_UP      | 1.9304248 | 0 | 4.06E-05 | 0.014 |
| REACTOME_NUCLEOSOME_ASSEMBLY                     | 1.9304224 | 0 | 4.04E-05 | 0.014 |
| REACTOME_HIV_INFECTION                           | 1.930257  | 0 | 4.03E-05 | 0.014 |
| EPPERT_PROGENITOR                                | 1.9297442 | 0 | 4.01E-05 | 0.014 |
| BIOCARTA_ATRBRCA_PATHWAY                         | 1.9262701 | 0 | 4.28E-05 | 0.015 |
| YAO_TEMPORAL_RESPONSE_TO_PROGESTERONE_CLUSTER_10 | 1.9256686 | 0 | 4.26E-05 | 0.015 |
| DUTERTRE ESTRADIOL_RESPONSE_6HR_UP               | 1.9233431 | 0 | 4.25E-05 | 0.015 |
| MOREAUX_MULTIPLE_MYELOMA_BY_TACI_DN              | 1.9212053 | 0 | 4.23E-05 | 0.015 |
| PUJANA_BREAST_CANCER_LIT_INT_NETWORK             | 1.9208108 | 0 | 4.21E-05 | 0.015 |
| SCHLOSSER_MYC_TARGETS_AND_SERUM_RESPONSE_DN      | 1.9177356 | 0 | 5.03E-05 | 0.018 |
| GAL_LEUKEMIC_STEM_CELL_DN                        | 1.9157475 | 0 | 5.85E-05 | 0.021 |
| TOYOTA_TARGETS_OF_MIR34B_AND_MIR34C              | 1.914847  | 0 | 5.83E-05 | 0.021 |
| WEST_ADRENOCORTICAL_TUMOR_UP                     | 1.914315  | 0 | 5.80E-05 | 0.021 |
| YU_BAP1_TARGETS                                  | 1.9132067 | 0 | 5.78E-05 | 0.021 |

|                                                       |           |   |          |       |
|-------------------------------------------------------|-----------|---|----------|-------|
| REACTOME_RRNA_MODIFICATION_IN_THE_NUCLEUS_AND_CYTOSOL | 1.9127208 | 0 | 5.76E-05 | 0.021 |
| SIMBULAN_PARP1_TARGETS_DN                             | 1.9117819 | 0 | 6.01E-05 | 0.022 |
| ALCALAY_AML_BY_NPM1_LOCALIZATION_DN                   | 1.9116814 | 0 | 5.99E-05 | 0.022 |
| RIZ_ERYTHROID_DIFFERENTIATION                         | 1.9111326 | 0 | 6.24E-05 | 0.023 |
| DELPUECH_FOXO3_TARGETS_DN                             | 1.9109129 | 0 | 6.21E-05 | 0.023 |
| BENPORATH_ES_1                                        | 1.9102188 | 0 | 6.46E-05 | 0.024 |
| SERVITJA_LIVER_HNF1A_TARGETS_UP                       | 1.9083782 | 0 | 6.97E-05 | 0.026 |
| ZHAN_MULTIPLE_MYELOMA_SUBGROUPS                       | 1.9052405 | 0 | 6.94E-05 | 0.026 |
| REACTOME_SUMOYLATION_OF_DNA_REPLICATION_PROTEINS      | 1.9031572 | 0 | 6.92E-05 | 0.026 |
| REACTOME_DISORDERS_OF_TRANSMEMBRANE_TRANSPORTERS      | 1.8961599 | 0 | 9.54E-05 | 0.035 |
| BHATTACHARYA_EMBRYONIC_STEM_CELL                      | 1.8948563 | 0 | 9.51E-05 | 0.035 |
| KEGG_PURINE_METABOLISM                                | 1.8935556 | 0 | 1.03E-04 | 0.038 |
| REACTOME_REGULATION_OF_RUNX3_EXPRESSION_AND_ACTIVITY  | 1.8927408 | 0 | 1.02E-04 | 0.038 |
| WELCSH_BRCA1_TARGETS_DN                               | 1.8906317 | 0 | 1.02E-04 | 0.038 |
| WHITFIELD_CELL_CYCLE_G2_M                             | 1.8899623 | 0 | 1.04E-04 | 0.039 |
| KEGG_AMINOACYL_TRNA_BIOSYNTHESIS                      | 1.8896333 | 0 | 1.04E-04 | 0.039 |
| REACTOME_TRANSLESION_SYNTHESIS_BY_POLH                | 1.8884012 | 0 | 1.06E-04 | 0.04  |
| REACTOME_REGULATION_OF_RAS_BY_GAPS                    | 1.8879648 | 0 | 1.13E-04 | 0.043 |
| JAEGER_METASTASIS_UP                                  | 1.8863615 | 0 | 1.13E-04 | 0.043 |

|                                                          |           |   |          |       |
|----------------------------------------------------------|-----------|---|----------|-------|
| FERRANDO_HOX11_NEIGHBORS                                 | 1.885387  | 0 | 1.18E-04 | 0.045 |
| REACTOME_INTERACTIONS_OF_REV_WITH_HOST_CELLULAR_PROTEINS | 1.8787117 | 0 | 1.30E-04 | 0.049 |
| REACTOME_G0_AND_EARLY_G1                                 | 1.8782036 | 0 | 1.29E-04 | 0.049 |
| WHITFIELD_CELL_CYCLE_G1_S                                | 1.8760438 | 0 | 1.44E-04 | 0.055 |
| PETROVA_PROX1_TARGETS_UP                                 | 1.8744011 | 0 | 1.51E-04 | 0.058 |
| LI_DCP2_BOUND_MRNA                                       | 1.8738283 | 0 | 1.56E-04 | 0.06  |
| REACTOME_DEGRADATION_OF_AXIN                             | 1.8737947 | 0 | 1.55E-04 | 0.06  |
| REACTOME_POLO_LIKE_KINASE_MEDIATED_EVENTS                | 1.8731534 | 0 | 1.55E-04 | 0.06  |
| REACTOME_REGULATION_OF_RUNX2_EXPRESSION_AND_ACTIVITY     | 1.8720307 | 0 | 1.57E-04 | 0.061 |
| RAMASWAMY_METASTASIS_UP                                  | 1.8700333 | 0 | 1.78E-04 | 0.069 |
| WINTER_HYPOXIA_UP                                        | 1.8670652 | 0 | 1.88E-04 | 0.073 |
| FISCHER_G1_S_CELL_CYCLE                                  | 1.8667562 | 0 | 1.87E-04 | 0.073 |
| ABRAMSON_INTERACT_WITH_AIRE                              | 1.8659915 | 0 | 1.91E-04 | 0.074 |
| REACTOME_REGULATION_OF_PTEN_STABILITY_AND_ACTIVITY       | 1.8607743 | 0 | 2.27E-04 | 0.087 |
| REACTOME_DECTIN_1_MEDIATED_NONCANONICAL_NF_KB_SIGNALING  | 1.8586942 | 0 | 2.39E-04 | 0.091 |
| BIDUS_METASTASIS_UP                                      | 1.8583413 | 0 | 2.40E-04 | 0.092 |
| REACTOME_TRANSPORT_OF_MATURE_TRANSCRIPT_TO_CYTOPLASM     | 1.8577825 | 0 | 2.44E-04 | 0.094 |

|                                                                      |           |             |          |       |
|----------------------------------------------------------------------|-----------|-------------|----------|-------|
| REACTOME_TRANSCRIPTIONAL_REGULATION_BY_SMALL_RNAS                    | 1.8577371 | 0           | 2.44E-04 | 0.094 |
| SCIBETTA_KDM5B_TARGETS_DN                                            | 1.8573059 | 0           | 2.50E-04 | 0.097 |
| KEGG_NUCLEOTIDE_EXCISION_REPAIR                                      | 1.8550637 | 0           | 2.54E-04 | 0.099 |
| MARKEY_RB1_CHRONIC_LOF_UP                                            | 1.8537003 | 0           | 2.55E-04 | 0.1   |
| SASAKI_ADULT_T_CELL_LEUKEMIA                                         | 1.8532574 | 0           | 2.57E-04 | 0.101 |
| REACTOME_HEDGEHOG_ON_STATE                                           | 1.8529412 | 0           | 2.56E-04 | 0.101 |
| REACTOME_NUCLEAR_PORE_COMPLEX_NPC_DISASSEMBLY                        | 1.851537  | 0           | 2.70E-04 | 0.107 |
| REACTOME_GAP_FILLING_DNA_REPAIR_SYNTHESIS_AND_LIGAT<br>ION_IN_GG_NER | 1.8508662 | 0           | 2.73E-04 | 0.109 |
| REACTOME_GLUCOSE_METABOLISM                                          | 1.848348  | 0           | 2.96E-04 | 0.118 |
| REACTOME_GLYCOLYSIS                                                  | 1.844183  | 0           | 3.28E-04 | 0.13  |
| IRITANI_MADI_TARGETS_DN                                              | 1.8410518 | 0           | 3.57E-04 | 0.143 |
| REACTOME_VIRAL_MESSENGER_RNA_SYNTHESIS                               | 1.8407444 | 0           | 3.58E-04 | 0.144 |
| LINDGREN_BLADDER_CANCER_CLUSTER_1_DN                                 | 1.8399115 | 0           | 3.59E-04 | 0.145 |
| REACTOME_REGULATION_OF_TP53_ACTIVITY_THROUGH_PHOSP<br>HORYLATION     | 1.8392131 | 0           | 3.63E-04 | 0.147 |
| CAIRO_PML_TARGETS_BOUND_BY_MYC_UP                                    | 1.8387479 | 0           | 3.61E-04 | 0.147 |
| STEIN_ESRRA_TARGETS_UP                                               | 1.8386195 | 0           | 3.60E-04 | 0.147 |
| REACTOME_INTERCONVERSION_OF_NUCLEOTIDE_DI_AND_TRIP<br>HOSPHATES      | 1.8371661 | 0.001269036 | 3.66E-04 | 0.15  |
| MOOHA_PGC                                                            | 1.8332326 | 0           | 3.97E-04 | 0.164 |

|                                                                                             |           |   |          |       |
|---------------------------------------------------------------------------------------------|-----------|---|----------|-------|
| KARAKAS_TGFB1_SIGNALING                                                                     | 1.8317298 | 0 | 4.09E-04 | 0.168 |
| REACTOME_PYRUVATE_METABOLISM_AND_CITRIC_ACID_TCA_CYCLE                                      | 1.8296903 | 0 | 4.31E-04 | 0.175 |
| GROSS_HYPOXIA_VIA_HIF1A_UP                                                                  | 1.8295425 | 0 | 4.29E-04 | 0.175 |
| APPIERTO_RESPONSE_TO_FENRETINIDE_DN                                                         | 1.829138  | 0 | 4.35E-04 | 0.177 |
| PID_MYC_ACTIV_PATHWAY                                                                       | 1.8265599 | 0 | 4.54E-04 | 0.184 |
| REACTOME_TRANSCRIPTION_COUPLED_NUCLEOTIDE_EXCISION_REPAIR_TC_NER                            | 1.8250072 | 0 | 4.70E-04 | 0.19  |
| JOHANSSON_GLIOMAGENESIS_BY_PDGF_UP                                                          | 1.8241004 | 0 | 4.80E-04 | 0.194 |
| REACTOME_PCP_CE_PATHWAY                                                                     | 1.8177099 | 0 | 5.36E-04 | 0.215 |
| MOOHTA_FFA_OXYDATION                                                                        | 1.81692   | 0 | 5.43E-04 | 0.219 |
| XU_RESPONSE_TO_TRETINOIN_AND_NSC682994_DN                                                   | 1.8160775 | 0 | 5.44E-04 | 0.22  |
| IVANOVA_HEMATOPOIESIS_INTERMEDIATE_PROGENITOR                                               | 1.8122308 | 0 | 5.80E-04 | 0.232 |
| KEGG_ONE_CARBON_POOL_BY_FOLATE                                                              | 1.8112503 | 0 | 5.89E-04 | 0.236 |
| SANSOM_APC_TARGETS_REQUIRE_MYC                                                              | 1.809142  | 0 | 6.11E-04 | 0.244 |
| REACTOME_CITRIC_ACID_CYCLE_TCA_CYCLE                                                        | 1.8090429 | 0 | 6.09E-04 | 0.244 |
| ZHONG_SECRETOME_OF_LUNG_CANCER_AND_FIBROBLAST                                               | 1.8087606 | 0 | 6.16E-04 | 0.247 |
| BENPORATH_ES_2                                                                              | 1.8071458 | 0 | 6.43E-04 | 0.259 |
| REACTOME_MRNA_CAPPING                                                                       | 1.8059963 | 0 | 6.58E-04 | 0.263 |
| REACTOME_TRANSLESION_SYNTHESIS_BY_Y_FAMILY_DNA_POLYMERASES_BYPASSES_LESIONS_ON_DNA_TEMPLATE | 1.8041166 | 0 | 6.80E-04 | 0.271 |

|                                                                            |           |             |          |       |
|----------------------------------------------------------------------------|-----------|-------------|----------|-------|
| REACTOME_PROCESSING_OF_CAPPED_INTRON_CONTAINING_PR<br>E_MRNA               | 1.8021319 | 0           | 7.14E-04 | 0.28  |
| REACTOME_FATTY_ACYL_COA_BIOSYNTHESIS                                       | 1.8016361 | 0           | 7.16E-04 | 0.282 |
| REACTOME_TRANSPORT_OF_THE_SLBP_DEPENDANT_MATURE_<br>MRNA                   | 1.8014843 | 0           | 7.14E-04 | 0.282 |
| CAFFAREL_RESPONSE_TO_THC_24HR_5_DN                                         | 1.799474  | 0           | 7.38E-04 | 0.293 |
| PELLICCIOTTA_HDAC_IN_ANTIGEN_PRESENTATION_DN                               | 1.7991705 | 0           | 7.42E-04 | 0.295 |
| GOLDRATH_HOMEOSTATIC_PROLIFERATION                                         | 1.79917   | 0           | 7.40E-04 | 0.295 |
| CHEN_ETV5_TARGETS_TESTIS                                                   | 1.7987163 | 0           | 7.48E-04 | 0.3   |
| REACTOME_TRANSPORT_OF_MATURE_MRNAS_DERIVED_FROM_<br>INTRONLESS_TRANSCRIPTS | 1.7986495 | 0           | 7.46E-04 | 0.3   |
| REACTOME_DUAL_INCISION_IN_GG_NER                                           | 1.7976185 | 0           | 7.62E-04 | 0.305 |
| KEGG_OOCYTE_MEIOSIS                                                        | 1.7973859 | 0           | 7.62E-04 | 0.306 |
| REACTOME_CELLULAR_RESPONSE_TO_HYPOXIA                                      | 1.7971706 | 0           | 7.62E-04 | 0.307 |
| REACTOME_GENE_SILENCING_BY_RNA                                             | 1.796867  | 0           | 7.64E-04 | 0.308 |
| BURTON_ADIPOGENESIS_4                                                      | 1.7963766 | 0           | 7.70E-04 | 0.312 |
| IVANOVA_HEMATOPOIESIS_EARLY_PROGENITOR                                     | 1.7935168 | 0           | 8.26E-04 | 0.331 |
| CAFFAREL_RESPONSE_TO_THC_DN                                                | 1.7933944 | 0           | 8.26E-04 | 0.332 |
| REACTOME_TERMINATION_OF_TRANSLESION_DNA_SYNTHESIS                          | 1.7930204 | 0.001264223 | 8.31E-04 | 0.334 |
| REACTOME_SIGNALING_BY_NOTCH4                                               | 1.7923808 | 0           | 8.39E-04 | 0.337 |
| REACTOME_GLOBAL_GENOME_NUCLEOTIDE_EXCISION_REPAIR                          | 1.7921991 | 0           | 8.37E-04 | 0.337 |

|                                                          |           |             |             |       |
|----------------------------------------------------------|-----------|-------------|-------------|-------|
| _GG_NER                                                  |           |             |             |       |
| REACTOME_NUCLEAR_IMPORT_OF_REV_PROTEIN                   | 1.7914424 | 0           | 8.43E-04    | 0.339 |
| PELLICCIOTTA_HDAC_IN_ANTIGEN_PRESENTATION_UP             | 1.790667  | 0.001146789 | 8.46E-04    | 0.341 |
| WILCOX_RESPONSE_TO_PROGESTERONE_UP                       | 1.7889124 | 0           | 8.91E-04    | 0.354 |
| REACTOME_RHO_GTPASE_EFFECTORS                            | 1.7873037 | 0           | 9.37E-04    | 0.372 |
| REACTOME_TRANSLESION_SYNTHESIS_BY_POLK                   | 1.7871504 | 0.002710027 | 9.36E-04    | 0.373 |
| KEGG_ALZHEIMERS_DISEASE                                  | 1.783252  | 0           | 0.001012174 | 0.396 |
| SUNG_METASTASIS_STROMA_DN                                | 1.7787333 | 0           | 0.001091565 | 0.423 |
| HONMA_DOCETAXEL_RESISTANCE                               | 1.7753417 | 0           | 0.00115254  | 0.445 |
| REACTOME_TRNA_MODIFICATION_IN_THE_NUCLEUS_AND_CYTOSOL    | 1.7745025 | 0           | 0.001157338 | 0.447 |
| BURTON_ADIPOGENESIS_5                                    | 1.7728347 | 0           | 0.001191942 | 0.457 |
| REACTOME_DETOXIFICATION_OF_REACTIVE_OXYGEN_SPECIES       | 1.772416  | 0           | 0.001194601 | 0.459 |
| LASTOWSKA_NEUROBLASTOMA_COPY_NUMBER_UP                   | 1.7705523 | 0           | 0.001232851 | 0.473 |
| ZHONG_RESPONSE_TO_AZACITIDINE_AND_TSA_DN                 | 1.768709  | 0           | 0.001261043 | 0.48  |
| REACTOME_INTERACTIONS_OF_VPR_WITH_HOST_CELLULAR_PROTEINS | 1.7683905 | 0           | 0.001261534 | 0.481 |
| KIM_ALL_DISORDERS_DURATION_CORR_DN                       | 1.7680881 | 0           | 0.001261994 | 0.483 |
| HU_ANGIOGENESIS_DN                                       | 1.7668574 | 0           | 0.001291815 | 0.493 |
| COLLER_MYC_TARGETS_UP                                    | 1.7665943 | 0           | 0.001288314 | 0.493 |
| OLSSON_E2F3_TARGETS_DN                                   | 1.7658992 | 0           | 0.001302288 | 0.497 |



|                                                        |           |             |             |       |
|--------------------------------------------------------|-----------|-------------|-------------|-------|
| WONG_PROTEASOME_GENE_MODULE                            | 1.7658522 | 0           | 0.001300736 | 0.498 |
| GAZDA_DIAMOND_BLACKFAN_ANEMIA_PROGENITOR_DN            | 1.7634546 | 0           | 0.001355452 | 0.514 |
| KEGG_CITRATE_CYCLE_TCA_CYCLE                           | 1.762482  | 0           | 0.001367297 | 0.518 |
| REACTOME_MEIOSIS                                       | 1.7619784 | 0           | 0.001369384 | 0.52  |
| VANTVEER_BREAST_CANCER_POOR_PROGNOSIS                  | 1.7603105 | 0           | 0.001406085 | 0.53  |
| PRAMOONJAGO_SOX4_TARGETS_DN                            | 1.758051  | 0           | 0.001476992 | 0.548 |
| REACTOME_HEDGEHOG_OFF_STATE                            | 1.7552583 | 0           | 0.001526551 | 0.564 |
| BASSO_B_LYMPHOCYTE_NETWORK                             | 1.7550131 | 0           | 0.001535813 | 0.567 |
| KEGG_VALINE_LEUCINE_AND_ISOLEUCINE_DEGRADATION         | 1.7549738 | 0.001179245 | 0.001531761 | 0.567 |
| BIOCARTA_MCM_PATHWAY                                   | 1.7541112 | 0           | 0.001556082 | 0.572 |
| CAFFAREL_RESPONSE_TO_THC_24HR_5_UP                     | 1.7517487 | 0           | 0.001625674 | 0.589 |
| REACTOME_FORMATION_OF_THE_EARLY_ELONGATION_COMPL<br>EX | 1.7514207 | 0           | 0.001625148 | 0.59  |
| REACTOME_UCH_PROTEINASES                               | 1.7504739 | 0           | 0.001654756 | 0.598 |
| ZHONG_SECRETOME_OF_LUNG_CANCER_AND_ENDOTHELIUM         | 1.7496305 | 0           | 0.001674834 | 0.602 |
| REACTOME_TRANSCRIPTIONAL_REGULATION_BY_RUNX2           | 1.7495075 | 0           | 0.001672359 | 0.602 |
| LEE_METASTASIS_AND_RNA_PROCESSING_UP                   | 1.7482011 | 0           | 0.001703458 | 0.607 |
| REACTOME_MITOCHONDRIAL_FATTY_ACID_BETA_OXIDATION       | 1.7471498 | 0           | 0.001738089 | 0.614 |
| REACTOME_CONDENSATION_OF_PROPHASE_CHROMOSOMES          | 1.7469615 | 0           | 0.001744728 | 0.616 |
| REACTOME_SUMOYLATION_OF_SUMOYLATION_PROTEINS           | 1.7463013 | 0           | 0.001768079 | 0.623 |
| DAIRKEE_CANCER_PRONE_RESPONSE_BPA                      | 1.74358   | 0           | 0.001855688 | 0.644 |

|                                                                                          |           |             |             |       |
|------------------------------------------------------------------------------------------|-----------|-------------|-------------|-------|
| WHITFIELD_CELL_CYCLE_S                                                                   | 1.7430316 | 0           | 0.001871198 | 0.647 |
| REACTOME_MITOTIC_PROPHASE                                                                | 1.7425604 | 0           | 0.001886704 | 0.656 |
| REACTOME_NUCLEOBASE_BIOSYNTHESIS                                                         | 1.7423974 | 0.001342282 | 0.001892873 | 0.657 |
| YAO_TEMPORAL_RESPONSE_TO_PROGESTERONE_CLUSTER_15                                         | 1.7414372 | 0           | 0.001922753 | 0.664 |
| REACTOME_EXPORT_OF_VIRAL_RIBONUCLEOPROTEINS_FROM_NUCLEUS                                 | 1.7405778 | 0           | 0.001948881 | 0.674 |
| REACTOME_HIV_LIFE_CYCLE                                                                  | 1.7401948 | 0           | 0.001960323 | 0.677 |
| KEGG_SPLICEOSOME                                                                         | 1.7400458 | 0           | 0.001957182 | 0.678 |
| REACTOME_DEFECTIVE_TPR_MAY_CONFER_SUSCEPTIBILITY_TOWARDS_THYROID_PAPILLARY_CARCINOMA_TPC | 1.7365003 | 0           | 0.00208795  | 0.702 |
| PID_E2F_PATHWAY                                                                          | 1.7353499 | 0           | 0.002122314 | 0.709 |
| REACTOME_NUCLEOTIDE_EXCISION_REPAIR                                                      | 1.7333847 | 0           | 0.002194519 | 0.719 |
| KEGG_BASE_EXCISION_REPAIR                                                                | 1.732458  | 0.002525253 | 0.002233991 | 0.725 |
| HONRADO_BREAST_CANCER_BRCA1_VS_BRCA2                                                     | 1.731011  | 0.002638523 | 0.00226426  | 0.733 |
| PYEON_HPV_POSITIVE_TUMORS_UP                                                             | 1.7308666 | 0           | 0.002264003 | 0.734 |
| REACTOME_PIWI_INTERACTING_RNA_PIRNA_BIOGENESIS                                           | 1.7300875 | 0.00127551  | 0.002290485 | 0.74  |
| SESTO_RESPONSE_TO_UV_C7                                                                  | 1.7290072 | 0           | 0.002341552 | 0.751 |
| NATSUME_RESPONSE_TO_INTERFERON_BETA_DN                                                   | 1.7279782 | 0           | 0.002387191 | 0.758 |
| WANG_METASTASIS_OF_BREAST_CANCER_ESR1_UP                                                 | 1.727479  | 0           | 0.002409626 | 0.762 |
| TSENG_IRS1_TARGETS_UP                                                                    | 1.726736  | 0           | 0.002431973 | 0.765 |
| ALONSO_METASTASIS_UP                                                                     | 1.7266886 | 0           | 0.002431335 | 0.766 |

|                                                                 |           |             |             |       |
|-----------------------------------------------------------------|-----------|-------------|-------------|-------|
| REACTOME_DEGRADATION_OF_BETA_CATENIN_BY_THE_DESTRUCTION_COMPLEX | 1.7265117 | 0           | 0.002428901 | 0.766 |
| REACTOME_HOST_INTERACTIONS_WITH_INFLUENZA_FACTORS               | 1.7261477 | 0.001197605 | 0.002435254 | 0.767 |
| JIANG_AGING_HYPOTHALAMUS_UP                                     | 1.7221211 | 0           | 0.002607612 | 0.791 |
| REACTOME_METABOLISM_OF_FOLATE_AND_PTERINES                      | 1.7219675 | 0.001360544 | 0.002616969 | 0.794 |
| REACTOME_RNA_POLYMERASE_I_PROMOTER_ESCAPE                       | 1.7216433 | 0           | 0.002631517 | 0.795 |
| IWANAGA_E2F1_TARGETS_INDUCED_BY_SERUM                           | 1.7205436 | 0           | 0.002696379 | 0.805 |
| JAIN_NFKB_SIGNALING                                             | 1.7183406 | 0           | 0.002788686 | 0.814 |
| GARY_CD5_TARGETS_DN                                             | 1.7178177 | 0           | 0.002816546 | 0.82  |
| YAMAZAKI_TCEB3_TARGETS_DN                                       | 1.7174141 | 0           | 0.002832217 | 0.824 |
| KEGG_AMINO_SUGAR_AND_NUCLEOTIDE_SUGAR_METABOLISM                | 1.7170846 | 0           | 0.002849459 | 0.826 |
| REACTOME_ANTIGEN_PROCESSING_CROSS_PRESENTATION                  | 1.7161047 | 0           | 0.002900976 | 0.828 |
| BIOCARTA_G2_PATHWAY                                             | 1.7142457 | 0.00618047  | 0.002990024 | 0.836 |
| KIM_MYC_AMPLIFICATION_TARGETS_UP                                | 1.7139647 | 0           | 0.002994881 | 0.836 |
| LI_WILMS_TUMOR_VS_FETAL_KIDNEY_2_UP                             | 1.7137778 | 0.001259446 | 0.002992922 | 0.836 |
| WILLIAMS_ESR1_TARGETS_UP                                        | 1.7130488 | 0           | 0.00302315  | 0.84  |
| REACTOME_NUCLEAR_ENVELOPE_BREAKDOWN                             | 1.7125559 | 0           | 0.003039774 | 0.841 |
| REACTOME_DUAL_INCISION_IN_TC_NER                                | 1.7122916 | 0           | 0.003042824 | 0.842 |
| DORMOY_ELAVL1_TARGETS                                           | 1.7100211 | 0           | 0.003174007 | 0.852 |
| TONKS_TARGETS_OF_RUNX1_RUNX1T1_FUSION_MONOCYTE_UP               | 1.7072334 | 0           | 0.003323066 | 0.863 |
| REACTOME_INHIBITION_OF_THE_PROTEOLYTIC_ACTIVITY_OF_             | 1.7071499 | 0.002631579 | 0.003327022 | 0.865 |

|                                                                                                                                     |           |             |             |       |
|-------------------------------------------------------------------------------------------------------------------------------------|-----------|-------------|-------------|-------|
| APC_C_REQUIRED_FOR_THE_ONSET_OF_ANAPHASE_BY_MITOTI<br>C_SPINDLE_CHECKPOINT_COMPONENTS                                               |           |             |             |       |
| XU_HGF_TARGETS_INDUCED_BY_AKT1_48HR_DN                                                                                              | 1.7051865 | 0           | 0.003443227 | 0.877 |
| BROWN_MYELOID_CELL_DEVELOPMENT_DN                                                                                                   | 1.7050356 | 0           | 0.003436925 | 0.878 |
| REACTOME_TRISTETRAPROLIN_TTP_ZFP36_BINDS_AND_DESTAB<br>ILIZES_MRNA                                                                  | 1.7017415 | 0.001377411 | 0.003628891 | 0.894 |
| REACTOME_MAPK6_MAPK4_SIGNALING                                                                                                      | 1.7004294 | 0           | 0.003705452 | 0.899 |
| REACTOME_BIOSYNTHESIS_OF_THE_N_GLYCAN_PRECURSOR_D<br>OLICHOL_LIPID_LINKED_OLIGOSACCHARIDE_LLO_AND_TRANS<br>FER_TO_A_NASCENT_PROTEIN | 1.7002939 | 0           | 0.003703542 | 0.899 |
| BORCZUK_MALIGNANT_MESOTHELIOMA_UP                                                                                                   | 1.699822  | 0           | 0.003716538 | 0.9   |
| MOOTHA_TCA                                                                                                                          | 1.6995132 | 0.003968254 | 0.003722859 | 0.901 |
| REACTOME_RNA_POLYMERASE_II_TRANSCRIPTION_ELONGATIO<br>N                                                                             | 1.6962006 | 0           | 0.003900577 | 0.91  |
| REACTOME_ABORTIVE_ELONGATION_OF_HIV_1_TRANSCRIPT_IN<br>_THE_ABSENCE_OF_TAT                                                          | 1.6930425 | 0.001262626 | 0.004100254 | 0.918 |
| PID_ATM_PATHWAY                                                                                                                     | 1.6916867 | 0.00122399  | 0.004179402 | 0.923 |
| KEGG_RNA_POLYMERASE                                                                                                                 | 1.6902215 | 0.001290323 | 0.004274617 | 0.926 |
| STEIN_ESRRA_TARGETS                                                                                                                 | 1.6901202 | 0           | 0.004281232 | 0.926 |
| REACTOME_DNA_METHYLATION                                                                                                            | 1.6893035 | 0.002512563 | 0.004335039 | 0.928 |
| REACTOME_MRNA_SPLICING                                                                                                              | 1.6887845 | 0           | 0.004357809 | 0.93  |

|                                                                               |           |             |             |       |
|-------------------------------------------------------------------------------|-----------|-------------|-------------|-------|
| KEGG_RNA_DEGRADATION                                                          | 1.6865749 | 0.001180638 | 0.004502048 | 0.935 |
| REACTOME_FORMATION_OF_HIV_ELONGATION_COMPLEX_IN_THE_ABSENCE_OF_HIV_TAT        | 1.6864723 | 0.00120919  | 0.004503265 | 0.935 |
| LE_NEURONAL_DIFFERENTIATION_DN                                                | 1.6855619 | 0           | 0.004549677 | 0.937 |
| MEINHOLD_OVARIAN_CANCER_LOW_GRADE_DN                                          | 1.6838309 | 0           | 0.004673321 | 0.943 |
| THILLAINADESAN_ZNF217_TARGETS_UP                                              | 1.6813697 | 0           | 0.004839555 | 0.949 |
| DAIRKEE_CANCER_PRONE_RESPONSE_BPA_E2                                          | 1.6797855 | 0.001086957 | 0.004968314 | 0.953 |
| REACTOME_REGULATION_OF_HSF1_MEDIATED_HEAT_SHOCK_RESPONSE                      | 1.6787193 | 0           | 0.005037208 | 0.956 |
| SLEBOS_HEAD_AND_NECK_CANCER_WITH_HPV_UP                                       | 1.6784077 | 0           | 0.00504042  | 0.956 |
| WANG_TUMOR_INVASIVENESS_UP                                                    | 1.6782765 | 0           | 0.00503882  | 0.956 |
| REACTOME_FORMATION_OF_ATP_BY_CHEMIOSMOTIC_COUPLING                            | 1.6780392 | 0.008275862 | 0.005046797 | 0.956 |
| KEGG_PROPANOATE_METABOLISM                                                    | 1.6741171 | 0.001256281 | 0.005345253 | 0.962 |
| REACTOME_TRANSCRIPTION_OF_E2F_TARGETS_UNDER_NEGATIVE_CONTROL_BY_DREAM_COMPLEX | 1.6739978 | 0.001335114 | 0.005346125 | 0.962 |
| KOINUMA_COLON_CANCER_MSI_UP                                                   | 1.6735444 | 0.002781641 | 0.005380265 | 0.963 |
| REACTOME_PROTEIN_LOCALIZATION                                                 | 1.6732125 | 0           | 0.005403169 | 0.964 |
| REACTOME_MRNA_SPLICING_MINOR_PATHWAY                                          | 1.6728883 | 0           | 0.005429057 | 0.964 |
| NIKOLSKY_BREAST_CANCER_17Q21_Q25_AMPLICON                                     | 1.6714519 | 0           | 0.005564729 | 0.967 |
| CHIARETTI_T_ALL_RELAPSE_PROGNOSIS                                             | 1.6704284 | 0.002684564 | 0.005638848 | 0.967 |

|                                                           |           |             |             |       |
|-----------------------------------------------------------|-----------|-------------|-------------|-------|
| KIM_WT1_TARGETS_DN                                        | 1.6702172 | 0           | 0.005650078 | 0.968 |
| REACTOME_RNA_POLYMERASE_II_PRE_TRANSCRIPTION_EVENTS       | 1.6688117 | 0.001096491 | 0.00578748  | 0.972 |
| POOLA_INVASIVE_BREAST_CANCER_UP                           | 1.6678268 | 0           | 0.005890077 | 0.976 |
| REACTOME_PHOSPHORYLATION_OF_THE_APC_C                     | 1.6673868 | 0.00136612  | 0.005910033 | 0.976 |
| MOHANKUMAR_HOXA1_TARGETS_UP                               | 1.6673075 | 0           | 0.005908182 | 0.976 |
| BURTON_ADIPOGENESIS_6                                     | 1.665879  | 0           | 0.006036137 | 0.981 |
| WANG_TARGETS_OF_MLL_CBP_FUSION_DN                         | 1.6657581 | 0.001191895 | 0.006030902 | 0.981 |
| UDAYAKUMAR_MED1_TARGETS_UP                                | 1.6650679 | 0           | 0.006079555 | 0.982 |
| MAYBURD_RESPONSE_TO_L663536_DN                            | 1.6647465 | 0.001172333 | 0.006091176 | 0.982 |
| REACTOME_MITOCHONDRIAL_CALCIUM_ION_TRANSPORT              | 1.6645195 | 0.005298013 | 0.006104277 | 0.983 |
| HERNANDEZ_MITOTIC_ARREST_BY_DOCETAXEL_1_DN                | 1.662559  | 0           | 0.006282254 | 0.987 |
| BOYALT_LIVER_CANCER_SUBCLASS_G123_UP                      | 1.6622444 | 0           | 0.006307124 | 0.987 |
| REACTOME_MRNA_DECAY_BY_3_TO_5_EXORIBONUCLEASE             | 1.6618111 | 0.002721089 | 0.006356171 | 0.987 |
| BOHN_PRIMARY_IMMUNODEFICIENCY_SYNDROM_UP                  | 1.659806  | 0.001213592 | 0.006566134 | 0.988 |
| KEGG_TYROSINE_METABOLISM                                  | 1.6585902 | 0           | 0.00666916  | 0.988 |
| REACTOME_PURINE_CATABOLISM                                | 1.6582942 | 0.004043127 | 0.006680849 | 0.989 |
| GROSS_HYPOXIA_VIA_ELK3_UP                                 | 1.6577892 | 0           | 0.006721241 | 0.989 |
| GEORGES_CELL_CYCLE_MIR192_TARGETS                         | 1.6571968 | 0.002314815 | 0.006767428 | 0.99  |
| REACTOME_TP53_REGULATES_TRANSCRIPTION_OF_DNA_REPAIR_GENES | 1.6565536 | 0           | 0.006834519 | 0.99  |

|                                                                      |           |             |             |       |
|----------------------------------------------------------------------|-----------|-------------|-------------|-------|
| REACTOME_APC_CDC20_MEDIATED_DEGRADATION_OF_NEK2A                     | 1.6558677 | 0.001349528 | 0.006884779 | 0.991 |
| SANA_RESPONSE_TO_IFNG_DN                                             | 1.6546974 | 0           | 0.00700367  | 0.991 |
| REACTOME_BUTYRATE_RESPONSE_FACTOR_1_BRF1_BINDS_AND_DESTABILIZES_MRNA | 1.6523647 | 0.00390117  | 0.007238561 | 0.992 |
| REACTOME_TNFR2_NON_CANONICAL_NF_KB_PATHWAY                           | 1.6512071 | 0           | 0.007350352 | 0.993 |
| REACTOME_RRNA_PROCESSING                                             | 1.6501526 | 0           | 0.007463197 | 0.993 |
| REACTOME_FGFR2_MUTANT_RECEPTOR_ACTIVATION                            | 1.6501518 | 0.00125     | 0.007447809 | 0.993 |
| WALLACE_JAK2_TARGETS_UP                                              | 1.649483  | 0.006451613 | 0.007513988 | 0.993 |
| KRASNOSELSKAYA_ILF3_TARGETS_DN                                       | 1.6482657 | 0.002378121 | 0.007636173 | 0.993 |
| KENNY_CTNNB1_TARGETS_UP                                              | 1.6473545 | 0           | 0.007704569 | 0.993 |
| REACTOME_FGFR2_ALTERNATIVE_SPLICING                                  | 1.6451278 | 0.002522068 | 0.00791391  | 0.994 |
| HILLION_HMGA1B_TARGETS                                               | 1.6446406 | 0           | 0.007968284 | 0.995 |
| CHEN_HOXA5_TARGETS_9HR_DN                                            | 1.6439288 | 0.003658537 | 0.008039933 | 0.997 |
| REACTOME_TRANSCRIPTIONAL_REGULATION_BY_E2F6                          | 1.643252  | 0.001218027 | 0.008113001 | 0.997 |
| CREIGHTON_AKT1_SIGNALING_VIA_MTOR_DN                                 | 1.6431553 | 0.002610966 | 0.008106785 | 0.997 |
| REACTOME_CELLULAR_RESPONSE_TO_HEAT_STRESS                            | 1.6424758 | 0           | 0.008163318 | 0.997 |
| REACTOME_CELLULAR_RESPONSES_TO_STRESS                                | 1.6407791 | 0           | 0.008347711 | 0.998 |
| REACTOME_TRANSCRIPTION_OF_THE_HIV_GENOME                             | 1.639478  | 0.001138952 | 0.008493439 | 0.998 |
| ZHONG_SECRETOME_OF_LUNG_CANCER_AND_MACROPHAGE                        | 1.6380944 | 0.001116072 | 0.008661673 | 0.998 |
| COLINA_TARGETS_OF_4EBP1_AND_4EBP2                                    | 1.6357806 | 0           | 0.008964982 | 0.998 |
| REACTOME_SIGNALING_BY_FGFR2_III_A_TM                                 | 1.6355006 | 0.002621232 | 0.00900194  | 0.998 |

|                                                                        |           |             |             |       |
|------------------------------------------------------------------------|-----------|-------------|-------------|-------|
| AIYAR_COBRA1_TARGETS_DN                                                | 1.631163  | 0.001261034 | 0.009580088 | 0.998 |
| TURASHVILI_BREAST_DUCTAL_CARCINOMA_VS_LOBULAR_NOR<br>MAL_UP            | 1.6310252 | 0           | 0.009584004 | 0.998 |
| REACTOME_SUMOYLATION_OF_UBIQUITINYLATION_PROTEINS                      | 1.6307597 | 0.001201923 | 0.009606513 | 0.998 |
| REACTOME_REPRODUCTION                                                  | 1.630256  | 0.001075269 | 0.00965188  | 0.998 |
| KEGG_PROTEIN_EXPORT                                                    | 1.629872  | 0.003861004 | 0.009698371 | 0.999 |
| REACTOME_METABOLISM_OF_PORPHYRINS                                      | 1.6293149 | 0.005486968 | 0.009761862 | 0.999 |
| PODAR_RESPONSE_TO_ADAPHOSTIN_DN                                        | 1.6289097 | 0.005174644 | 0.00979817  | 0.999 |
| CHIARADONNA_NEOPLASTIC_TRANSFORMATION_KRAS_UP                          | 1.6286304 | 0           | 0.009824265 | 0.999 |
| BRACHAT_RESPONSE_TO_CAMPTOTHECIN_DN                                    | 1.6277072 | 0.005966587 | 0.009933873 | 0.999 |
| REACTOME_FORMATION_OF_TC_NER_PRE_INCISION_COMPLEX                      | 1.6275657 | 0.00472255  | 0.009941277 | 0.999 |
| REACTOME_SIGNALING_BY_HEDGEHOG                                         | 1.6273881 | 0           | 0.009945807 | 0.999 |
| WALLACE_PROSTATE_CANCER_UP                                             | 1.62495   | 0.002610966 | 0.010320969 | 0.999 |
| KORKOLA_TERATOMA                                                       | 1.6238718 | 0.003554502 | 0.010459717 | 0.999 |
| ELVIDGE_HYPOXIA_DN                                                     | 1.6230105 | 0           | 0.010582591 | 0.999 |
| KEGG_FATTY_ACID_METABOLISM                                             | 1.6229651 | 0.002403846 | 0.01057317  | 0.999 |
| REACTOME_CONVERSION_FROM_APC_C:CDH1_TO_APC_C:CDH1<br>_IN_LATE_ANAPHASE | 1.6225756 | 0.001312336 | 0.010619825 | 0.999 |
| ONDER_CDH1_TARGETS_1_DN                                                | 1.6217937 | 0           | 0.010710923 | 0.999 |
| KEGG_PORPHYRIN_AND_CHLOROPHYLL_METABOLISM                              | 1.6216413 | 0.006361323 | 0.01070134  | 0.999 |
| REACTOME_KINESINS                                                      | 1.6212567 | 0.002366864 | 0.010755773 | 0.999 |



|                                                                              |           |             |             |       |
|------------------------------------------------------------------------------|-----------|-------------|-------------|-------|
| SHAFFER_IRF4_TARGETS_IN_ACTIVATED_B_LYMPHOCYTE                               | 1.6203222 | 0           | 0.010911337 | 0.999 |
| BROWNE_HCMV_INFECTION_2HR_DN                                                 | 1.6176118 | 0.00591716  | 0.011344519 | 0.999 |
| CHAUHAN_RESPONSE_TO_METHOXYESTRADIOL_UP                                      | 1.6175896 | 0.004739337 | 0.011326888 | 0.999 |
| REACTOME_FANCONI_ANEMIA_PATHWAY                                              | 1.6172138 | 0.003680982 | 0.011356189 | 0.999 |
| LI_LUNG_CANCER                                                               | 1.615857  | 0.001221001 | 0.011579629 | 0.999 |
| REACTOME_ACTIVATION_OF_NF_KAPPAB_IN_B_CELLS                                  | 1.6139255 | 0.002288329 | 0.011907897 | 1     |
| REACTOME_RRNA_PROCESSING_IN_THE_NUCLEUS_AND_CYTOSOL                          | 1.613351  | 0           | 0.011993738 | 1     |
| PID_AURORA_A_PATHWAY                                                         | 1.6125673 | 0.002466091 | 0.012117342 | 1     |
| JEON_SMAD6_TARGETS_DN                                                        | 1.6120869 | 0.006493507 | 0.012200996 | 1     |
| REACTOME_AURKA_ACTIVATION_BY_TPX2                                            | 1.611715  | 0           | 0.01223655  | 1     |
| BIOCARTA_CELLCYCLE_PATHWAY                                                   | 1.6113286 | 0.00656168  | 0.012270525 | 1     |
| REACTOME_RNA_POLYMERASE_II_TRANSCRIPTION_PRE_INITIATION_AND_PROMOTER_OPENING | 1.6110402 | 0.001218027 | 0.012305791 | 1     |
| REACTOME_KSRP_KHSRP_BINDS_AND_DESTABILIZES_MRNA                              | 1.6105094 | 0.002881844 | 0.012370748 | 1     |
| LU_EZH2_TARGETS_UP                                                           | 1.6104589 | 0           | 0.012357006 | 1     |
| REACTOME_RNA_POLYMERASE_II_TRANSCRIPTION_TERMINATION                         | 1.6103655 | 0.001149425 | 0.012347283 | 1     |
| SAKAI_TUMOR_INFILTRATING_MONOCYTES_DN                                        | 1.6101795 | 0.001103753 | 0.012357869 | 1     |
| RAMALHO_STEMNESS_UP                                                          | 1.6098001 | 0           | 0.01242367  | 1     |
| REACTOME_GLYOXYLATE_METABOLISM_AND_GLYCINE_DEGRA                             | 1.607401  | 0.003731343 | 0.012807185 | 1     |

|                                                           |           |             |             |   |
|-----------------------------------------------------------|-----------|-------------|-------------|---|
| DATION                                                    |           |             |             |   |
| YANG_BCL3_TARGETS_UP                                      | 1.6039029 | 0           | 0.013411818 | 1 |
| KIM_TIAL1_TARGETS                                         | 1.6028342 | 0.007398274 | 0.0135916   | 1 |
| NEMETH_INFLAMMATORY_RESPONSE_LPS_DN                       | 1.5965607 | 0.005089059 | 0.014898213 | 1 |
| TURASHVILI_BREAST_DUCTAL_CARCINOMA_VS_DUCTAL_NORMAL_UP    | 1.5929332 | 0.004914005 | 0.015664198 | 1 |
| KEGG_PROGESTERONE_MEDIATED_OOCYTE_MATURATION              | 1.5910952 | 0           | 0.016029216 | 1 |
| KATSANOUELAVL1_TARGETS_DN                                 | 1.5877529 | 0           | 0.016771652 | 1 |
| REACTOME_METABOLISM_OF_AMINO_ACIDS_AND_DERIVATIVES        | 1.586917  | 0           | 0.016941063 | 1 |
| SANSOM_APC_TARGETS                                        | 1.5858083 | 0           | 0.017194675 | 1 |
| KARLSSON_TGFB1_TARGETS_UP                                 | 1.581903  | 0           | 0.018147686 | 1 |
| CHICAS_RB1_TARGETS_SENESCENT                              | 1.578149  | 0           | 0.019060453 | 1 |
| ACOSTA_PROLIFERATION_INDEPENDENT_MYC_TARGETS_UP           | 1.5779568 | 0.002227172 | 0.019073067 | 1 |
| TAKAO_RESPONSE_TO_UVB_RADIATION_UP                        | 1.5772189 | 0           | 0.01922898  | 1 |
| MULLIGAN_NTF3_SIGNALING_VIA_INSR_AND_IGF1R_UP             | 1.5771699 | 0.012804098 | 0.01920572  | 1 |
| REACTOME_SYNTHESIS_OF_SUBSTRATES_IN_N_GLYCAN_BIOSYNTHESES | 1.5743932 | 0.001137656 | 0.019936636 | 1 |
| REACTOME_SYNTHESIS_OF_VERY_LONG_CHAIN_FATTY_ACYL_COAS     | 1.5689429 | 0.006435006 | 0.02143522  | 1 |
| BILANGES_RAPAMYCIN_SENSITIVE_VIA_TSC1_AND_TSC2            | 1.567886  | 0.001141553 | 0.021691272 | 1 |

|                                                      |           |             |             |   |
|------------------------------------------------------|-----------|-------------|-------------|---|
| REACTOME_FATTY_ACID_METABOLISM                       | 1.5648302 | 0           | 0.022572346 | 1 |
| KAYO_CALORIE_RESTRICTION_MUSCLE_DN                   | 1.5646363 | 0.003428571 | 0.022574507 | 1 |
| BIOCARTA_MPR_PATHWAY                                 | 1.5645049 | 0.010596027 | 0.022572765 | 1 |
| TONG_INTERACT_WITH_PTTG1                             | 1.5643901 | 0.004694836 | 0.022569776 | 1 |
| SPIELMAN_LYMPHOBLAST_EUROPEAN_VS_ASIAN_UP            | 1.5641259 | 0           | 0.022618633 | 1 |
| SMID_BREAST_CANCER_RELAPSE_IN_BRAIN_UP               | 1.5634288 | 0.007556675 | 0.022787213 | 1 |
| KOKKINAKIS_METHIONINE_DEPRIVATION_96HR_DN            | 1.5633143 | 0.002252252 | 0.022770908 | 1 |
| REACTOME_SLC_TRANSPORTER_DISORDERS                   | 1.5621676 | 0.001094092 | 0.023087395 | 1 |
| STEIN_ESR1_TARGETS                                   | 1.5599678 | 0.002159827 | 0.023722198 | 1 |
| CUI_GLUCOSE_DEPRIVATION                              | 1.5594717 | 0.003488372 | 0.023815742 | 1 |
| REACTOME_GLUONEOGENESIS                              | 1.559362  | 0.008782936 | 0.023808029 | 1 |
| JACKSON_DNMT1_TARGETS_DN                             | 1.5589828 | 0.019582245 | 0.023907544 | 1 |
| PUIFFE_INVASION_INHIBITED_BY_ASCITES_UP              | 1.5583682 | 0.002267574 | 0.024052596 | 1 |
| REACTOME_ANTIVIRAL_MECHANISM_BY_IFN_STIMULATED_GENES | 1.5582114 | 0.001122335 | 0.024055926 | 1 |
| ELVIDGE_HYPOXIA_BY_DMOG_DN                           | 1.5579777 | 0.003468208 | 0.024070635 | 1 |
| VANTVEER_BREAST_CANCER_ESR1_DN                       | 1.5575016 | 0           | 0.024169046 | 1 |
| CHEN_LUNG_CANCER_SURVIVAL                            | 1.5567504 | 0.007884363 | 0.024373425 | 1 |
| REACTOME_RNA_POLYMERASE_I_TRANSCRIPTION_TERMINATION  | 1.5547142 | 0.008905852 | 0.025035482 | 1 |
| REACTOME_INFECTIOUS_DISEASE                          | 1.5540743 | 0           | 0.025181953 | 1 |

|                                                                           |           |             |             |   |
|---------------------------------------------------------------------------|-----------|-------------|-------------|---|
| JIANG_VHL_TARGETS                                                         | 1.5509514 | 0.001098901 | 0.026202809 | 1 |
| NIKOLSKY_BREAST_CANCER_16P13_AMPLICON                                     | 1.5509222 | 0           | 0.026169658 | 1 |
| LI_AMPLIFIED_IN_LUNG_CANCER                                               | 1.5507361 | 0           | 0.026179207 | 1 |
| REACTOME_PRC2_METHYLATES_HISTONES_AND_DNA                                 | 1.5501846 | 0.003663004 | 0.026331512 | 1 |
| REACTOME_REGULATION_OF_PLK1_ACTIVITY_AT_G2_M_TRANSITION                   | 1.5493778 | 0.001101322 | 0.026574725 | 1 |
| REACTOME_TRANSCRIPTIONAL_REGULATION_BY_RUNX3                              | 1.5486196 | 0           | 0.026783291 | 1 |
| JIANG_HYPOXIA_CANCER                                                      | 1.5485997 | 0.004576659 | 0.026740713 | 1 |
| MATTIOLI_MGUS_VS_PCL                                                      | 1.5458068 | 0.001082251 | 0.02767866  | 1 |
| KEGG_N_GLYCAN_BIOSYNTHESIS                                                | 1.5448799 | 0.003649635 | 0.02795244  | 1 |
| PAL_PRMT5_TARGETS_DN                                                      | 1.5443556 | 0.007772021 | 0.02812623  | 1 |
| REACTOME_MTORC1_MEDIATED_SIGNALLING                                       | 1.5442799 | 0.014248705 | 0.028107556 | 1 |
| REACTOME_NEGATIVE_EPIGENETIC_REGULATION_OF_RRNA_EXPRESSION                | 1.5429674 | 0.007918553 | 0.028560769 | 1 |
| KEGG_PENTOSE_PHOSPHATE_PATHWAY                                            | 1.5429273 | 0.017971758 | 0.028529083 | 1 |
| REACTOME_NEDDYLATION                                                      | 1.5411421 | 0           | 0.029125517 | 1 |
| CHUNG_BLISTER_CYTOTOXICITY_UP                                             | 1.5395461 | 0.001055966 | 0.029711422 | 1 |
| REACTOME_ATF4_ACTIVATES_GENES_IN_RESPONSE_TO_ENDOPLASMIC_RETICULUM_STRESS | 1.5392908 | 0.006393862 | 0.029761402 | 1 |
| REACTOME_APC_C:CDC20_MEDIATED_DEGRADATION_OF_CYCLIN_B                     | 1.5383754 | 0.015978696 | 0.030053822 | 1 |

|                                                                                 |           |             |             |   |
|---------------------------------------------------------------------------------|-----------|-------------|-------------|---|
| RIGGI_EWING_SARCOMA_PROGENITOR_DN                                               | 1.5381949 | 0           | 0.03007615  | 1 |
| REACTOME_TRANSCRIPTIONAL_REGULATION_BY_TP53                                     | 1.5369029 | 0           | 0.030496307 | 1 |
| ZHAN_VARIABLE_EARLY_DIFFERENTIATION_GENES_DN                                    | 1.5367875 | 0.017994858 | 0.030492295 | 1 |
| REACTOME_HIV_ELONGATION_ARREST_AND_RECOVERY                                     | 1.535699  | 0.006075334 | 0.030859321 | 1 |
| BENPORATH_MYC_TARGETS_WITH_EBOX                                                 | 1.5343515 | 0           | 0.031320777 | 1 |
| PEART_HDAC_PROLIFERATION_CLUSTER_UP                                             | 1.5269278 | 0.004602992 | 0.03428316  | 1 |
| REACTOME_BASE_EXCISION_REPAIR_AP_SITE_FORMATION                                 | 1.5268358 | 0.009638554 | 0.034259435 | 1 |
| RAY_TUMORIGENESIS_BY_ERBB2_CDC25A_UP                                            | 1.526095  | 0           | 0.03451974  | 1 |
| BYSTRYKH_HEMATOPOIESIS_STEM_CELL_QTL_CIS                                        | 1.5253506 | 0.001083424 | 0.034765773 | 1 |
| YORDY_RECIPROCAL_REGULATION_BY_ETS1_AND_SP100_UP                                | 1.5243908 | 0.015768725 | 0.03511459  | 1 |
| KAAB_HEART_ATRIUM_VS_VENTRICLE_DN                                               | 1.5226369 | 0           | 0.03584566  | 1 |
| REACTOME_REGULATION_OF_TP53_ACTIVITY                                            | 1.5223675 | 0.002053388 | 0.03591071  | 1 |
| REACTOME_SUMOYLATION_OF_RNA_BINDING_PROTEINS                                    | 1.5220366 | 0.007151371 | 0.03601271  | 1 |
| TOMIDA_METASTASIS_UP                                                            | 1.5219156 | 0.01369863  | 0.0360019   | 1 |
| REACTOME_CELLULAR_RESPONSES_TO_EXTERNAL_STIMULI                                 | 1.5217842 | 0           | 0.035988867 | 1 |
| CREIGHTON_ENDOCRINE_THERAPY_RESISTANCE_1                                        | 1.5208768 | 0           | 0.036319114 | 1 |
| THUM_MIR21_TARGETS_HEART_DISEASE_UP                                             | 1.519501  | 0.017832648 | 0.0368627   | 1 |
| MATZUK_MEIOTIC_AND_DNA_REPAIR                                                   | 1.5165398 | 0.007371008 | 0.03817441  | 1 |
| REACTOME_TP53_REGULATES_TRANSCRIPTION_OF_GENES_INVOLVED_IN_G2_CELL_CYCLE_ARREST | 1.515321  | 0.017105263 | 0.038666695 | 1 |
| HEIDENBLAD_AMPLICON_8Q24_UP                                                     | 1.5138958 | 0.015853658 | 0.039239258 | 1 |

|                                                                                                               |           |             |             |   |
|---------------------------------------------------------------------------------------------------------------|-----------|-------------|-------------|---|
| REACTOME_PROGRAMMED_CELL_DEATH                                                                                | 1.5132763 | 0           | 0.039476383 | 1 |
| KAAB_FAILED_HEART_ATRIUM_DN                                                                                   | 1.5130935 | 0.002083333 | 0.039493024 | 1 |
| REACTOME_NUCLEOBASE_CATABOLISM                                                                                | 1.5128013 | 0.015795868 | 0.03957444  | 1 |
| KEGG_BUTANOATE_METABOLISM                                                                                     | 1.5123893 | 0.018518519 | 0.03969572  | 1 |
| REACTOME_RNA_POLYMERASE_I_TRANSCRIPTION                                                                       | 1.5123636 | 0.005624297 | 0.039643932 | 1 |
| REACTOME_RNA_POLYMERASE_III_CHAIN_ELONGATION                                                                  | 1.5118548 | 0.018918918 | 0.03982322  | 1 |
| FARMER_BREAST_CANCER_CLUSTER_5                                                                                | 1.5118324 | 0.0198939   | 0.039765503 | 1 |
| MODY_HIPPOCAMPUS_PRENATAL                                                                                     | 1.5100858 | 0.013431014 | 0.040560063 | 1 |
| NADLER_OBESITY_DN                                                                                             | 1.5080761 | 0.016166281 | 0.041441925 | 1 |
| KAYO_AGING_MUSCLE_DN                                                                                          | 1.5050995 | 0.001070664 | 0.042818416 | 1 |
| REACTOME_TRANSCRIPTION_OF_E2F_TARGETS_UNDER_NEGATIVE_CONTROL_BY_P107_RBL1_AND_P130_RBL2_IN_COMPLEX_WITH_HDAC1 | 1.5037423 | 0.02631579  | 0.043439083 | 1 |
| REACTOME_PROCESSING_OF_SMDT1                                                                                  | 1.499365  | 0.027285129 | 0.04572911  | 1 |
| MONNIER_POSTRADIATION_TUMOR_ESCAPE_UP                                                                         | 1.499316  | 0           | 0.04567744  | 1 |
| REACTOME_RMTS METHYLATE HISTONE ARGININES                                                                     | 1.4991145 | 0.015169195 | 0.045717508 | 1 |
| REACTOME_RNA_POLYMERASE_III_TRANSCRIPTION_TERMINATION                                                         | 1.49911   | 0.023622047 | 0.04564645  | 1 |
| IVANOVA_HEMATOPOIESIS_LATE_PROGENITOR                                                                         | 1.4989604 | 0           | 0.04564137  | 1 |
| SANSOM_APC_MYC_TARGETS                                                                                        | 1.4958225 | 0           | 0.047212224 | 1 |
| SANSOM_APC_TARGETS_UP                                                                                         | 1.4949116 | 0           | 0.04759922  | 1 |

|                                                                             |           |             |             |   |
|-----------------------------------------------------------------------------|-----------|-------------|-------------|---|
| REACTOME_NONHOMOLOGOUS_END_JOINING_NHEJ                                     | 1.4941967 | 0.014218009 | 0.047951598 | 1 |
| LEE_CALORIE_RESTRICTION_NEOCORTEX_DN                                        | 1.4930867 | 0.01010101  | 0.048508357 | 1 |
| REACTOME_COOPERATION_OF_PREFOLDIN_AND_TRIC_CCT_IN_ACTIN_AND_TUBULIN_FOLDING | 1.4928902 | 0.016476553 | 0.04855486  | 1 |
| REACTOME_DEADENYLATION_DEPENDENT_MRNA_DECAY                                 | 1.4924425 | 0.018244013 | 0.048739556 | 1 |
| REACTOME_CENTROSOME_MATURATION                                              | 1.4917263 | 0.006711409 | 0.04904699  | 1 |
| LUI_THYROID_CANCER_CLUSTER_3                                                | 1.4915998 | 0.017971758 | 0.049041122 | 1 |
| POMEROY_MEDULLOBLASTOMA_PROGNOSIS_DN                                        | 1.4911838 | 0.018359853 | 0.04919459  | 1 |
| GARGALOVIC_RESPONSE_TO_OXIDIZED_PHOSPHOLIPIDS_RED_UP                        | 1.4907231 | 0.020491803 | 0.049407654 | 1 |
| BIOCARTA_G1_PATHWAY                                                         | 1.4860595 | 0.020330368 | 0.05200451  | 1 |
| REACTOME_PREFOLDIN_MEDIATED_TRANSFER_OF_SUBSTRATE_TO_CCT_TRIC               | 1.4838407 | 0.026649747 | 0.05327025  | 1 |
| REACTOME_SIGNALING_BY_RHO_GTPASES                                           | 1.4830707 | 0           | 0.05365933  | 1 |
| WENG_POR_TARGETS_LIVER_UP                                                   | 1.4830624 | 0.024600247 | 0.053583127 | 1 |
| YEGNASUBRAMANIAN_PROSTATE_CANCER                                            | 1.4821281 | 0.004390779 | 0.05406813  | 1 |
| KUNINGER_IGF1_VS_PDGF_B_TARGETS_DN                                          | 1.4820642 | 0.01703163  | 0.054023024 | 1 |
| KEGG_ALANINE_ASPARTATE_AND_GUTAMATE_METABOLISM                              | 1.4812955 | 0.016149068 | 0.054390207 | 1 |
| DAIRKEE_CANCER_PRONE_RESPONSE_E2                                            | 1.4807607 | 0.025445292 | 0.054639716 | 1 |
| NIKOLSKY_BREAST_CANCER_8Q23_Q24_AMPLICON                                    | 1.4806496 | 0.002105263 | 0.054633174 | 1 |
| REACTOME_DNA_DAMAGE_RECOGNITION_IN_GG_NER                                   | 1.4798951 | 0.025094103 | 0.05501574  | 1 |

|                                                                 |           |             |             |   |
|-----------------------------------------------------------------|-----------|-------------|-------------|---|
| DITTMER_PTHLH_TARGETS_UP                                        | 1.4798329 | 0.004352557 | 0.054973997 | 1 |
| REACTOME_DNA_DAMAGE_TELOMERE_STRESS_INDUCED_SENESCENCE          | 1.4793931 | 0.009569378 | 0.055146422 | 1 |
| KEGG_GLYOXYLATE_AND_DICARBOXYLATE_METABOLISM                    | 1.4789104 | 0.02486911  | 0.055372693 | 1 |
| REACTOME_TP53_REGULATES_TRANSCRIPTION_OF_CELL_CYCLE_GENES       | 1.4781762 | 0.01988304  | 0.055748474 | 1 |
| LEE_TARGETS_OF_PTCH1_AND_SUFU_UP                                | 1.478007  | 0.017814728 | 0.055752322 | 1 |
| MACLACHLAN_BRCA1_TARGETS_DN                                     | 1.4774582 | 0.035422344 | 0.056054283 | 1 |
| SMIRNOV_RESPONSE_TO_IR_6HR_DN                                   | 1.4772017 | 0.003171247 | 0.056139637 | 1 |
| REACTOME_SUMOYLATION_OF_DNA_DAMAGE_RESPONSE_AND_REPAIR_PROTEINS | 1.477095  | 0.015730336 | 0.056115292 | 1 |
| ZHAN_MULTIPLE_MYELOMA_CD2_DN                                    | 1.4765486 | 0.020359281 | 0.056356918 | 1 |
| KEGG_PEROXISOME                                                 | 1.4762957 | 0.011135858 | 0.05645688  | 1 |
| ANDERSEN_CHOLANGIOCARCINOMA_CLASS2                              | 1.4748371 | 0.002076843 | 0.057296462 | 1 |
| KEGG_PYRUVATE_METABOLISM                                        | 1.4733461 | 0.026796589 | 0.058161095 | 1 |
| STEIN_ESRRA_TARGETS_RESPONSIVE_TO_ESTROGEN_UP                   | 1.4725239 | 0.02625     | 0.058595587 | 1 |
| SESTO_RESPONSE_TO_UV_C6                                         | 1.4715475 | 0.02366127  | 0.059137993 | 1 |
| REACTOME_DOWNSTREAM_SIGNALING_EVENTS_OF_B_CELL_RECEPTOR_BCR     | 1.4713321 | 0.006637168 | 0.059188176 | 1 |
| JIANG_AGING_CEREBRAL_CORTEX_UP                                  | 1.4696714 | 0.022836538 | 0.060232636 | 1 |
| REACTOME_PEROXISOMAL_LIPID_METABOLISM                           | 1.4680831 | 0.025542784 | 0.0611534   | 1 |



|                                                                           |           |             |             |   |
|---------------------------------------------------------------------------|-----------|-------------|-------------|---|
| REACTOME_SIGNALING_BY_NOTCH                                               | 1.466041  | 0.001027749 | 0.062424347 | 1 |
| LIEN_BREAST_CARCINOMA_METAPLASTIC_VS_DUCTAL_UP                            | 1.4647259 | 0.016574586 | 0.06323196  | 1 |
| FARMER_BREAST_CANCER_APOCRINE_VS_BASAL                                    | 1.4634118 | 0           | 0.06407582  | 1 |
| REACTOME_FCERI_MEDIATED_NF_KB_ACTIVATION                                  | 1.4622335 | 0.006550218 | 0.06485651  | 1 |
| REACTOME_BETA_CATENIN_INDEPENDENT_WNT_SIGNALING                           | 1.4621135 | 0.003181336 | 0.0648359   | 1 |
| YIH_RESPONSE_TO_ARSENITE_C3                                               | 1.4620595 | 0.03787879  | 0.06476785  | 1 |
| MARTINEZ_RESPONSE_TO TRABECTEDIN_DN                                       | 1.4615114 | 0           | 0.06503308  | 1 |
| CORRE_MULTIPLE_MYELOMA_DN                                                 | 1.4602858 | 0.020023556 | 0.06583888  | 1 |
| REACTOME_PERK_REGULATES_GENE_EXPRESSION                                   | 1.4580514 | 0.024660913 | 0.06733699  | 1 |
| REACTOME_DISEASES_ASSOCIATED_WITH_N_GLYCOSYLATION_OF_PROTEINS             | 1.4549925 | 0.047169812 | 0.06939353  | 1 |
| REACTOME_DEPURINATION                                                     | 1.4546232 | 0.02117061  | 0.069584936 | 1 |
| DEMAGALHAES_AGING_DN                                                      | 1.4523764 | 0.058432937 | 0.07117745  | 1 |
| HILLION_HMGA1_TARGETS                                                     | 1.4514371 | 0.012222222 | 0.07177065  | 1 |
| KEGG_TERPENOID_BACKBONE_BIOSYNTHESIS                                      | 1.4509395 | 0.03342246  | 0.072088905 | 1 |
| WEBER_METHYLATED_IN_COLON_CANCER                                          | 1.4506309 | 0.038926173 | 0.07226873  | 1 |
| ENK_UV_RESPONSE_EPIDERMIS_UP                                              | 1.4501469 | 0           | 0.072536275 | 1 |
| PURBEY_TARGETS_OF_CTBP1_AND_SATB1_DN                                      | 1.4492091 | 0.001044932 | 0.073156886 | 1 |
| KORKOLA_YOLK_SAC_TUMOR_UP                                                 | 1.4490993 | 0.04845222  | 0.07312341  | 1 |
| REACTOME_RNA_POLYMERASE_III_TRANSCRIPTION_INITIATION_FROM_TYPE_1_PROMOTER | 1.4489716 | 0.044871796 | 0.07312609  | 1 |

|                                                            |           |             |             |   |
|------------------------------------------------------------|-----------|-------------|-------------|---|
| GOLUB_ALL_VS_AML_UP                                        | 1.4475582 | 0.033942558 | 0.074104965 | 1 |
| HWANG_PROSTATE_CANCER_MARKERS                              | 1.4472601 | 0.036082473 | 0.07422229  | 1 |
| YANG_BREAST_CANCER_ESR1_LASER_DN                           | 1.4472394 | 0.028901733 | 0.074127324 | 1 |
| REACTOME_STING_MEDIATED_INDUCION_OF_HOST_IMMUNE_RESPONSES  | 1.4468303 | 0.044       | 0.07435817  | 1 |
| KEGG_PHENYLALANINE_METABOLISM                              | 1.4463929 | 0.038873993 | 0.074575625 | 1 |
| REACTOME_SUMOYLATION_OF_CHROMATIN_ORGANIZATION_PROTEINS    | 1.4456564 | 0.021764033 | 0.075100906 | 1 |
| KEGG_GLYCINE_SERINE_AND_THREONINE_METABOLISM               | 1.4433929 | 0.027883397 | 0.07671393  | 1 |
| WANG_SMARCE1_TARGETS_DN                                    | 1.442483  | 0.001003009 | 0.07736633  | 1 |
| REACTOME_INTERLEUKIN_1_SIGNALING                           | 1.4415183 | 0.010822511 | 0.07804625  | 1 |
| RIZ_ERYTHROID_DIFFERENTIATION_HBZ                          | 1.440718  | 0.030674847 | 0.07857489  | 1 |
| REACTOME_COPI_DEPENDENT_GOLGI_TO_ER_RETROGRADE_TRANSPORT   | 1.4406258 | 0.010952903 | 0.07855396  | 1 |
| GRADE_COLON_VS_RECTAL_CANCER_UP                            | 1.4402617 | 0.03213844  | 0.07875673  | 1 |
| VANTVEER_BREAST_CANCER_BRCA1_UP                            | 1.4402412 | 0.02997602  | 0.078653455 | 1 |
| WU_HBX_TARGETS_2_UP                                        | 1.4375743 | 0.053108808 | 0.0807579   | 1 |
| VANHARANTA_UTERINE_FIBROID_WITH_7Q_DELETION_UP             | 1.436989  | 0.01918736  | 0.08110273  | 1 |
| REACTOME_POSITIVE_EPIGENETIC_REGULATION_OF_RRNA_EXPRESSION | 1.4346985 | 0.011402508 | 0.082941994 | 1 |
| KEGG_TRYPTOPHAN_METABOLISM                                 | 1.4339991 | 0.02955665  | 0.08342525  | 1 |

|                                                                          |           |             |             |   |
|--------------------------------------------------------------------------|-----------|-------------|-------------|---|
| YOKOE_CANCER_TESTIS_ANTIGENS                                             | 1.4334464 | 0.04071247  | 0.08381859  | 1 |
| REACTOME_NEURODEGENERATIVE_DISEASES                                      | 1.4334413 | 0.037711315 | 0.08370383  | 1 |
| BAKKER_FOXO3_TARGETS_DN                                                  | 1.4325367 | 0.003112033 | 0.084382676 | 1 |
| REACTOME_MITOCHONDRIAL_TRNA_AMINOACYLATION                               | 1.4324054 | 0.040843215 | 0.08438562  | 1 |
| NAM_FXYD5_TARGETS_DN                                                     | 1.4322685 | 0.06675749  | 0.08439261  | 1 |
| PYEON_CANCER_HEAD_AND_NECK_VS_CERVICAL_UP                                | 1.4317893 | 0           | 0.08467621  | 1 |
| GAJATE_RESPONSE_TO TRABECTEDIN_DN                                        | 1.4316132 | 0.044619422 | 0.0847248   | 1 |
| MELLMAN_TUT1_TARGETS_UP                                                  | 1.4310083 | 0.044619422 | 0.08514522  | 1 |
| BENPORATH_ES_CORE_NINE_CORRELATED                                        | 1.4308362 | 0.006622517 | 0.08516839  | 1 |
| REACTOME_SENESCENCE_ASSOCIATED_SECRETORY_PHENOTYP<br>E_SASP              | 1.4300975 | 0.016018307 | 0.08568977  | 1 |
| HOUSTIS_ROS                                                              | 1.4296106 | 0.037926674 | 0.08599578  | 1 |
| REACTOME_ERCC6_CSB_AND_EHMT2_G9A_POSITIVELY_REGUL<br>ATE_RRNA_EXPRESSION | 1.4293945 | 0.027577939 | 0.086050324 | 1 |
| GOTZMANN_EPITHELIAL_TO_MESENCHYMAL_TRANSITION_DN                         | 1.428526  | 0.00204918  | 0.08669499  | 1 |
| TOOKER_GEMCITABINE_RESISTANCE_DN                                         | 1.4279956 | 0.00955414  | 0.08702287  | 1 |
| ZHAN_MULTIPLE_MYELOMA_UP                                                 | 1.4255408 | 0.027027028 | 0.089085616 | 1 |
| SCHLOSSER_MYC_AND_SERUM_RESPONSE_SYNERGY                                 | 1.4254788 | 0.04136253  | 0.089004084 | 1 |
| REACTOME_DNA_DOUBLE_STRAND_BREAK_RESPONSE                                | 1.4253138 | 0.022196261 | 0.089027666 | 1 |
| GUO_HEX_TARGETS_DN                                                       | 1.4252279 | 0.01793722  | 0.08899271  | 1 |
| REACTOME_TCF_DEPENDENT_SIGNALING_IN_RESPONSE_TO_W                        | 1.4249144 | 0.001039501 | 0.08915807  | 1 |

|                                                                                             |           |             |             |   |
|---------------------------------------------------------------------------------------------|-----------|-------------|-------------|---|
| NT                                                                                          |           |             |             |   |
| MORI_SMALL_PRE_BII_LYMPHOCYTE_DN                                                            | 1.4231329 | 0.022573363 | 0.090616666 | 1 |
| VECCHI_GASTRIC_CANCER_ADVANCED_VS_EARLY_DN                                                  | 1.4222928 | 0.005399568 | 0.091263786 | 1 |
| REACTOME_PYRUVATE_METABOLISM                                                                | 1.4219459 | 0.041772153 | 0.09145034  | 1 |
| WEIGEL_OXIDATIVE_STRESS_BY_TBH_AND_H2O2                                                     | 1.4212892 | 0.04779874  | 0.09192574  | 1 |
| MCMURRAY_TP53_HRAS_COOPERATION_RESPONSE_UP                                                  | 1.4196438 | 0.04768041  | 0.09340155  | 1 |
| REACTOME_GENE_AND_PROTEIN_EXPRESSION_BY_JAK_STAT_SIGNALING_AFTER_INTERLEUKIN_12_STIMULATION | 1.4184625 | 0.04040404  | 0.094407156 | 1 |
| RUAN_RESPONSE_TO_TROGLITAZONE_DN                                                            | 1.417013  | 0.0665779   | 0.09566508  | 1 |
| RIZ_ERYTHROID_DIFFERENTIATION_CCNE1                                                         | 1.4168986 | 0.03897686  | 0.095631436 | 1 |
| WENG_POR_TARGETS_GLOBAL_UP                                                                  | 1.4164878 | 0.069986545 | 0.095885865 | 1 |
| OUELLET_CULTURED_OVARIAN_CANCER_INVASIVE_VS_LMP_UP                                          | 1.4161855 | 0.032657657 | 0.09605239  | 1 |
| TANAKA_METHYLATED_IN_ESOPHAGEAL_CARCINOMA                                                   | 1.4151005 | 0.015250545 | 0.09696175  | 1 |
| VANOEVELEN_MYOGENESIS_SIN3A_TARGETS                                                         | 1.4135365 | 0.001025641 | 0.098357804 | 1 |
| REACTOME_DISEASES_ASSOCIATED_WITH_GLYCOSYLATION_PRECURSOR_BIOSYNTHESIS                      | 1.4131423 | 0.05        | 0.09860819  | 1 |
| KANNAN_TP53_TARGETS_DN                                                                      | 1.4127736 | 0.055181697 | 0.0988292   | 1 |
| BYSTRYKH_HEMATOPOIESIS_STEM_CELL_AND_BRAIN_QTL_CIS                                          | 1.411825  | 0.019428572 | 0.09964092  | 1 |
| KAMIKUBO_MYELOID_CEBPA_NETWORK                                                              | 1.4116191 | 0.050931677 | 0.099736154 | 1 |
| KEGG_DRUG_METABOLISM_OTHER_ENZYMES                                                          | 1.4114912 | 0.045622688 | 0.09971122  | 1 |
| REACTOME_METABOLISM_OF_CARBOHYDRATES                                                        | 1.4109875 | 0           | 0.10007071  | 1 |

|                                                      |           |             |            |   |
|------------------------------------------------------|-----------|-------------|------------|---|
| DAZARD_RESPONSE_TO_UV_SCC_UP                         | 1.410353  | 0.015267176 | 0.1005539  | 1 |
| REACTOME_RNA_POLYMERASE_II_TRANSCRIBES_SNRNA_GENES   | 1.4098471 | 0.025669644 | 0.10096333 | 1 |
| REACTOME_CLASS_I_PEROXISOMAL_MEMBRANE_PROTEIN_IMPORT | 1.4095124 | 0.04611331  | 0.10113512 | 1 |
| NIKOLSKY_BREAST_CANCER_12Q24_AMPLICON                | 1.4094937 | 0.055934515 | 0.10101273 | 1 |
| WANG_ADIPOGENIC_GENES_REPRESSED_BY_SIRT1             | 1.4092413 | 0.042875156 | 0.10110707 | 1 |
| TARTE_PLASMA_CELL_VS_B_LYMPHOCYTE_UP                 | 1.408907  | 0.018202502 | 0.10131285 | 1 |
| AGUIRRE_PANCREATIC_CANCER_COPY_NUMBER_UP             | 1.4087484 | 0           | 0.10135311 | 1 |
| REACTOME_PTEN_REGULATION                             | 1.4084855 | 0.006256517 | 0.10146968 | 1 |
| REACTOME_HSF1_ACTIVATION                             | 1.4083171 | 0.05216285  | 0.10150178 | 1 |
| WEST_ADRENOCORTICAL_CARCINOMA_VS_ADENOMA_UP          | 1.4063891 | 0.060959794 | 0.10339091 | 1 |
| GUTIERREZ_MULTIPLE_MYELOMA_UP                        | 1.403002  | 0.05147059  | 0.10677353 | 1 |
| LEE_LIVER_CANCER_MYC_UP                              | 1.4026165 | 0.032902468 | 0.10702814 | 1 |
| DACOSTA_UV_RESPONSE_VIA_ERCC3_TTD_UP                 | 1.4020089 | 0.027939465 | 0.10754723 | 1 |
| REACTOME_SULFUR_AMINO_ACID_METABOLISM                | 1.4012543 | 0.049555272 | 0.10817839 | 1 |
| BURTON_ADIPOGENESIS_12                               | 1.3992344 | 0.057788946 | 0.11006532 | 1 |
| REACTOME_MICRORNA_MIRNA_BIOGENESIS                   | 1.3989497 | 0.062261753 | 0.11020456 | 1 |
| ZWANG_EGF_PERSISTENTLY_UP                            | 1.3988448 | 0.04534005  | 0.11015946 | 1 |
| REACTOME_RECRUITMENT_OF_NUMA_TO_MITOTIC_CENTROSOMES  | 1.3984159 | 0.015118791 | 0.11050606 | 1 |

|                                                         |           |             |             |   |
|---------------------------------------------------------|-----------|-------------|-------------|---|
| MCBRYAN_PUBERTAL_BREAST_6_7WK_DN                        | 1.3983619 | 0.02663707  | 0.11042817  | 1 |
| HUANG_GATA2_TARGETS_DN                                  | 1.3977509 | 0.02860286  | 0.110947534 | 1 |
| PID_SYNDECAN_1_PATHWAY                                  | 1.3969369 | 0.04074074  | 0.111640684 | 1 |
| VANDESLUIS_COMMD1_TARGETS_GROUP_3_UP                    | 1.3962528 | 0.020293122 | 0.11225778  | 1 |
| HSIAO_HOUSEKEEPING_GENES                                | 1.3956329 | 0           | 0.11279548  | 1 |
| DOANE_BREAST_CANCER_ESR1_DN                             | 1.395047  | 0.04676259  | 0.1132842   | 1 |
| KEGG_GLYCOLYSIS_GLUONEOGENESIS                          | 1.3950348 | 0.03291714  | 0.1131501   | 1 |
| BIOCARTA_ARF_PATHWAY                                    | 1.3944    | 0.07629428  | 0.113673255 | 1 |
| REACTOME_ACTIVATION_OF_HOX_GENES_DURING_DIFFERENTIATION | 1.3930602 | 0.023001095 | 0.11506751  | 1 |
| RUAN_RESPONSE_TO_TNF_TROGLITAZONE_DN                    | 1.3929216 | 0.040048543 | 0.11506102  | 1 |
| JIANG_HYPOXIA_VIA_VHL                                   | 1.3923252 | 0.06518905  | 0.115592256 | 1 |
| REACTOME_METABOLISM_OF_COFACTORS                        | 1.392091  | 0.06949807  | 0.11569536  | 1 |
| REACTOME_REGULATION_OF_EXPRESSION_OF_SLITS_AND_ROBO     | 1.391172  | 0.005235602 | 0.11655884  | 1 |
| COLLIS_PRKDC_REGULATORS                                 | 1.3906598 | 0.07783641  | 0.11698955  | 1 |
| REACTOME_SIRT1_NEGATIVELY_REGULATES_RRNA_EXPRESSION     | 1.3902982 | 0.049555272 | 0.117261335 | 1 |
| REACTOME_G1_PHASE                                       | 1.3901697 | 0.055555556 | 0.117261484 | 1 |
| AMIT_SERUM_RESPONSE_480_MCF10A                          | 1.3898154 | 0.048346058 | 0.11749946  | 1 |
| LIANG_HEMATOPOIESIS_STEM_CELL_NUMBER_SMALL_VS_HUG       | 1.3896606 | 0.03677343  | 0.11751609  | 1 |

|                                                                                                        |           |             |             |   |
|--------------------------------------------------------------------------------------------------------|-----------|-------------|-------------|---|
| E_UP                                                                                                   |           |             |             |   |
| HIRSCH_CELLULAR_TRANSFORMATION_SIGNATURE_DN                                                            | 1.3896312 | 0.021598272 | 0.117409386 | 1 |
| REACTOME_MRNA_DECAY_BY_5_TO_3_EXORIBONUCLEASE                                                          | 1.3894544 | 0.06887417  | 0.11746437  | 1 |
| KEGG_CYSTEINE_AND_METHIONINE_METABOLISM                                                                | 1.3892018 | 0.052955665 | 0.11757334  | 1 |
| SEMENZA_HIF1_TARGETS                                                                                   | 1.3873954 | 0.04400978  | 0.11940848  | 1 |
| PROVENZANI_METASTASIS_UP                                                                               | 1.3869172 | 0.006160164 | 0.11976634  | 1 |
| MARZEC_IL2_SIGNALING_UP                                                                                | 1.3849163 | 0.012944984 | 0.1218866   | 1 |
| GROSS_HIF1A_TARGETS_DN                                                                                 | 1.3843333 | 0.06887417  | 0.12238398  | 1 |
| REACTOME_CHOLESTEROL_BIOSYNTHESIS                                                                      | 1.3839241 | 0.054263566 | 0.122672714 | 1 |
| DEURIG_T_CELL_PROLYMPHOCTIC_LEUKEMIA_UP                                                                | 1.3827342 | 0.001008065 | 0.12391663  | 1 |
| KEGG_HISTIDINE_METABOLISM                                                                              | 1.3825774 | 0.061381076 | 0.12393698  | 1 |
| REACTOME_ACTIVATED_PKN1_STIMULATES_TRANSCRIPTION_OF_AR_ANDROGEN_RECEPTOR_REGULATED_GENES_KLK2_AND_KLK3 | 1.3821367 | 0.06163522  | 0.124282874 | 1 |
| DURCHDEWALD_SKIN_CARCINOGENESIS_UP                                                                     | 1.3804177 | 0.031076582 | 0.12606192  | 1 |
| LUI_TARGETS_OF_PAX8_PPARG_FUSION                                                                       | 1.3800279 | 0.07644883  | 0.12635343  | 1 |
| REACTOME_IRON_UPTAKE_AND_TRANSPORT                                                                     | 1.3768728 | 0.04806565  | 0.1298527   | 1 |
| OISHI_CHOLANGIOMA_STEM_CELL_LIKE_UP                                                                    | 1.3768666 | 0.001009082 | 0.12969828  | 1 |
| ELVIDGE_HIF1A_TARGETS_UP                                                                               | 1.3756737 | 0.03243848  | 0.13093132  | 1 |
| REACTOME_PROCESSING_OF_CAPPED_INTRONLESS_PRE_MRNA                                                      | 1.3754711 | 0.0524968   | 0.1310239   | 1 |
| REACTOME_COOPERATION_OF_PDCL_PHLP1_AND_TRIC_CCT_IN                                                     | 1.3753669 | 0.0495283   | 0.1309809   | 1 |

|                                                         |           |             |            |   |
|---------------------------------------------------------|-----------|-------------|------------|---|
| _G_PROTEIN_BETA_FOLDING                                 |           |             |            |   |
| REACTOME_MTOR_SIGNALLING                                | 1.3743448 | 0.04534314  | 0.13203236 | 1 |
| REACTOME_RNA_POLYMERASE_I_TRANSCRIPTION_INITIATION      | 1.3743188 | 0.053117782 | 0.13188984 | 1 |
| GROSS_HYPOXIA_VIA_ELK3_ONLY_DN                          | 1.3735358 | 0.049219687 | 0.13261159 | 1 |
| OHM_METHYLATED_IN_ADULT_CANCERS                         | 1.3730434 | 0.06709678  | 0.1330177  | 1 |
| BILD_MYC_ONCOGENIC_SIGNATURE                            | 1.3718766 | 0.004153687 | 0.13432688 | 1 |
| APRELIKOVA_BRCA1_TARGETS                                | 1.3702681 | 0.051869724 | 0.13610324 | 1 |
| NUNODA_RESPONSE_TO_DASATINIB_IMATINIB_UP                | 1.3698543 | 0.07026349  | 0.1364548  | 1 |
| COLDREN_GEFITINIB_RESISTANCE_UP                         | 1.369767  | 0.02183406  | 0.13640991 | 1 |
| KEGG_VIBRIO_CHOLERAE_INFECTION                          | 1.3697547 | 0.047180668 | 0.13625684 | 1 |
| DEN_INTERACT_WITH_LCA5                                  | 1.3682569 | 0.075351216 | 0.13793524 | 1 |
| SMITH_LIVER_CANCER                                      | 1.3674405 | 0.056009334 | 0.13881443 | 1 |
| WHITEHURST_PACLITAXEL_SENSITIVITY                       | 1.3670466 | 0.07371008  | 0.1391461  | 1 |
| SEIDEN_MET_SIGNALING                                    | 1.36658   | 0.08322497  | 0.13955787 | 1 |
| TURASHVILI_BREAST_LOBULAR_CARCINOMA_VS_LOBULAR_NORMA_DN | 1.3664843 | 0.037628278 | 0.13951392 | 1 |
| YAO_TEMPORAL_RESPONSE_TO_PROGESTERONE_CLUSTER_8         | 1.366343  | 0.046403714 | 0.13950965 | 1 |
| MODY_HIPPOCAMPUS_NEONATAL                               | 1.3659332 | 0.066332914 | 0.13986571 | 1 |
| BOUDOUKHA_BOUND_BY_IGF2BP2                              | 1.3655392 | 0.019438446 | 0.14017762 | 1 |
| RICKMAN_METASTASIS_UP                                   | 1.3653462 | 0.001008065 | 0.14023863 | 1 |
| ZHAN_EARLY_DIFFERENTIATION_GENES_DN                     | 1.3651874 | 0.057623047 | 0.14025946 | 1 |



|                                                  |           |             |            |   |
|--------------------------------------------------|-----------|-------------|------------|---|
| MORI_PLASMA_CELL_UP                              | 1.3637174 | 0.053550642 | 0.14195791 | 1 |
| REACTOME_BRANCHED_CHAIN_AMINO_ACID_CATABOLISM    | 1.3627104 | 0.075718015 | 0.14312574 | 1 |
| REACTOME_INTERLEUKIN_1_FAMILY_SIGNALING          | 1.3621836 | 0.017021276 | 0.14363341 | 1 |
| KEGG_GALACTOSE_METABOLISM                        | 1.361748  | 0.082914576 | 0.14401644 | 1 |
| REACTOME_DOWNSTREAM_TCR_SIGNALING                | 1.3606094 | 0.028571429 | 0.1453567  | 1 |
| BOYLAN_MULTIPLE_MYELOMA_C_D_UP                   | 1.3604661 | 0.014418126 | 0.14539582 | 1 |
| PID_MYC_PATHWAY                                  | 1.3596027 | 0.072916664 | 0.1463123  | 1 |
| ZAMORA_NOS2_TARGETS_DN                           | 1.3593155 | 0.03414097  | 0.14650889 | 1 |
| LEE_LIVER_CANCER_E2F1_DN                         | 1.3585389 | 0.05373832  | 0.14728512 | 1 |
| MCBRYAN_PUBERTAL_BREAST_4_5WK_DN                 | 1.3584474 | 0.007186858 | 0.1472195  | 1 |
| SMITH_TERT_TARGETS_UP                            | 1.3575696 | 0.01875     | 0.14819734 | 1 |
| REACTOME_FORMATION_OF_INCISION_COMPLEX_IN_GG_NER | 1.3560565 | 0.07305389  | 0.14998014 | 1 |
| KEGG_OTHER_GLYCAN_DEGRADATION                    | 1.3550801 | 0.10094213  | 0.15108618 | 1 |
| REACTOME_UB_SPECIFIC_PROCESSING_PROTEASES        | 1.354876  | 0.015527951 | 0.15116978 | 1 |
| BOYALT_LIVER_CANCER_SUBCLASS_G123_DN             | 1.3544773 | 0.056516726 | 0.1515343  | 1 |
| REACTOME_CLEC7A_DECTIN_1_SIGNALING               | 1.3544014 | 0.030270271 | 0.15144561 | 1 |
| REACTOME_RNA_POLYMERASE_III_TRANSCRIPTION        | 1.3523592 | 0.05910736  | 0.15403004 | 1 |
| HASLINGER_B_CLL_WITH_CHROMOSOME_12_TRISOMY       | 1.3513197 | 0.07105943  | 0.15526536 | 1 |
| ZHAN_V1_LATE_DIFFERENTIATION_GENES_DN            | 1.3512173 | 0.10135135  | 0.15523435 | 1 |
| REACTOME_HYALURONAN_METABOLISM                   | 1.3510911 | 0.111850865 | 0.15522777 | 1 |
| HAHTOLA_SEZARY_SYNDROM_UP                        | 1.3506973 | 0.045454547 | 0.15558209 | 1 |

|                                                           |           |             |            |   |
|-----------------------------------------------------------|-----------|-------------|------------|---|
| LANDIS_ERBB2_BREAST_TUMORS_324_UP                         | 1.3502722 | 0.01049318  | 0.155947   | 1 |
| KEGG_GLUTATHIONE_METABOLISM                               | 1.349413  | 0.06634499  | 0.15691513 | 1 |
| REACTOME_EPIGENETIC_REGULATION_OF_GENE_EXPRESSION         | 1.3489641 | 0.02459893  | 0.15733805 | 1 |
| FLOTHO_PEDIATRIC_ALL_THERAPY_RESPONSE_DN                  | 1.3480033 | 0.08312342  | 0.15847738 | 1 |
| JAZAERI_BREAST_CANCER_BRCA1_VS_BRCA2_UP                   | 1.3475956 | 0.070743404 | 0.15884563 | 1 |
| CAIRO_HEPATOBLASTOMA_UP                                   | 1.3471214 | 0.007106599 | 0.1593036  | 1 |
| NOUZOVA_TRETINOIN_AND_H4_ACETYLTATION                     | 1.3468117 | 0.021097047 | 0.15950619 | 1 |
| WOO_LIVER_CANCER_RECURRENCE_DN                            | 1.3467219 | 0.054114994 | 0.15944627 | 1 |
| LEE_CALORIE_RESTRICTION_MUSCLE_UP                         | 1.3449179 | 0.08262455  | 0.16182376 | 1 |
| KAAB_FAILED_HEART_VENTRICLE_DN                            | 1.344792  | 0.06666667  | 0.16182217 | 1 |
| FERNANDEZ_BOUND_BY_MYC                                    | 1.3447691 | 0.015625    | 0.1616679  | 1 |
| CHIN_BREAST_CANCER_COPY_NUMBER_UP                         | 1.343515  | 0.08481013  | 0.16323102 | 1 |
| SCHLOSSER_SERUM_RESPONSE_AUGMENTED_BY_MYC                 | 1.3431275 | 0.029978586 | 0.16356665 | 1 |
| REACTOME_GOLGI_TO_ER_RETROGRADE_TRANSPORT                 | 1.3421707 | 0.018907564 | 0.16472636 | 1 |
| HAHTOLA_CTCL_CUTANEOUS                                    | 1.3421094 | 0.08847185  | 0.16462322 | 1 |
| BOYLAN_MULTIPLE_MYELOMA_C_CLUSTER_UP                      | 1.3409076 | 0.05946602  | 0.16615205 | 1 |
| RUAN_RESPONSE_TO_TNF_DN                                   | 1.3407872 | 0.04793757  | 0.166125   | 1 |
| WEIGEL_OXIDATIVE_STRESS_RESPONSE                          | 1.3396018 | 0.08723135  | 0.167626   | 1 |
| MOREIRA_RESPONSE_TO_TSA_UP                                | 1.3380306 | 0.089420654 | 0.16968903 | 1 |
| KEGG_GLYCOSYLPHOSPHATIDYLINOSITOL_GPI_ANCHOR_BIOSYNTHESIS | 1.3375747 | 0.1042471   | 0.17012553 | 1 |

|                                                                                |           |             |            |   |
|--------------------------------------------------------------------------------|-----------|-------------|------------|---|
| REACTOME_TP53_REGULATES_METABOLIC_GENES                                        | 1.3365301 | 0.051591657 | 0.17145379 | 1 |
| REACTOME_FACTORS_INVOLVED_IN_MEGAKARYOCYTE_DEVELOPMENT_AND_PLATELET_PRODUCTION | 1.336027  | 0.02739726  | 0.17198746 | 1 |
| SYED ESTRADIOL_RESPONSE                                                        | 1.3355153 | 0.09549072  | 0.17250445 | 1 |
| MAGRANGEAS_MULTIPLE_MYELOMA_IGG_VS_IGA_DN                                      | 1.3354398 | 0.08962868  | 0.17240772 | 1 |
| BLALOCK_ALZHEIMERS_DISEASE_INCIPIENT_DN                                        | 1.3340906 | 0.020682523 | 0.17413902 | 1 |
| XU_GH1_AUTOCRINE_TARGETS_UP                                                    | 1.3323423 | 0.014447885 | 0.17645699 | 1 |
| REACTOME_INFLUENZA_INFECTION                                                   | 1.3309919 | 0.033862434 | 0.17832819 | 1 |
| TERAMOTO_OPN_TARGETS_CLUSTER_6                                                 | 1.3303236 | 0.0859375   | 0.17912355 | 1 |
| XU_CREBBP_TARGETS_UP                                                           | 1.3284104 | 0.116036505 | 0.18181959 | 1 |
| REACTOME_ADP_SIGNALLING_THROUGH_P2Y_PURINOCEPTOR_12                            | 1.328268  | 0.109643325 | 0.1818275  | 1 |
| MATZUK_SPERMATOCYTE                                                            | 1.3280247 | 0.049944505 | 0.18198209 | 1 |
| PARK_HSC_AND_MULTIPOTENT_PROGENITORS                                           | 1.3269379 | 0.081145585 | 0.18341105 | 1 |
| REACTOME_MHC_CLASS_II_ANTIGEN_PRESENTATION                                     | 1.3266926 | 0.037796978 | 0.18358879 | 1 |
| REACTOME_TRANSFERRIN_ENDOCYTOSIS_AND_RECYCLING                                 | 1.3249028 | 0.09564164  | 0.1861148  | 1 |
| VANDESLUIS_COMMD1_TARGETS_GROUP_4_DN                                           | 1.3239429 | 0.12955466  | 0.18735678 | 1 |
| SHIPP_DLBCL_CURED_VS_FATAL_DN                                                  | 1.3237425 | 0.08716707  | 0.18745247 | 1 |
| LEE_AGING_MUSCLE_DN                                                            | 1.3229607 | 0.09012346  | 0.18842146 | 1 |
| KORKOLA_EMBRYONAL_CARCINOMA_UP                                                 | 1.3226817 | 0.07080746  | 0.18867281 | 1 |
| BORLAK_LIVER_CANCER_EGF_UP                                                     | 1.3219784 | 0.059293043 | 0.18955898 | 1 |

|                                                                               |           |             |            |   |
|-------------------------------------------------------------------------------|-----------|-------------|------------|---|
| WIERENGA_PML_INTERACTOME                                                      | 1.3208187 | 0.09405941  | 0.19116324 | 1 |
| SHEPARD_CRUSH_AND_BURN_MUTANT_UP                                              | 1.3197651 | 0.01336074  | 0.19257268 | 1 |
| MARTORIATI_MDM4_TARGETS_FETAL_LIVER_UP                                        | 1.3196653 | 0.012282497 | 0.19251597 | 1 |
| REACTOME_SIALIC_ACID_METABOLISM                                               | 1.318813  | 0.09727626  | 0.19366345 | 1 |
| CAIRO_HEPATOBLASTOMA_POOR_SURVIVAL                                            | 1.3181251 | 0.11081081  | 0.19450714 | 1 |
| LIAO_METASTASIS                                                               | 1.3169417 | 0.001003009 | 0.19619206 | 1 |
| WEIGEL_OXIDATIVE_STRESS_BY_HNE_AND_H2O2                                       | 1.3169125 | 0.08262455  | 0.19601376 | 1 |
| REACTOME_RHO_GTPASES_ACTIVATE_PKNS                                            | 1.3166239 | 0.07403189  | 0.19621061 | 1 |
| CHENG_IMPRINTED_BY ESTRADIOL                                                  | 1.3157297 | 0.054884743 | 0.19736531 | 1 |
| LEIN_LOCALIZED_TO_PROXIMAL_DENDRITES                                          | 1.3152407 | 0.08856089  | 0.19795379 | 1 |
| FARMER_BREAST_CANCER_BASAL_VS_LUMLINAL                                        | 1.3148491 | 0.002022245 | 0.19835101 | 1 |
| ELVIDGE_HIF1A_AND_HIF2A_TARGETS_UP                                            | 1.3148422 | 0.088709675 | 0.19813761 | 1 |
| MATSUDA_NATURAL_KILLER_DIFFERENTIATION                                        | 1.3148178 | 0.001001001 | 0.19795254 | 1 |
| FONTAINE_FOLLICULAR_THYROID_ADENOMA_DN                                        | 1.3146565 | 0.06666667  | 0.19797891 | 1 |
| REACTOME_RNA_POLYMERASE_III_TRANSCRIPTION_INITIATION<br>_FROM_TYPE_3_PROMOTER | 1.3140167 | 0.1126408   | 0.19877516 | 1 |
| REACTOME_SIGNALING_BY_FGFR2_IN_DISEASE                                        | 1.3124772 | 0.08888889  | 0.20111252 | 1 |
| ZHAN_MULTIPLE_MYELOMA_CD1_VS_CD2_UP                                           | 1.3123666 | 0.06682028  | 0.20108609 | 1 |
| FAELT_B_CLL_WITH_VH3_21_UP                                                    | 1.3120985 | 0.09540636  | 0.2013302  | 1 |
| LEE_LIVER_CANCER_CIPROFIBRATE_UP                                              | 1.3116838 | 0.07932961  | 0.20176327 | 1 |
| SMITH_TERT_TARGETS_DN                                                         | 1.3116206 | 0.06394708  | 0.20163079 | 1 |

|                                                                    |           |             |            |   |
|--------------------------------------------------------------------|-----------|-------------|------------|---|
| LAMB_CCND1_TARGETS                                                 | 1.3110963 | 0.1255116   | 0.20224962 | 1 |
| REACTOME_DEFECTS_IN_VITAMIN_AND_COFACTOR_METABOLISM                | 1.310795  | 0.112840466 | 0.20252997 | 1 |
| WANG_RESPONSE_TO_BEXAROTENE_UP                                     | 1.3105707 | 0.086419754 | 0.20266797 | 1 |
| REACTOME_ASPARAGINE_N_LINKED_GLYCOSYLATION                         | 1.310569  | 0.007042253 | 0.20244618 | 1 |
| MACLACHLAN_BRCA1_TARGETS_UP                                        | 1.3095354 | 0.12763157  | 0.20391127 | 1 |
| LUI_THYROID_CANCER_PAX8_PPARG_DN                                   | 1.3094763 | 0.10071942  | 0.20380053 | 1 |
| WELCH_GATA1_TARGETS                                                | 1.30925   | 0.11932555  | 0.20397224 | 1 |
| REACTOME_FORMATION_OF_THE_BETA_CATENIN:TCF_TRANSACTIVATING_COMPLEX | 1.3091805 | 0.092289716 | 0.20386817 | 1 |
| APPEL_IMATINIB_RESPONSE                                            | 1.3090895 | 0.10406091  | 0.20378609 | 1 |
| LOCKWOOD_AMPLIFIED_IN_LUNG_CANCER                                  | 1.3078815 | 0.017525773 | 0.2055952  | 1 |
| REACTOME_SUMOYLATION                                               | 1.3078482 | 0.026288118 | 0.20543286 | 1 |
| REACTOME_METABOLISM_OF_WATER_SOLUBLE_VITAMINS_AND_COFACTORS        | 1.3056672 | 0.04812834  | 0.2088429  | 1 |
| YAO_TEMPORAL_RESPONSE_TO_PROGESTERONE_CLUSTER_4                    | 1.3053147 | 0.1302578   | 0.20916937 | 1 |
| NIKOLSKY_BREAST_CANCER_7P22_AMPLICON                               | 1.3051429 | 0.10827251  | 0.20922105 | 1 |
| PID_TELOMERASE_PATHWAY                                             | 1.3047022 | 0.06494961  | 0.20972607 | 1 |
| NAKAMURA_ADIPOGENESIS_LATE_DN                                      | 1.3023514 | 0.10436893  | 0.21351977 | 1 |
| DARWICHE_PAPILLOMA_RISK_LOW_UP                                     | 1.3021312 | 0.03125     | 0.21364689 | 1 |
| NIKOLSKY_BREAST_CANCER_17Q11_Q21_AMPLICON                          | 1.3002589 | 0.049409237 | 0.21664459 | 1 |

|                                                       |           |             |            |   |
|-------------------------------------------------------|-----------|-------------|------------|---|
| FOSTER_KDM1A_TARGETS_DN                               | 1.3001764 | 0.026831785 | 0.21654847 | 1 |
| KANG_AR_TARGETS_UP                                    | 1.2990447 | 0.1316129   | 0.21820796 | 1 |
| POMEROY_MEDULLOBLASTOMA_DESMOPLASIC_VS_CLASSIC_UP     | 1.2982173 | 0.081986144 | 0.21945672 | 1 |
| NELSON_RESPONSE_TO_ANDROGEN_DN                        | 1.2981896 | 0.13580246  | 0.21926287 | 1 |
| GUENTHER_GROWTH_SPHERICAL_VS_ADHERENT_UP              | 1.298168  | 0.12980132  | 0.21906152 | 1 |
| REACTOME_TRANSCRIPTIONAL_REGULATION_OF_GRANULOPOIESIS | 1.2970418 | 0.09396752  | 0.22075634 | 1 |
| KEGG_STEROID_BIOSYNTHESIS                             | 1.2964628 | 0.13066667  | 0.22154024 | 1 |
| SAKAI_CHRONIC_HEPATITIS_VS_LIVER_CANCER_UP            | 1.2963506 | 0.0676275   | 0.22150122 | 1 |
| REACTOME_METABOLISM_OF_VITAMINS_AND_COFACTORS         | 1.2959033 | 0.02371134  | 0.22201078 | 1 |
| WOOD_EBV_EBNA1_TARGETS_UP                             | 1.295639  | 0.056277055 | 0.22223808 | 1 |
| LANDIS_ERBB2_BREAST_PRENEOPLASTIC_UP                  | 1.2954787 | 0.1380697   | 0.2222838  | 1 |
| LIU_COMMON_CANCER_GENES                               | 1.2943952 | 0.10116279  | 0.22389337 | 1 |
| WELCSH_BRCA1_TARGETS_UP                               | 1.2937297 | 0.031729784 | 0.22484006 | 1 |
| STAMBOLSKY_BOUND_BY_MUTATED_TP53                      | 1.2934538 | 0.123324394 | 0.22508834 | 1 |
| RAMPON_ENRICHED_LEARNING_ENVIRONMENT_LATE_UP          | 1.2932392 | 0.1368421   | 0.22524208 | 1 |
| KRIEG_KDM3A_TARGETS_NOT_HYPOXIA                       | 1.2926023 | 0.03409091  | 0.22613908 | 1 |
| LAIHO_COLORECTAL_CANCER_SERRATED_UP                   | 1.2922785 | 0.043991417 | 0.22641478 | 1 |
| SHETH_LIVER_CANCER_VS_TXNIP_LOSS_PAM4                 | 1.2918358 | 0.015197569 | 0.22697605 | 1 |
| REACTOME_FORMATION_OF_TUBULIN_FOLDING_INTERMEDIAT     | 1.2900872 | 0.12565444  | 0.22990441 | 1 |

|                                                                    |           |             |            |   |
|--------------------------------------------------------------------|-----------|-------------|------------|---|
| ES_BY_CCT_TRIC                                                     |           |             |            |   |
| BIOCARTA_ERAD_PATHWAY                                              | 1.2894205 | 0.12214765  | 0.23090002 | 1 |
| VILLANUEVA_LIVER_CANCER_KRT19_DN                                   | 1.288975  | 0.08661418  | 0.23142344 | 1 |
| REACTOME_SCAVENGING_BY_CLASS_A_RECEPTORS                           | 1.2887498 | 0.13084112  | 0.2315963  | 1 |
| KEGG_BETA_ALANINE_METABOLISM                                       | 1.2864007 | 0.140625    | 0.23562522 | 1 |
| MARIADASON_RESPONSE_TO_CURCUMIN_SULINDAC_5                         | 1.2860522 | 0.1387808   | 0.2359792  | 1 |
| MARCINIAK_ER_STRESS_RESPONSE_VIA_CHOP                              | 1.2853428 | 0.12919897  | 0.23703738 | 1 |
| ABE_VEGFA_TARGETS                                                  | 1.2851892 | 0.14401077  | 0.2370694  | 1 |
| TOMLINS_PROSTATE_CANCER_UP                                         | 1.2844254 | 0.113553114 | 0.23831613 | 1 |
| TAYLOR_METHYLATED_IN_ACUTE_LYMPHOBLASTIC_LEUKEMIA                  | 1.2840625 | 0.081018515 | 0.23874222 | 1 |
| WAKABAYASHI_ADIPOGENESIS_PPARG_BOUND_36HR                          | 1.2837846 | 0.12562189  | 0.23898555 | 1 |
| ACEVEDO_LIVER_CANCER_WITH_H3K9ME3_DN                               | 1.2837045 | 0.0636663   | 0.23886772 | 1 |
| DACOSTA_UV_RESPONSE_VIA_ERCC3_UP                                   | 1.2836959 | 0.01711984  | 0.23862101 | 1 |
| REACTOME_ANTIGEN_PROCESSING:_UBIQUITINATION_PROTEASOME_DEGRADATION | 1.2811526 | 0.013091642 | 0.24310295 | 1 |
| KEGG_BASAL_TRANSCRIPTION_FACTORS                                   | 1.2803622 | 0.11111111  | 0.24439366 | 1 |
| KIM_WT1_TARGETS_12HR_DN                                            | 1.280332  | 0.025614753 | 0.24417548 | 1 |
| MMS_MOUSE_LYMPH_HIGH_4HRS_UP                                       | 1.2792927 | 0.0996264   | 0.24598892 | 1 |
| ENK_UV_RESPONSE_KERATINOCYTE_DN                                    | 1.2787288 | 0.005005005 | 0.2468248  | 1 |
| KYNG_RESPONSE_TO_H2O2_VIA_ERCC6_DN                                 | 1.278583  | 0.11030303  | 0.24683955 | 1 |
| JAZAG_TGFB1_SIGNALING_UP                                           | 1.277585  | 0.066521265 | 0.24848625 | 1 |

|                                                                                                             |            |                  |                  |                   |
|-------------------------------------------------------------------------------------------------------------|------------|------------------|------------------|-------------------|
| BIOCARTA_NO1_PATHWAY                                                                                        | 1.2773719  | 0.13520408       | 0.24861906       | 1                 |
| RIZKI_TUMOR_INVASIVENESS_3D_DN                                                                              | 1.2772452  | 0.034517765      | 0.2485756        | 1                 |
| <b><i>p53</i><sup>-/-</sup> V-Fus CD4 naïve T cells vs WT CD4 naïve T cells at non-tumor bearing status</b> | <b>NES</b> | <b>NOM p-val</b> | <b>FDR q-val</b> | <b>FWER p-val</b> |
| BROWNE_INTERFERON_RESPONSIVE_GENES                                                                          | 2.721451   | 0                | 0                | 0                 |
| BOSCO_INTERFERON_INDUCED_ANTIVIRAL_MODULE                                                                   | 2.6463692  | 0                | 0                | 0                 |
| SANA_RESPONSE_TO_IFNG_UP                                                                                    | 2.6163497  | 0                | 0                | 0                 |
| HECKER_IFNB1_TARGETS                                                                                        | 2.607474   | 0                | 0                | 0                 |
| ICHIBA_GRAFT_VERSUS_HOST_DISEASE_D7_UP                                                                      | 2.5636215  | 0                | 0                | 0                 |
| BENNETT_SYSTEMIC_LUPUS_ERYTHEMATOSUS                                                                        | 2.5298376  | 0                | 0                | 0                 |
| MOSERLE_IFNA_RESPONSE                                                                                       | 2.527623   | 0                | 0                | 0                 |
| BOYLAN_MULTIPLE_MYELOMA_PCA1_UP                                                                             | 2.4860706  | 0                | 0                | 0                 |
| MARKEY_RB1_ACUTE_LOF_DN                                                                                     | 2.4685166  | 0                | 0                | 0                 |
| REACTOME_INTERFERON_ALPHA_BETA_SIGNALING                                                                    | 2.4519846  | 0                | 0                | 0                 |
| TAKEDA_TARGETS_OF_NUP98_HOXA9_FUSION_3D_UP                                                                  | 2.4372962  | 0                | 0                | 0                 |
| GOLDRATH_ANTIGEN_RESPONSE                                                                                   | 2.4048588  | 0                | 0                | 0                 |
| WUNDER_INFLAMMATORY_RESPONSE_AND_CHOLESTEROL_UP                                                             | 2.3588724  | 0                | 0                | 0                 |
| GAVIN_FOXP3_TARGETS_CLUSTER_P6                                                                              | 2.3531559  | 0                | 0                | 0                 |
| REACTOME_INTERFERON_GAMMA_SIGNALING                                                                         | 2.3422148  | 0                | 0                | 0                 |
| KIM_GLIS2_TARGETS_UP                                                                                        | 2.33705    | 0                | 0                | 0                 |
| KRASNOSELSKAYA_ILF3_TARGETS_UP                                                                              | 2.3227305  | 0                | 0                | 0                 |



|                                                    |           |   |          |       |
|----------------------------------------------------|-----------|---|----------|-------|
| LIAN_LIPA_TARGETS_6M                               | 2.3086917 | 0 | 0        | 0     |
| UROSEVIC_RESPONSE_TO_IMIQUIMOD                     | 2.2983854 | 0 | 0        | 0     |
| GRAESSMANN_RESPONSE_TO_MC_AND_SERUM_DEPRIVATION_UP | 2.275479  | 0 | 4.41E-05 | 0.001 |
| KLEIN_PRIMARY EFFUSION_LYMPHOMA_DN                 | 2.2594383 | 0 | 4.20E-05 | 0.001 |
| TAKEDA_TARGETS_OF_NUP98_HOXA9_FUSION_16D_UP        | 2.2589498 | 0 | 4.01E-05 | 0.001 |
| HOFFMANN_SMALL_PRE_BII_TO_IMMATURE_B_LYMPHOCYTE_UP | 2.2575    | 0 | 3.84E-05 | 0.001 |
| LIAN_LIPA_TARGETS_3M                               | 2.254935  | 0 | 3.68E-05 | 0.001 |
| FARMER_BREAST_CANCER_CLUSTER_1                     | 2.2282734 | 0 | 7.02E-05 | 0.002 |
| MCLACHLAN_DENTAL_CARIES_UP                         | 2.2266681 | 0 | 6.75E-05 | 0.002 |
| LIU_VAV3_PROSTATE_CARCINOGENESIS_UP                | 2.2164314 | 0 | 1.93E-04 | 0.006 |
| ZHANG_INTERFERON_RESPONSE                          | 2.177546  | 0 | 2.77E-04 | 0.009 |
| YAN_ESCAPE_FROM_ANOIKIS                            | 2.1771367 | 0 | 2.68E-04 | 0.009 |
| TAKEDA_TARGETS_OF_NUP98_HOXA9_FUSION_10D_UP        | 2.1754768 | 0 | 2.59E-04 | 0.009 |
| EINAV_INTERFERON_SIGNATURE_IN_CANCER               | 2.1688135 | 0 | 3.05E-04 | 0.011 |
| MAEKAWA_ATF2_TARGETS                               | 2.1570828 | 0 | 3.76E-04 | 0.014 |
| DAUER_STAT3_TARGETS_DN                             | 2.151782  | 0 | 3.91E-04 | 0.015 |
| WIELAND_UP_BY_HBV_INFECTION                        | 2.1516752 | 0 | 3.79E-04 | 0.015 |
| MORI_LARGE_PRE_BII_LYMPHOCYTE_DN                   | 2.146309  | 0 | 3.93E-04 | 0.016 |
| LIANG_SILENCED_BY_METHYLATION_2                    | 2.1431558 | 0 | 4.30E-04 | 0.018 |

|                                                    |           |   |             |       |
|----------------------------------------------------|-----------|---|-------------|-------|
| BAUS_TFF2_TARGETS_UP                               | 2.1304638 | 0 | 5.11E-04    | 0.022 |
| CADWELL_ATG16L1_TARGETS_UP                         | 2.12703   | 0 | 5.66E-04    | 0.025 |
| PLASARI_TGFB1_TARGETS_10HR_DN                      | 2.1075313 | 0 | 8.83E-04    | 0.04  |
| REACTOME_INTERFERON_SIGNALING                      | 2.0933769 | 0 | 0.001120407 | 0.052 |
| TAKEDA_TARGETS_OF_NUP98_HOXA9_FUSION_8D_UP         | 2.08158   | 0 | 0.001323427 | 0.063 |
| MORI_IMMATURE_B_LYMPHOCYTE_UP                      | 2.0781353 | 0 | 0.001333039 | 0.065 |
| SHIN_B_CELL_LYMPHOMA_CLUSTER_9                     | 2.061712  | 0 | 0.00173931  | 0.084 |
| ZHANG_ANTIVIRAL_RESPONSE_TO_RIBAVIRIN_UP           | 2.0543427 | 0 | 0.001758068 | 0.087 |
| BOSCO_TH1_CYTOTOXIC_MODULE                         | 2.0501611 | 0 | 0.001890884 | 0.095 |
| KEGG_TYPE_I_DIABETES_MELLITUS                      | 2.0497863 | 0 | 0.001887006 | 0.097 |
| VANASSE_BCL2_TARGETS_DN                            | 2.0203419 | 0 | 0.003020487 | 0.153 |
| JECHLINGER_EPITHELIAL_TO_MESENCHYMAL_TRANSITION_UP | 2.0180414 | 0 | 0.003029637 | 0.156 |
| HELLER_SILENCED_BY_METHYLATION_UP                  | 2.0096393 | 0 | 0.003371075 | 0.178 |
| BOYLAN_MULTIPLE_MYELOMA_D_DN                       | 2.0049827 | 0 | 0.003666129 | 0.191 |
| ICHIBA_GRAFT_VERSUS_HOST_DISEASE_35D_UP            | 2.001431  | 0 | 0.003850458 | 0.204 |
| CROONQUIST_NRAS_SIGNALING_UP                       | 1.9870669 | 0 | 0.004736831 | 0.25  |
| ZHAN_MULTIPLE_MYELOMA_LB_DN                        | 1.9817283 | 0 | 0.004906705 | 0.261 |
| ZHAN_MULTIPLE_MYELOMA_PR_UP                        | 1.9805466 | 0 | 0.00487902  | 0.263 |
| FLORIO_NEOCORTEX_BASAL_RADIAL_GLIA_DN              | 1.96596   | 0 | 0.00609451  | 0.32  |
| GAURNIER_PSMD4_TARGETS                             | 1.9623002 | 0 | 0.006367714 | 0.339 |
| GAVIN_IL2_RESPONSIVE_FOXP3_TARGETS_UP              | 1.9606321 | 0 | 0.006406881 | 0.347 |

|                                                  |           |             |             |       |
|--------------------------------------------------|-----------|-------------|-------------|-------|
| STEARMAN_TUMOR_FIELD_EFFECT_UP                   | 1.9600813 | 0.003944773 | 0.0063858   | 0.351 |
| GAVIN_PDE3B_TARGETS                              | 1.9579961 | 0.001953125 | 0.006410098 | 0.353 |
| NAKAYAMA_SOFT_TISSUE_TUMORS_PCA1_UP              | 1.9570189 | 0           | 0.006405331 | 0.358 |
| APPEL_IMATINIB_RESPONSE                          | 1.954013  | 0           | 0.006737313 | 0.375 |
| GAVIN_FOXP3_TARGETS_CLUSTER_T4                   | 1.9490043 | 0           | 0.007253366 | 0.407 |
| STAMBOLSKY_TARGETS_OF_MUTATED_TP53_DN            | 1.9383173 | 0           | 0.007984743 | 0.439 |
| KLEIN_TARGETS_OF_BCR_ABL1_FUSION                 | 1.9365014 | 0           | 0.008141121 | 0.452 |
| REACTOME_OLFACTORY_SIGNALING_PATHWAY             | 1.9354873 | 0           | 0.008082676 | 0.455 |
| KEGG_ALLOGRAFT_REJECTION                         | 1.9287807 | 0.001937985 | 0.008716852 | 0.486 |
| RUAN_RESPONSE_TO_TNF_TROGLITAZONE_UP             | 1.9238755 | 0.00204499  | 0.009216231 | 0.504 |
| SANA_TNF_SIGNALING_UP                            | 1.9169403 | 0           | 0.00991653  | 0.542 |
| POOLA_INVASIVE_BREAST_CANCER_UP                  | 1.9088033 | 0           | 0.011008031 | 0.581 |
| WALLACE_PROSTATE_CANCER_RACE_UP                  | 1.9029245 | 0           | 0.011566062 | 0.605 |
| KIM_LRRC3B_TARGETS                               | 1.8999126 | 0.002       | 0.011865896 | 0.618 |
| KEGG_GRAFT_VERSUS_HOST_DISEASE                   | 1.8976804 | 0.003831418 | 0.012059054 | 0.629 |
| REACTOME_TNFS_BIND_THEIR_PHYSIOLOGICAL_RECEPTORS | 1.8975279 | 0           | 0.01190593  | 0.629 |
| HOLLERN_SOLID_NODULAR_BREAST_TUMOR_DN            | 1.896008  | 0           | 0.012057982 | 0.641 |
| REACTOME_ANTIMICROBIAL_PEPTIDES                  | 1.8938165 | 0.001968504 | 0.012172398 | 0.652 |
| FURUKAWA_DUSP6_TARGETS_PCI35_UP                  | 1.8936082 | 0           | 0.012045963 | 0.652 |
| WILENSKY_RESPONSE_TO_DARAPLADIB                  | 1.8860397 | 0           | 0.013143505 | 0.688 |
| GAUSSMANN_MLL_AF4_FUSION_TARGETS_B_UP            | 1.8827441 | 0           | 0.013549948 | 0.704 |

|                                                                                   |           |             |             |       |
|-----------------------------------------------------------------------------------|-----------|-------------|-------------|-------|
| KAMIKUBO_MYELOID_CEBPA_NETWORK                                                    | 1.8696866 | 0           | 0.015945217 | 0.758 |
| REACTOME_IMMUNOREGULATORY_INTERACTIONS_BETWEEN_A_LYMPHOID_AND_A_NON_LYMPHOID_CELL | 1.8690003 | 0           | 0.015842495 | 0.759 |
| ZHENG_IL22_SIGNALING_UP                                                           | 1.8582451 | 0           | 0.018019266 | 0.807 |
| MIKKELSEN_IPS_WITH_HCP_H3K27ME3                                                   | 1.8538721 | 0.002070393 | 0.018829966 | 0.824 |
| RADAEVA_RESPONSE_TO_IFNA1_UP                                                      | 1.851335  | 0           | 0.019234892 | 0.833 |
| KEGG_AUTOIMMUNE_THYROID_DISEASE                                                   | 1.8445666 | 0           | 0.020644365 | 0.855 |
| DER_IFN_ALPHA_RESPONSE_UP                                                         | 1.8422979 | 0           | 0.021070015 | 0.865 |
| GAVIN_FOXP3_TARGETS_CLUSTER_P3                                                    | 1.8385504 | 0           | 0.021593792 | 0.875 |
| BOYLAN_MULTIPLE_MYELOMA_C_D_DN                                                    | 1.8374437 | 0           | 0.021543806 | 0.879 |
| GRAHAM_CML QUIESCENT VS NORMAL QUIESCENT_DN                                       | 1.8282762 | 0.001930502 | 0.023599274 | 0.908 |
| BASSO_CD40_SIGNALING_UP                                                           | 1.8275243 | 0           | 0.023507556 | 0.908 |
| QI_PLASMACYTOMA_UP                                                                | 1.8269231 | 0           | 0.023370648 | 0.909 |
| KANG_DOXORUBICIN_RESISTANCE_UP                                                    | 1.8256017 | 0           | 0.023482537 | 0.913 |
| BERTUCCI_MEDULLARY_VS_DUCTAL_BREAST_CANCER_UP                                     | 1.8248806 | 0           | 0.023432463 | 0.918 |
| KUROZUMI_RESPONSE_TO_ONCOCYTIC_VIRUS                                              | 1.8241271 | 0           | 0.023477834 | 0.92  |
| HAHTOLA_SEZARY_SYNDROM_DN                                                         | 1.8221586 | 0.00390625  | 0.023804126 | 0.928 |
| BOYLAN_MULTIPLE_MYELOMA_PCA3_DN                                                   | 1.8200532 | 0.001934236 | 0.024035577 | 0.93  |
| LEE_LIVER_CANCER_MYC_E2F1_UP                                                      | 1.8196653 | 0.004149378 | 0.023883408 | 0.93  |
| GREENBAUM_E2A_TARGETS_DN                                                          | 1.8131071 | 0.003952569 | 0.025183799 | 0.943 |
| LI_WILMS_TUMOR_ANAPLASTIC_UP                                                      | 1.8105294 | 0.006       | 0.025700813 | 0.948 |

|                                                       |           |             |             |       |
|-------------------------------------------------------|-----------|-------------|-------------|-------|
| GENTLES_LEUKEMIC_STEM_CELL_UP                         | 1.8046745 | 0.00189394  | 0.027139137 | 0.958 |
| SEITZ NEOPLASTIC_TRANSFORMATION_BY_8P_DELETION_UP     | 1.8039767 | 0.00203252  | 0.027090387 | 0.961 |
| KEGG_ANTIGEN_PROCESSING_AND_PRESENTATION              | 1.8023436 | 0.001964637 | 0.027241101 | 0.964 |
| COLINA_TARGETS_OF_4EBP1_AND_4EBP2                     | 1.7966243 | 0           | 0.028652849 | 0.971 |
| PID_IL27_PATHWAY                                      | 1.7962662 | 0.003802281 | 0.02843315  | 0.971 |
| KEGG_CYTOKINE_CYTOKINE_RECEPTOR_INTERACTION           | 1.7942992 | 0           | 0.028771851 | 0.974 |
| VILIMAS_NOTCH1_TARGETS_DN                             | 1.793791  | 0.00203252  | 0.028679274 | 0.975 |
| TARTE_PLASMA_CELL_VS_B_LYMPHOCYTE_DN                  | 1.7928523 | 0           | 0.02867647  | 0.976 |
| VERRECCHIA_RESPONSE_TO_TGFB1_C1                       | 1.7920362 | 0.007662835 | 0.028650217 | 0.978 |
| KIM_ALL_DISORDERS_CALB1_CORR_DN                       | 1.7880522 | 0.001976285 | 0.029489856 | 0.982 |
| PID_IL23_PATHWAY                                      | 1.7833557 | 0           | 0.030553319 | 0.984 |
| DER_IFN_BETA_RESPONSE_UP                              | 1.7722557 | 0.001926782 | 0.034055635 | 0.988 |
| KEGG_ASTHMA                                           | 1.770625  | 0.008016032 | 0.034315016 | 0.988 |
| NAKAJIMA_MAST_CELL                                    | 1.7615378 | 0.008097166 | 0.03729582  | 0.993 |
| YU_MYC_TARGETS_DN                                     | 1.7608477 | 0           | 0.037326075 | 0.993 |
| SHARMA_PILOCYTIC_ASTROCYTOMA_LOCATION_UP              | 1.7581947 | 0.00408998  | 0.038011245 | 0.993 |
| ABBUD_LIF_SIGNALING_1_DN                              | 1.7525579 | 0.005836576 | 0.040072266 | 0.995 |
| WORSCHER_TUMOR_REJECTION_UP                           | 1.7505296 | 0           | 0.040600993 | 0.995 |
| KIM_MYC_AMPLIFICATION_TARGETS_DN                      | 1.7495356 | 0           | 0.040629584 | 0.997 |
| ALTEMEIER_RESPONSE_TO_LPS_WITH_MECHANICAL_VENTILATION | 1.7469877 | 0           | 0.041330386 | 0.998 |

|                                             |           |             |             |       |
|---------------------------------------------|-----------|-------------|-------------|-------|
| DER_IFN_GAMMA_RESPONSE_UP                   | 1.7391404 | 0.001919386 | 0.044542283 | 0.999 |
| NOJIMA_SFRP2_TARGETS_DN                     | 1.738827  | 0.005780347 | 0.044292804 | 0.999 |
| SAMOLS_TARGETS_OF_KHSV_MIRNAS_DN            | 1.7256515 | 0.001919386 | 0.050000813 | 1     |
| GOLDRATH_IMMUNE_MEMORY                      | 1.7251215 | 0.002004008 | 0.049837235 | 1     |
| GAL_LEUKEMIC_STEM_CELL_DN                   | 1.720317  | 0           | 0.05205291  | 1     |
| BOYALT_LIVER_CANCER_SUBCLASS_G5_DN          | 1.7191123 | 0.002       | 0.0522991   | 1     |
| CHIANG_LIVER_CANCER_SUBCLASS_INTERFERON_UP  | 1.7183875 | 0.011673152 | 0.052300792 | 1     |
| HANN_RESISTANCE_TO_BCL2_INHIBITOR_UP        | 1.7182022 | 0.01004016  | 0.051960897 | 1     |
| MORI_MATURE_B_LYMPHOCYTE_UP                 | 1.7153314 | 0.002008032 | 0.053219497 | 1     |
| RASHI_RESPONSE_TO_IONIZING_RADIATION_6      | 1.7004489 | 0           | 0.060491193 | 1     |
| ZHAN_MULTIPLE_MYELOMA_DN                    | 1.6950217 | 0.004040404 | 0.063040465 | 1     |
| RODWELL_AGING_KIDNEY_UP                     | 1.6937995 | 0           | 0.06327082  | 1     |
| KEGG_CELL_ADHESION_MOLECULES_CAMS           | 1.693147  | 0.001941748 | 0.063109756 | 1     |
| MORI_PLASMA_CELL_DN                         | 1.6894119 | 0.003960396 | 0.0647592   | 1     |
| WANG_NFKB_TARGETS                           | 1.687932  | 0.016260162 | 0.06520437  | 1     |
| ROSTY_CERVICAL_CANCER_PROLIFERATION_CLUSTER | 1.6826415 | 0           | 0.0679281   | 1     |
| REACTOME_INTERLEUKIN_10_SIGNALING           | 1.6819372 | 0.011976048 | 0.06789207  | 1     |
| ROSS_AML_WITH_MLL_FUSIONS                   | 1.6802971 | 0           | 0.06845994  | 1     |
| GRAHAM_CML_DIVIDING_VS_NORMAL_QUIESCENT_UP  | 1.677752  | 0           | 0.06938136  | 1     |
| FLORIO_NEOCORTEX_BASAL_RADIAL_GLIA_UP       | 1.6765192 | 0           | 0.0697459   | 1     |
| ZHAN_MULTIPLE_MYELOMA_CD2_UP                | 1.673815  | 0.008368201 | 0.0710157   | 1     |

|                                                                                           |           |             |             |   |
|-------------------------------------------------------------------------------------------|-----------|-------------|-------------|---|
| NAKAYAMA_SOFT_TISSUE_TUMORS_PCA2_UP                                                       | 1.6726347 | 0.001901141 | 0.0712974   | 1 |
| LEE_AGING_CEREBELLUM_UP                                                                   | 1.6724845 | 0.00407332  | 0.070828505 | 1 |
| SCIEN_CELL_CYCLE_TARGETS_OF_TP53_AND_TP73_DN                                              | 1.6717665 | 0.009803922 | 0.070814    | 1 |
| MEISSNER_BRAIN_HCP_WITH_H3K27ME3                                                          | 1.6701419 | 0           | 0.071504    | 1 |
| REACTOME_DISEASES_OF_IMMUNE_SYSTEM                                                        | 1.669293  | 0.011450382 | 0.071546346 | 1 |
| LI_INDUCED_T_TO_NATURAL_KILLER_UP                                                         | 1.6688527 | 0           | 0.07138012  | 1 |
| ONO_AML1_TARGETS_DN                                                                       | 1.6686071 | 0.005859375 | 0.071056135 | 1 |
| JISON_SICKLE_CELL_DISEASE_UP                                                              | 1.6663535 | 0           | 0.072054215 | 1 |
| GRAHAM_CML_DIVIDING_VS_NORMAL_QUIESCENT_DN                                                | 1.6655172 | 0           | 0.07215565  | 1 |
| FARMER_BREAST_CANCER_CLUSTER_2                                                            | 1.6620158 | 0.007920792 | 0.07407018  | 1 |
| VALK_AML_CLUSTER_5                                                                        | 1.6574414 | 0.015779093 | 0.076718666 | 1 |
| YANG_BCL3_TARGETS_UP                                                                      | 1.6560555 | 0           | 0.07716853  | 1 |
| KEGG_COMPLEMENT_AND_COAGULATION_CASCADES                                                  | 1.6496891 | 0.001879699 | 0.08113549  | 1 |
| HUPER_BREAST_BASAL_VS_LUMINAL_DN                                                          | 1.6485649 | 0.011764706 | 0.08136986  | 1 |
| SCHUETZ_BREAST_CANCER_DUCTAL_INVASIVE_UP                                                  | 1.6445125 | 0           | 0.08368504  | 1 |
| KRIEG_KDM3A_TARGETS_NOT_HYPOXIA                                                           | 1.6417382 | 0           | 0.08520577  | 1 |
| KEGG_INTESTINAL_IMMUNE_NETWORK_FOR_IGA_PRODUCTION                                         | 1.639997  | 0.01754386  | 0.08591804  | 1 |
| BIOCARTA_TH1TH2_PATHWAY                                                                   | 1.6393495 | 0.015936255 | 0.085886866 | 1 |
| SHEPARD_BMYB_TARGETS                                                                      | 1.6384519 | 0.012244898 | 0.086019725 | 1 |
| REACTOME_ANTIGEN_ACTIVATES_B_CELL_RECEPTOR_BCR_LEADING_TO_GENERATION_OF_SECOND_MESSENGERS | 1.638233  | 0.011976048 | 0.0856472   | 1 |

|                                                       |           |             |             |   |
|-------------------------------------------------------|-----------|-------------|-------------|---|
| GAVIN_FOXP3_TARGETS_CLUSTER_P4                        | 1.6370009 | 0           | 0.08600623  | 1 |
| ALCALAY_AML_BY_NPM1_LOCALIZATION_DN                   | 1.6369673 | 0           | 0.085477434 | 1 |
| ISHIDA_E2F_TARGETS                                    | 1.6303155 | 0.001876173 | 0.089954205 | 1 |
| CHIANG_LIVER_CANCER_SUBCLASS_PROLIFERATION_UP         | 1.6273018 | 0           | 0.091710195 | 1 |
| FOSTER_KDM1A_TARGETS_UP                               | 1.6247002 | 0           | 0.093125    | 1 |
| LEE_TARGETS_OF_PTCH1_AND_SUFU_UP                      | 1.6216371 | 0.006276151 | 0.09516476  | 1 |
| FONTAINE_THYROID_TUMOR_UNCERTAIN_MALIGNANCY_DN        | 1.6207069 | 0.0186722   | 0.09538069  | 1 |
| KAAB_FAILED_HEART_VENTRICLE_DN                        | 1.6205975 | 0.010060363 | 0.09489728  | 1 |
| WANG_RESPONSE_TO_GSK3_INHIBITOR_SB216763_UP           | 1.6188102 | 0           | 0.095715135 | 1 |
| WORSCHER_TUMOR_EVASION_AND_TOLEROGENICITY_UP          | 1.6172116 | 0.019762846 | 0.096441716 | 1 |
| MATSUDA_NATURAL_KILLER_DIFFERENTIATION                | 1.6150467 | 0           | 0.09755749  | 1 |
| REACTOME_INTERLEUKIN_20_FAMILY_SIGNALING              | 1.6148942 | 0.034       | 0.09714845  | 1 |
| LINDSTEDT_DENDRITIC_CELL_MATURATION_D                 | 1.6112365 | 0.009746589 | 0.09980373  | 1 |
| TAVOR_CEBPA_TARGETS_DN                                | 1.6104733 | 0.02244898  | 0.099899255 | 1 |
| GARGALOVIC_RESPONSE_TO_OXIDIZED_PHOSPHOLIPIDS_PINK_DN | 1.610015  | 0.013307985 | 0.099682294 | 1 |
| PICCALUGA_ANGIOIMMUNOBLASTIC_LYMPHOMA_UP              | 1.6054101 | 0           | 0.10275926  | 1 |
| REACTOME_INTERLEUKIN_2_FAMILY_SIGNALING               | 1.6038246 | 0.01171875  | 0.10346831  | 1 |
| ZHONG_SECRETOME_OF_LUNG_CANCER_AND_ENDOTHELIUM        | 1.6029936 | 0.013888889 | 0.10358763  | 1 |
| KONDO_PROSTATE_CANCER_WITH_H3K27ME3                   | 1.6013297 | 0.005639098 | 0.10455093  | 1 |
| KEGG_PRIMARY_IMMUNODEFICIENCY                         | 1.5968322 | 0.025242718 | 0.108046725 | 1 |



|                                                        |           |             |             |   |
|--------------------------------------------------------|-----------|-------------|-------------|---|
| HUTTMANN_B_CLL_POOR_SURVIVAL_DN                        | 1.5943121 | 0.007984032 | 0.1095974   | 1 |
| REACTOME_INCRETIN_SYNTHESIS_SECRETION_AND_INACTIVATION | 1.5928118 | 0.019569471 | 0.110343456 | 1 |
| SENGUPTA_NASOPHARYNGEAL_CARCINOMA_UP                   | 1.5923461 | 0           | 0.110186756 | 1 |
| LEE_EARLY_T_LYMPHOCYTE_UP                              | 1.5903956 | 0.004310345 | 0.11146595  | 1 |
| GRAESSMANN_APOPTOSIS_BY_SERUM_DEPRIVATION_UP           | 1.5900137 | 0           | 0.1111094   | 1 |
| SMID_BREAST_CANCER_NORMAL_LIKE_UP                      | 1.5868336 | 0           | 0.11347031  | 1 |
| LY_AGING_MIDDLE_DN                                     | 1.5868328 | 0.026119404 | 0.112860255 | 1 |
| CASTELLANO_NRAS_TARGETS_UP                             | 1.5833777 | 0.005780347 | 0.11552922  | 1 |
| HAHTOLA_SEZARY_SYNDROM_UP                              | 1.5804491 | 0.004158004 | 0.11770305  | 1 |
| SASAKI_ADULT_T_CELL_LEUKEMIA                           | 1.579179  | 0           | 0.11832734  | 1 |
| BIOCARTA_IGF1MOTOR_PATHWAY                             | 1.5749254 | 0.01778656  | 0.12196519  | 1 |
| HOWLIN_CITED1_TARGETS_2_DN                             | 1.572457  | 0.03373016  | 0.12387486  | 1 |
| LINDSTEDT_DENDRITIC_CELL_MATURATION_A                  | 1.5712417 | 0.013972056 | 0.124545634 | 1 |
| PID_IL12_2PATHWAY                                      | 1.569984  | 0.00729927  | 0.12518045  | 1 |
| HOFFMANN_LARGE_TO_SMALL_PRE_BII_LYMPHOCYTE_UP          | 1.5668211 | 0.001960784 | 0.12786216  | 1 |
| KEGG_RIG_I_LIKE_RECEPTOR_SIGNALING_PATHWAY             | 1.5640893 | 0.005870841 | 0.1300404   | 1 |
| REACTOME_DECTIN_2_FAMILY                               | 1.5635228 | 0.024482109 | 0.12992121  | 1 |
| KUMAR_TARGETS_OF_MLL_AF9_FUSION                        | 1.5629566 | 0           | 0.12985675  | 1 |
| SOTIRIOU_BREAST_CANCER_GRADE_1_VS_3_UP                 | 1.5611299 | 0.003944773 | 0.1310197   | 1 |
| YAO_TEMPORAL_RESPONSE_TO_PROGESTERONE_CLUSTER_15       | 1.5610355 | 0.01980198  | 0.13048299  | 1 |

|                                                          |           |             |            |   |
|----------------------------------------------------------|-----------|-------------|------------|---|
| XU_AKT1_TARGETS_6HR                                      | 1.5605088 | 0.02173913  | 0.13036399 | 1 |
| KUROZUMI_RESPONSE_TO_ONCOCYTIC_VIRUS_AND_CYCLIC_RG<br>GD | 1.5603769 | 0.0295858   | 0.12984827 | 1 |
| SHIN_B_CELL_LYMPHOMA_CLUSTER_5                           | 1.5593513 | 0.03807615  | 0.13033222 | 1 |
| VERHAAK_AML_WITH_NPM1_MUTATED_UP                         | 1.5573971 | 0.00407332  | 0.1319256  | 1 |
| REACTOME_LAMININ_INTERACTIONS                            | 1.5561074 | 0.018552875 | 0.13255773 | 1 |
| DEMAGALHAES_AGING_UP                                     | 1.554513  | 0.027139874 | 0.1335861  | 1 |
| VERHAAK_GLIOMASTOMA_MESENCHYMAL                          | 1.5534968 | 0           | 0.1339256  | 1 |
| ZHOU_CELL_CYCLE_GENES_IN_IR_RESPONSE_24HR                | 1.5525407 | 0.001926782 | 0.13431393 | 1 |
| REACTOME_ANTIGEN_PROCESSING_CROSS_PRESENTATION           | 1.5515186 | 0.003976143 | 0.13472275 | 1 |
| DIAZ_CHRONIC_MEYLOGENOUS_LEUKEMIA_DN                     | 1.551082  | 0.002004008 | 0.13451906 | 1 |
| SHIN_B_CELL_LYMPHOMA_CLUSTER_7                           | 1.5492789 | 0.030075189 | 0.13581428 | 1 |
| REACTOME_PEPTIDE_LIGAND_BINDING_RECEPTORS                | 1.5478773 | 0.005882353 | 0.13683304 | 1 |
| RHODES_UNDIFFERENTIATED_CANCER                           | 1.5471098 | 0.004048583 | 0.13699232 | 1 |
| ZHAN_MULTIPLE_MYELOMA_CD1_UP                             | 1.5454564 | 0.021276595 | 0.13800354 | 1 |
| TANG_SENESCENCE_TP53_TARGETS_DN                          | 1.5445303 | 0.012269938 | 0.13831604 | 1 |
| GREENBAUM_E2A_TARGETS_UP                                 | 1.5426041 | 0.026422765 | 0.13981529 | 1 |
| WONG_ENDMETRIUM_CANCER_UP                                | 1.5424033 | 0.028169014 | 0.13942364 | 1 |
| HAN_JNK_SINGALING_UP                                     | 1.5362878 | 0.042105265 | 0.14566651 | 1 |
| KEGG_B_CELL_RECEPTOR_SIGNALING_PATHWAY                   | 1.5341367 | 0.00589391  | 0.14733325 | 1 |
| GRAHAM_NORMAL_QUIESCENT_VS_NORMAL_DIVIDING_DN            | 1.5310887 | 0.009823183 | 0.15023647 | 1 |

|                                                             |           |             |            |   |
|-------------------------------------------------------------|-----------|-------------|------------|---|
| WANG_BARRETTS_ESOPHAGUS_AND_ESOPHAGUS_CANCER_UP             | 1.530523  | 0.028355388 | 0.15026584 | 1 |
| REACTOME_COBALAMIN_CBL_VITAMIN_B12_TRANSPORT_AND_METABOLISM | 1.527235  | 0.054435484 | 0.1535503  | 1 |
| ODONNELL_TFRC_TARGETS_DN                                    | 1.526841  | 0.003883495 | 0.15343583 | 1 |
| FULCHER_INFLAMMATORY_RESPONSE_LECTIN_VS_LPS_DN              | 1.5264323 | 0           | 0.15322985 | 1 |
| SERVITJA_LIVER_HNF1A_TARGETS_DN                             | 1.5216709 | 0.007843138 | 0.1581521  | 1 |
| ROY_WOUND_BLOOD_VESSEL_UP                                   | 1.5201737 | 0.023605151 | 0.15910855 | 1 |
| EPPERT_CE_HSC_LSC                                           | 1.5196112 | 0.016632017 | 0.15906277 | 1 |
| AFFAR_YY1_TARGETS_DN                                        | 1.5177302 | 0           | 0.16059296 | 1 |
| ZWANG_EGF_PERSISTENTLY_UP                                   | 1.5175345 | 0.031746034 | 0.16014172 | 1 |
| FLECHNER_BIOPSY_KIDNEY_TRANSPLANT_REJECTED_VS_OK_UP         | 1.5173904 | 0.009541985 | 0.15964912 | 1 |
| KONG_E2F3_TARGETS                                           | 1.5158777 | 0.006036217 | 0.1608463  | 1 |
| ZHANG_RESPONSE_TO_IKK_INHIBITOR_AND_TNF_UP                  | 1.5152814 | 0.001984127 | 0.16094732 | 1 |
| KEGG_SYSTEMIC_LUPUS_ERYTHEMATOSUS                           | 1.5149252 | 0.015655577 | 0.16066203 | 1 |
| ANDERSEN_CHOLANGIOCARCINOMA_CLASS2                          | 1.5138248 | 0.001964637 | 0.16126926 | 1 |
| KEGG_JAK_STAT_SIGNALING_PATHWAY                             | 1.5118368 | 0.008316008 | 0.1628176  | 1 |
| ZHONG_SECRETOME_OF_LUNG_CANCER_AND_MACROPHAGE               | 1.5107446 | 0.016393442 | 0.1634645  | 1 |
| FOSTER_TOLERANT_MACROPHAGE_UP                               | 1.5085534 | 0.00390625  | 0.16533762 | 1 |
| ZHOU_INFLAMMATORY_RESPONSE_LPS_UP                           | 1.5063673 | 0.001976285 | 0.1673532  | 1 |
| BURTON_ADIPOGENESIS_PEAK_AT_24HR                            | 1.5062038 | 0.021235522 | 0.16685314 | 1 |

|                                                   |           |             |            |   |
|---------------------------------------------------|-----------|-------------|------------|---|
| ROZANOV_MMP14_TARGETS_DN                          | 1.5046704 | 0.038306452 | 0.16820276 | 1 |
| TAKEDA_TARGETS_OF_NUP98_HOXA9_FUSION_10D_DN       | 1.5021884 | 0.01010101  | 0.17055087 | 1 |
| FIGUEROA_AML_METHYLATION_CLUSTER_5_DN             | 1.4987797 | 0.02970297  | 0.17402872 | 1 |
| LU_TUMOR_VASCULATURE_UP                           | 1.4962422 | 0.04312115  | 0.17662728 | 1 |
| KEGG_GLYCINE_SERINE_AND_THREONINE_METABOLISM      | 1.4960216 | 0.044354837 | 0.17621914 | 1 |
| MIKKELSEN_NPC_ICP_WITH_H3K4ME3                    | 1.4943931 | 0           | 0.17761639 | 1 |
| LEE_LIVER_CANCER_MYC_TGFA_DN                      | 1.4897562 | 0.031558186 | 0.18275845 | 1 |
| NABA_MATRISOME_ASSOCIATED                         | 1.4875814 | 0           | 0.18513939 | 1 |
| NABA_BASEMENT_MEMBRANES                           | 1.4830935 | 0.047808766 | 0.1906846  | 1 |
| SENGUPTA_NASOPHARYNGEAL_CARCINOMA_WITH_LMP1_UP    | 1.4829075 | 0           | 0.19013426 | 1 |
| REACTOME_MOLECULES_ASSOCIATED_WITH_ELASTIC_FIBRES | 1.480316  | 0.032786883 | 0.193033   | 1 |
| HUANG_FOXA2_TARGETS_DN                            | 1.4768016 | 0.04789272  | 0.1971309  | 1 |
| RICKMAN_HEAD_AND_NECK_CANCER_D                    | 1.4726437 | 0.0665362   | 0.20239632 | 1 |
| SU_TESTIS                                         | 1.4706681 | 0.018828452 | 0.20432428 | 1 |
| REACTOME_MET_ACTIVATES_PTK2_SIGNALING             | 1.4705129 | 0.052208837 | 0.20372781 | 1 |
| LIAN_NEUTROPHIL_GRANULE_CONSTITUENTS              | 1.4700816 | 0.050403226 | 0.20355314 | 1 |
| REACTOME_FGFR2_LIGAND_BINDING_AND_ACTIVATION      | 1.4694169 | 0.060311284 | 0.20365626 | 1 |
| CHEMNITZ_RESPONSE_TO_PROSTAGLANDIN_E2_UP          | 1.4674361 | 0.011976048 | 0.20555206 | 1 |
| PID_INTEGRIN1_PATHWAY                             | 1.4669714 | 0.035433073 | 0.20541592 | 1 |
| COATES_MACROPHAGE_M1_VS_M2_UP                     | 1.4641922 | 0.011494253 | 0.20873573 | 1 |
| VANTVEER_BREAST_CANCER_BRCA1_UP                   | 1.4602537 | 0.040229887 | 0.21371785 | 1 |

|                                                                                                     |           |             |            |   |
|-----------------------------------------------------------------------------------------------------|-----------|-------------|------------|---|
| WHITEFORD_PEDIATRIC_CANCER_MARKERS                                                                  | 1.4587082 | 0.003868472 | 0.2152782  | 1 |
| NAKAMURA_CANCER_MICROENVIRONMENT_UP                                                                 | 1.4576564 | 0.05950096  | 0.21595868 | 1 |
| LE_EGR2_TARGETS_UP                                                                                  | 1.4571192 | 0.011650485 | 0.21592653 | 1 |
| TAKEDA_TARGETS_OF_NUP98_HOXA9_FUSION_16D_DN                                                         | 1.4553918 | 0.01775148  | 0.21770944 | 1 |
| CAIRO_LIVER_DEVELOPMENT_DN                                                                          | 1.4532869 | 0.001953125 | 0.22011483 | 1 |
| ZHENG_FOXP3_TARGETS_UP                                                                              | 1.4488583 | 0.055238094 | 0.22616921 | 1 |
| DUTERTRE ESTRADIOL_RESPONSE_24HR_UP                                                                 | 1.4483082 | 0.004048583 | 0.22624448 | 1 |
| BIOCARTA_INTRINSIC_PATHWAY                                                                          | 1.4458243 | 0.061185468 | 0.22945103 | 1 |
| KEGG_OLFACTORY_TRANSDUCTION                                                                         | 1.4444479 | 0.004056795 | 0.23083809 | 1 |
| PETROVA_PROX1_TARGETS_UP                                                                            | 1.4444073 | 0.06042885  | 0.23004365 | 1 |
| HUANG_DASATINIB_RESISTANCE_UP                                                                       | 1.4431871 | 0.01871102  | 0.23123395 | 1 |
| BYSTROEM_CORRELATED_WITH_IL5_DN                                                                     | 1.4426343 | 0.0256917   | 0.23134637 | 1 |
| LU_TUMOR_ANGIOGENESIS_UP                                                                            | 1.4419037 | 0.06854839  | 0.23166825 | 1 |
| RICKMAN_HEAD_AND_NECK_CANCER_A                                                                      | 1.4393405 | 0.016359918 | 0.23504391 | 1 |
| ZHONG_SECRETOME_OF_LUNG_CANCER_AND_FIBROBLAST                                                       | 1.4364234 | 0.009823183 | 0.2389357  | 1 |
| BROWN_MYELOID_CELL_DEVELOPMENT_UP                                                                   | 1.4339219 | 0.01048218  | 0.24224535 | 1 |
| XU_CREBBP_TARGETS_UP                                                                                | 1.4330221 | 0.056640625 | 0.24286523 | 1 |
| BURTON_ADIPOGENESIS_3                                                                               | 1.4318532 | 0.017374517 | 0.24396385 | 1 |
| REACTOME_G_ALPHA_S_SIGNALLING_EVENTS                                                                | 1.4316971 | 0           | 0.2433337  | 1 |
| REACTOME_RESPIRATORY_ELECTRON_TRANSPORT_ATP_SYNTHESIS_BY_CHEMIOSMOTIC_COUPLING_AND_HEAT_PRODUCTION_ | 1.430145  | 0.022514071 | 0.24508418 | 1 |

|                                                                                                                                   |            |                  |                  |                   |
|-----------------------------------------------------------------------------------------------------------------------------------|------------|------------------|------------------|-------------------|
| BY_UNCOUPLING_PROTEINS                                                                                                            |            |                  |                  |                   |
| MEISSNER_NPC_HCP_WITH_H3K27ME3                                                                                                    | 1.4300109  | 0.05668016       | 0.24442439       | 1                 |
| MULLIGHAN_NPM1_MUTATED_SIGNATURE_1_UP                                                                                             | 1.4291614  | 0.001992032      | 0.24498336       | 1                 |
| YAMASHITA_METHYLATED_IN_PROSTATE_CANCER                                                                                           | 1.4275005  | 0.03976143       | 0.246848         | 1                 |
| REACTOME_INTEGRIN_CELL_SURFACE_INTERACTIONS                                                                                       | 1.4263513  | 0.024096385      | 0.24783216       | 1                 |
| BOHN_PRIMARY_IMMUNODEFICIENCY_SYNDROM_DN                                                                                          | 1.4263283  | 0.056640625      | 0.24699305       | 1                 |
| ODONNELL_TARGETS_OF_MYC_AND_TFRC_DN                                                                                               | 1.4251865  | 0.04315197       | 0.24799064       | 1                 |
| LEIN_PONS_MARKERS                                                                                                                 | 1.4244528  | 0.032520324      | 0.24837147       | 1                 |
| HOLLERN_EMT_BREAST_TUMOR_UP                                                                                                       | 1.422103   | 0.016632017      | 0.24985772       | 1                 |
| <b><i>p53</i><sup>-/-</sup> V-Fus CD4 naïve T cells vs <i>p53</i><sup>-/-</sup> CD4 naïve T cells at non-tumor bearing status</b> | <b>NES</b> | <b>NOM p-val</b> | <b>FDR q-val</b> | <b>FWER p-val</b> |
| GAVIN_FOXP3_TARGETS_CLUSTER_P6                                                                                                    | 2.4609816  | 0                | 0                | 0                 |
| KEGG_TYPE_I_DIABETES_MELLITUS                                                                                                     | 2.2926378  | 0                | 4.09E-04         | 0.001             |
| GOLDRATH_ANTIGEN_RESPONSE                                                                                                         | 2.2583098  | 0                | 5.42E-04         | 0.002             |
| GAVIN_PDE3B_TARGETS                                                                                                               | 2.2093413  | 0                | 0.001221768      | 0.006             |
| REACTOME_TNFS_BIND_THEIR_PHYSIOLOGICAL_RECEPTORS                                                                                  | 2.1822565  | 0                | 0.001140655      | 0.007             |
| REACTOME_OLFACTORY_SIGNALING_PATHWAY                                                                                              | 2.125004   | 0                | 0.00298261       | 0.022             |
| NAKAJIMA_MAST_CELL                                                                                                                | 2.10274    | 0                | 0.002670561      | 0.023             |
| SANA_RESPONSE_TO_IFNG_UP                                                                                                          | 2.0753806  | 0                | 0.004677448      | 0.046             |
| KLEIN_PRIMARY EFFUSION_LYMPHOMA_DN                                                                                                | 2.0732665  | 0                | 0.004246665      | 0.047             |
| BROWNE_INTERFERON_RESPONSIVE_GENES                                                                                                | 2.0520396  | 0                | 0.005607946      | 0.069             |

|                                                       |           |             |             |       |
|-------------------------------------------------------|-----------|-------------|-------------|-------|
| FLORIO_NEOCORTEX_BASAL_RADIAL_GLIA_DN                 | 2.0518324 | 0           | 0.005098132 | 0.069 |
| KUROZUMI_RESPONSE_TO_ONCOCYTIC_VIRUS                  | 2.0448098 | 0           | 0.005758433 | 0.084 |
| GAVIN_IL2_RESPONSIVE_FOXP3_TARGETS_UP                 | 2.036178  | 0           | 0.00656399  | 0.101 |
| KEGG_GRAFT_VERSUS_HOST_DISEASE                        | 1.9894173 | 0           | 0.012949294 | 0.197 |
| GAVIN_FOXP3_TARGETS_CLUSTER_T4                        | 1.9689605 | 0           | 0.016562596 | 0.266 |
| HANN_RESISTANCE_TO_BCL2_INHIBITOR_UP                  | 1.9683245 | 0           | 0.01562825  | 0.268 |
| ZHAN_MULTIPLE_MYELOMA_PR_UP                           | 1.963644  | 0           | 0.015617113 | 0.278 |
| GARGALOVIC_RESPONSE_TO_OXIDIZED_PHOSPHOLIPIDS_PINK_DN | 1.960174  | 0.002583979 | 0.015380167 | 0.286 |
| PLASARI_TGFB1_TARGETS_10HR_DN                         | 1.9458071 | 0           | 0.018291181 | 0.342 |
| LIAN_LIPA_TARGETS_6M                                  | 1.9149238 | 0           | 0.02574418  | 0.463 |
| LI_INDUCED_T_TO_NATURAL_KILLER_UP                     | 1.9133162 | 0           | 0.02494387  | 0.468 |
| BOSCO_TH1_CYTOTOXIC_MODULE                            | 1.910425  | 0           | 0.024624096 | 0.481 |
| KIM_GLIS2_TARGETS_UP                                  | 1.8979495 | 0           | 0.02750314  | 0.538 |
| NAKAYAMA_SOFT_TISSUE_TUMORS_PCA2_UP                   | 1.8948809 | 0           | 0.02727885  | 0.55  |
| ANDERSEN_CHOLANGIOCARCINOMA_CLASS2                    | 1.8849798 | 0           | 0.02942638  | 0.596 |
| GAVIN_FOXP3_TARGETS_CLUSTER_P4                        | 1.8835677 | 0           | 0.028820578 | 0.604 |
| KRASNOSELSKAYA_ILF3_TARGETS_UP                        | 1.8645966 | 0           | 0.034679323 | 0.688 |
| KEGG_ALLOGRAFT_REJECTION                              | 1.8582741 | 0           | 0.03626084  | 0.719 |
| HOFFMANN_SMALL_PRE_BII_TO_IMMATURE_B_LYMPHOCYTE_UP    | 1.8569223 | 0           | 0.035655957 | 0.724 |

|                                                                                   |           |             |             |       |
|-----------------------------------------------------------------------------------|-----------|-------------|-------------|-------|
| MEISSNER_BRAIN_HCP_WITH_H3K27ME3                                                  | 1.8550543 | 0           | 0.035119478 | 0.729 |
| LIU_VAV3_PROSTATE_CARCINOGENESIS_UP                                               | 1.8449517 | 0.002659574 | 0.038720515 | 0.772 |
| ICHIBA_GRAFT_VERSUS_HOST_DISEASE_D7_UP                                            | 1.8369209 | 0           | 0.04147175  | 0.806 |
| SHIN_B_CELL_LYMPHOMA_CLUSTER_9                                                    | 1.8346584 | 0.004385965 | 0.041172113 | 0.813 |
| BOYLAN_MULTIPLE_MYELOMA_PCA1_UP                                                   | 1.8324982 | 0           | 0.04101204  | 0.816 |
| ROSTY_CERVICAL_CANCER_PROLIFERATION_CLUSTER                                       | 1.825257  | 0           | 0.04371365  | 0.845 |
| PID_IL27_PATHWAY                                                                  | 1.8232684 | 0           | 0.04340172  | 0.852 |
| GAURNIER_PSMD4_TARGETS                                                            | 1.8208315 | 0           | 0.043262217 | 0.858 |
| WIELAND_UP_BY_HBV_INFECTION                                                       | 1.8174015 | 0           | 0.04352594  | 0.866 |
| LIAN_LIPA_TARGETS_3M                                                              | 1.8151937 | 0           | 0.043476492 | 0.871 |
| KANG_DOXORUBICIN_RESISTANCE_UP                                                    | 1.8137574 | 0           | 0.043178573 | 0.876 |
| ONO_AML1_TARGETS_DN                                                               | 1.809105  | 0           | 0.044205733 | 0.889 |
| KEGG_CYTOKINE_CYTOKINE_RECEPTOR_INTERACTION                                       | 1.8041844 | 0           | 0.04510927  | 0.898 |
| FONTAINE_THYROID_TUMOR_UNCERTAIN_MALIGNANCY_DN                                    | 1.7979383 | 0           | 0.04705327  | 0.912 |
| RORIE_TARGETS_OF_EWSR1_FLI1_FUSION_DN                                             | 1.7758678 | 0.002298851 | 0.058805786 | 0.952 |
| WENG_POR_TARGETS_GLOBAL_UP                                                        | 1.7736459 | 0.008849558 | 0.0590868   | 0.956 |
| LEE_EARLY_T_LYMPHOCYTE_UP                                                         | 1.7621946 | 0           | 0.064742446 | 0.969 |
| REACTOME_IMMUNOREGULATORY_INTERACTIONS_BETWEEN_A_LYMPHOID_AND_A_NON_LYMPHOID_CELL | 1.7554277 | 0           | 0.06826724  | 0.976 |
| LI_WILMS_TUMOR_ANAPLASTIC_UP                                                      | 1.7538695 | 0.009153318 | 0.06809833  | 0.976 |
| REACTOME_INTERFERON_GAMMA_SIGNALING                                               | 1.7469813 | 0           | 0.07153838  | 0.983 |



|                                                 |           |             |             |       |
|-------------------------------------------------|-----------|-------------|-------------|-------|
| GAVIN_FOXP3_TARGETS_CLUSTER_P3                  | 1.7431674 | 0           | 0.07296516  | 0.987 |
| KONDO_PROSTATE_CANCER_WITH_H3K27ME3             | 1.7426466 | 0           | 0.07177239  | 0.987 |
| BOSCO_INTERFERON_INDUCED_ANTIVIRAL_MODULE       | 1.7368311 | 0.005361931 | 0.07439018  | 0.99  |
| WEBER_METHYLATED_HCP_IN_SPERM_UP                | 1.727065  | 0.009090909 | 0.080139525 | 0.993 |
| BIOCARTA_TH1TH2_PATHWAY                         | 1.7203859 | 0.004694836 | 0.08443967  | 0.997 |
| MEISSNER_NPC_HCP_WITH_H3K27ME3                  | 1.7164859 | 0.00257732  | 0.08562749  | 0.997 |
| WANG_BARRETTS_ESOPHAGUS_AND_ESOPHAGUS_CANCER_UP | 1.7146302 | 0.006818182 | 0.08551538  | 0.997 |
| GREENBAUM_E2A_TARGETS_UP                        | 1.7133105 | 0.004950495 | 0.08515572  | 0.997 |
| MARKEY_RB1_ACUTE_LOF_DN                         | 1.7132508 | 0           | 0.08371525  | 0.997 |
| MIKKELSEN_MEF_LCP_WITH_H3K4ME3                  | 1.7129911 | 0           | 0.08255605  | 0.997 |
| PETROVA_PROX1_TARGETS_UP                        | 1.7074852 | 0.014084507 | 0.085391626 | 0.998 |
| VANASSE_BCL2_TARGETS_DN                         | 1.7068089 | 0           | 0.08456264  | 0.998 |
| WHITEFORD_PEDIATRIC_CANCER_MARKERS              | 1.7049253 | 0           | 0.08472997  | 0.998 |
| YAN_ESCAPE_FROM_ANOIKIS                         | 1.7035642 | 0.014423077 | 0.08447823  | 0.998 |
| NAKAYAMA_SOFT_TISSUE_TUMORS_PCA1_UP             | 1.6990703 | 0.005509642 | 0.08656605  | 0.998 |
| MCLACHLAN_DENTAL_CARIES_UP                      | 1.6955476 | 0           | 0.088267826 | 0.998 |
| CHIANG_LIVER_CANCER_SUBCLASS_INTERFERON_UP      | 1.6865243 | 0.011764706 | 0.09410631  | 0.999 |
| PID_IL23_PATHWAY                                | 1.6864005 | 0.007334963 | 0.09281071  | 0.999 |
| AFFAR_YY1_TARGETS_DN                            | 1.6833456 | 0           | 0.09427444  | 0.999 |
| MORI_LARGE_PRE_BII_LYMPHOCYTE_DN                | 1.6808912 | 0.002610966 | 0.09478947  | 0.999 |
| WUNDER_INFLAMMATORY_RESPONSE_AND_CHOLESTEROL_UP | 1.6786027 | 0.00486618  | 0.09543958  | 0.999 |

|                                                     |           |             |             |   |
|-----------------------------------------------------|-----------|-------------|-------------|---|
| MIKKELSEN_ES_ICP_WITH_H3K4ME3_AND_H3K27ME3          | 1.6737026 | 0           | 0.09840216  | 1 |
| CHIANG_LIVER_CANCER_SUBCLASS_PROLIFERATION_UP       | 1.6686623 | 0           | 0.10178713  | 1 |
| MIKKELSEN_IPS_WITH_HCP_H3K27ME3                     | 1.6625504 | 0           | 0.10564245  | 1 |
| REACTOME_PEPTIDE_LIGAND_BINDING_RECEPTORS           | 1.6613427 | 0           | 0.10523696  | 1 |
| KEGG_ASTHMA                                         | 1.6599805 | 0.006802721 | 0.10502898  | 1 |
| MIKKELSEN_ES_LCP_WITH_H3K4ME3                       | 1.6567053 | 0           | 0.106601    | 1 |
| HUANG_FOXA2_TARGETS_DN                              | 1.6564227 | 0.006960557 | 0.105553545 | 1 |
| OSADA_ASCL1_TARGETS_UP                              | 1.6559151 | 0.007125891 | 0.10458392  | 1 |
| KUROZUMI_RESPONSE_TO_ONCOCYTIC_VIRUS_AND_CYCLIC_RGD | 1.6515052 | 0.01594533  | 0.10729362  | 1 |
| FARMER_BREAST_CANCER_CLUSTER_2                      | 1.6509031 | 0.014778325 | 0.10641734  | 1 |
| SCIAN_CELL_CYCLE_TARGETS_OF_TP53_AND_TP73_DN        | 1.6486958 | 0.006993007 | 0.10724934  | 1 |
| POOLA_INVASIVE_BREAST_CANCER_UP                     | 1.6486621 | 0           | 0.10598173  | 1 |
| LEE_LIVER_CANCER_MYC_TGFA_DN                        | 1.6455729 | 0.002824859 | 0.10730972  | 1 |
| ZHAN_MULTIPLE_MYELOMA_CD1_UP                        | 1.644508  | 0           | 0.10709657  | 1 |
| MEISSNER_BRAIN_HCP_WITH_H3K4ME2_AND_H3K27ME3        | 1.6410506 | 0.00234192  | 0.10896064  | 1 |
| DUTERTRE ESTRADIOL_RESPONSE_24HR_UP                 | 1.640707  | 0           | 0.10797606  | 1 |
| CROONQUIST_NRAS_SIGNALING_UP                        | 1.6331279 | 0.012820513 | 0.11457331  | 1 |
| PICCALUGA_ANGIOIMMUNOBLASTIC_LYMPHOMA_UP            | 1.63086   | 0           | 0.115496434 | 1 |
| WORSCHER_TUMOR_REJECTION_UP                         | 1.630563  | 0.002450981 | 0.1144806   | 1 |
| HAHTOLA_SEZARY_SYNDROM_DN                           | 1.6303829 | 0.009345794 | 0.1134525   | 1 |

|                                                  |           |             |            |   |
|--------------------------------------------------|-----------|-------------|------------|---|
| QI_PLASMACYTOMA_UP                               | 1.627905  | 0           | 0.11453194 | 1 |
| REACTOME_MET_ACTIVATES_PTK2_SIGNALING            | 1.6264181 | 0.013729977 | 0.11485305 | 1 |
| MAEKAWA_ATF2_TARGETS                             | 1.6242883 | 0.025       | 0.11554676 | 1 |
| PID_INTEGRIN_CS_PATHWAY                          | 1.6233352 | 0.014184397 | 0.1152416  | 1 |
| GAL_LEUKEMIC_STEM_CELL_DN                        | 1.6195939 | 0           | 0.11787682 | 1 |
| KLEIN_TARGETS_OF_BCR_ABL1_FUSION                 | 1.6180879 | 0.009852217 | 0.11838512 | 1 |
| VALK_AML_CLUSTER_13                              | 1.6168219 | 0.013186813 | 0.11841989 | 1 |
| SERVITJA_LIVER_HNF1A_TARGETS_UP                  | 1.6057584 | 0           | 0.12801889 | 1 |
| LU_TUMOR_VASCULATURE_UP                          | 1.5991826 | 0.021531101 | 0.1336919  | 1 |
| KEGG_AUTOIMMUNE_THYROID_DISEASE                  | 1.598355  | 0.023980815 | 0.13316575 | 1 |
| CHIANG_LIVER_CANCER_SUBCLASS_CTNNB1_DN           | 1.5968419 | 0.002890173 | 0.13357712 | 1 |
| MIKKELSEN_MCV6_ICP_WITH_H3K27ME3                 | 1.5963955 | 0.002673797 | 0.13274628 | 1 |
| REACTOME_DECTIN_2_FAMILY                         | 1.5893923 | 0.021686748 | 0.13893402 | 1 |
| KEGG_OLFACTORY_TRANSDUCTION                      | 1.5882634 | 0           | 0.13886996 | 1 |
| BOYLAN_MULTIPLE_MYELOMA_C_D_DN                   | 1.5856516 | 0           | 0.14041033 | 1 |
| MIKKELSEN_IPS_LCP_WITH_H3K4ME3                   | 1.5851125 | 0           | 0.1396674  | 1 |
| CROONQUIST_IL6_DEPRIVATION_DN                    | 1.5815951 | 0           | 0.14204189 | 1 |
| NABA_ECM_AFFILIATED                              | 1.5814296 | 0.002801121 | 0.14091583 | 1 |
| NABA_BASEMENT_MEMBRANES                          | 1.5794954 | 0.011820331 | 0.1417829  | 1 |
| REACTOME_INTERLEUKIN_6_FAMILY_SIGNALING          | 1.5791594 | 0.022883296 | 0.14086223 | 1 |
| KEGG_AMINO_SUGAR_AND_NUCLEOTIDE_SUGAR_METABOLISM | 1.5738902 | 0.012594459 | 0.14545795 | 1 |

|                                                      |           |             |            |   |
|------------------------------------------------------|-----------|-------------|------------|---|
| VALK_AML_CLUSTER_4                                   | 1.5718138 | 0.02247191  | 0.14658101 | 1 |
| SERVITJA_ISLET_HNF1A_TARGETS_UP                      | 1.5717862 | 0           | 0.14531995 | 1 |
| FLORIO_NEOCORTEX_BASAL_RADIAL_GLIA_UP                | 1.5689834 | 0           | 0.14740826 | 1 |
| KIM_BIPOLAR_DISORDER_OLIGODENDROCYTE_DENSITY_CORR_DN | 1.561211  | 0.007692308 | 0.15554905 | 1 |
| KIM_MYC_AMPLIFICATION_TARGETS_DN                     | 1.5609119 | 0.002724796 | 0.15458666 | 1 |
| TANG_SENESCENCE_TP53_TARGETS_DN                      | 1.5605235 | 0.018229166 | 0.15375781 | 1 |
| EINAV_INTERFERON_SIGNATURE_IN_CANCER                 | 1.5603956 | 0.025581395 | 0.15264146 | 1 |
| REACTOME_G_ALPHA_S_SIGNALLING_EVENTS                 | 1.5550104 | 0           | 0.15795867 | 1 |
| KEGG_CELL_ADHESION_MOLECULES_CAMS                    | 1.5517256 | 0           | 0.16103521 | 1 |
| LU_TUMOR_ENDOTHELIAL_MARKERS_UP                      | 1.547866  | 0.032183908 | 0.16450702 | 1 |
| SAMOLS_TARGETS_OF_KHSV_MIRNAS_DN                     | 1.5475546 | 0.028795812 | 0.16350445 | 1 |
| IVANOVA_HEMATOPOIESIS_INTERMEDIATE_PROGENITOR        | 1.5467223 | 0           | 0.16326533 | 1 |
| ZHOU_CELL_CYCLE_GENES_IN_IR_RESPONSE_24HR            | 1.5423851 | 0.011764706 | 0.16722648 | 1 |
| ONO_FOXP3_TARGETS_DN                                 | 1.5395558 | 0.03255814  | 0.16965088 | 1 |
| VERHAAK_GLIOMASTOMA_MESENCHYMAL                      | 1.534672  | 0           | 0.17472774 | 1 |
| CLASPER_LYMPHATIC_VESSELS_DURING_METASTASIS_DN       | 1.5333022 | 0.020997375 | 0.17518638 | 1 |
| BRUNO_HEMATOPOIESIS                                  | 1.5320746 | 0.002754821 | 0.17558926 | 1 |
| ICHIBA_GRAFT_VERSUS_HOST_DISEASE_35D_UP              | 1.5310143 | 0           | 0.17563131 | 1 |
| YAO_TEMPORAL_RESPONSE_TO_PROGESTERONE_CLUSTER_15     | 1.5300502 | 0.02189781  | 0.17542994 | 1 |
| LINDSTEDT_DENDRITIC_CELL_MATURATION_D                | 1.5270253 | 0.010362694 | 0.17814079 | 1 |

|                                                          |           |             |            |   |
|----------------------------------------------------------|-----------|-------------|------------|---|
| HELLER_SILENCED_BY_METHYLATION_UP                        | 1.5239711 | 0           | 0.18095939 | 1 |
| HECKER_IFNB1_TARGETS                                     | 1.5229721 | 0.01055409  | 0.18097366 | 1 |
| REACTOME_INTERLEUKIN_10_SIGNALING                        | 1.5201783 | 0.025345622 | 0.18314987 | 1 |
| SOTIRIOU_BREAST_CANCER_GRADE_1_VS_3_UP                   | 1.5158671 | 0.003401361 | 0.18795668 | 1 |
| HONRADO_BREAST_CANCER_BRCA1_VS_BRCA2                     | 1.5140046 | 0.03736264  | 0.18914461 | 1 |
| GRAHAM_CML_DIVIDING_VS_NORMAL_QUIESCENT_UP               | 1.5089718 | 0.003067485 | 0.19476457 | 1 |
| EGUCHI_CELL_CYCLE_RB1_TARGETS                            | 1.5086763 | 0.040865384 | 0.1938298  | 1 |
| VALK_AML_CLUSTER_9                                       | 1.5057889 | 0.025761124 | 0.19646375 | 1 |
| COATES_MACROPHAGE_M1_VS_M2_DN                            | 1.5054512 | 0.016666668 | 0.19558278 | 1 |
| REACTOME_MOLECULES_ASSOCIATED_WITH_ELASTIC_FIBRES        | 1.5039691 | 0.042410713 | 0.19631858 | 1 |
| REACTOME_CLASS_A_1_RHODOPSIN_LIKE_RECEPTORS              | 1.5037361 | 0.003215434 | 0.19528872 | 1 |
| MEISSNER_NPC_ICP_WITH_H3_UNMETHYLATED                    | 1.5028751 | 0.04157044  | 0.19514282 | 1 |
| LEIN_PONS_MARKERS                                        | 1.5007235 | 0.015544041 | 0.19680643 | 1 |
| SMIRNOV_RESPONSE_TO_IR_2HR_DN                            | 1.4998417 | 0.015957447 | 0.19665898 | 1 |
| REACTOME_IL_6_TYPE_CYTOKINE_RECEPTOR_LIGAND_INTERACTIONS | 1.4982133 | 0.045146726 | 0.19781254 | 1 |
| CONCANNON_APOPTOSIS_BY_EPOXOMICIN_DN                     | 1.4978226 | 0           | 0.19700618 | 1 |
| FIGUEROA_AML_METHYLATION_CLUSTER_5_DN                    | 1.4977059 | 0.0275      | 0.19588408 | 1 |
| BERTUCCI_MEDULLARY_VS_DUCTAL_BREAST_CANCER_UP            | 1.496986  | 0.003412969 | 0.19557911 | 1 |
| COATES_MACROPHAGE_M1_VS_M2_UP                            | 1.4966935 | 0.00862069  | 0.19473508 | 1 |
| MORI_IMMATURE_B_LYMPHOCYTE_UP                            | 1.4938885 | 0.025575448 | 0.1976805  | 1 |

|                                                           |           |             |            |   |
|-----------------------------------------------------------|-----------|-------------|------------|---|
| VANLOO_SP3_TARGETS_DN                                     | 1.4929363 | 0.008403362 | 0.1977511  | 1 |
| REACTOME_INTERFERON_ALPHA_BETA_SIGNALING                  | 1.4883733 | 0.016304348 | 0.20302084 | 1 |
| KEGG_STEROID_BIOSYNTHESIS                                 | 1.4879581 | 0.038990825 | 0.20234136 | 1 |
| ODONNELL_TARGETS_OF_MYC_AND_TFRC_DN                       | 1.4852976 | 0.023923445 | 0.20469639 | 1 |
| SASAKI_ADULT_T_CELL_LEUKEMIA                              | 1.4844671 | 0           | 0.20452073 | 1 |
| KEGG_INTESTINAL_IMMUNE_NETWORK_FOR_IGA_PRODUCTION         | 1.4829319 | 0.021428572 | 0.20524548 | 1 |
| SHEPARD_BMYB_TARGETS                                      | 1.4826344 | 0.022408964 | 0.20440878 | 1 |
| REACTOME_STING_MEDIATED_INDUCION_OF_HOST_IMMUNE_RESPONSES | 1.4821388 | 0.059382424 | 0.2038113  | 1 |
| ODONNELL_TFRC_TARGETS_DN                                  | 1.4818972 | 0.009036144 | 0.20293756 | 1 |
| MIKKELSEN_ES_HCP_WITH_H3K27ME3                            | 1.4809111 | 0.029545454 | 0.20308287 | 1 |
| MOHANKUMAR_HOXA1_TARGETS_DN                               | 1.4787849 | 0           | 0.20494418 | 1 |
| KORKOLA_YOLK_SAC_TUMOR                                    | 1.4748288 | 0.015463918 | 0.20962998 | 1 |
| VISALA_AGING_LYMPHOCYTE_DN                                | 1.4746819 | 0.042986427 | 0.20854436 | 1 |
| REACTOME_ADP_SIGNALLING_THROUGH_P2Y_PURINOCEPTOR_1        | 1.4742516 | 0.059241705 | 0.2078392  | 1 |
| MIKKELSEN_NPC_ICP_WITH_H3K4ME3                            | 1.4738834 | 0           | 0.20724846 | 1 |
| CROONQUIST_NRAS_SIGNALING_DN                              | 1.4729023 | 0.008426966 | 0.2073719  | 1 |
| REICHERT_MITOSIS_LIN9_TARGETS                             | 1.4710367 | 0.04118993  | 0.20879252 | 1 |
| BASSO_CD40_SIGNALING_UP                                   | 1.4709499 | 0.016759777 | 0.20770113 | 1 |
| GRAHAM_CML_DIVIDING_VS_NORMAL_QUIESCENT_DN                | 1.4682815 | 0.005076142 | 0.21069889 | 1 |

|                                                               |           |             |            |   |
|---------------------------------------------------------------|-----------|-------------|------------|---|
| REACTOME_CLASS_C_3_METABOTROPIC_Glutamate_Pheromone_Receptors | 1.4657506 | 0.06146572  | 0.21329725 | 1 |
| Takeda_Targets_of_NUP98_HOXA9_Fusion_16D_DN                   | 1.4638046 | 0.019607844 | 0.2149473  | 1 |
| Tarte_Plasma_Cell_vs_B_Lymphocyte_DN                          | 1.4637944 | 0.047505938 | 0.21372831 | 1 |
| Cadwell_ATG16L1_Targets_Up                                    | 1.4626589 | 0.020114943 | 0.214398   | 1 |
| Graham_Normal_Quiescent_vs_Normal_Dividing_DN                 | 1.4583338 | 0.016       | 0.21971142 | 1 |
| PID_Cone_Pathway                                              | 1.4579908 | 0.048275862 | 0.21904087 | 1 |
| Kong_E2F3_Targets                                             | 1.4560139 | 0.011764706 | 0.22076394 | 1 |
| NABA_ECM_Regulators                                           | 1.4559964 | 0.016025642 | 0.21954189 | 1 |
| Boylan_Multiple_Myeloma_D_DN                                  | 1.4544919 | 0.01344086  | 0.22054751 | 1 |
| Mikkelsen_NPC_LCP_with_H3K4Me3                                | 1.4530977 | 0.020151133 | 0.221558   | 1 |
| Wang_NFkB_Targets                                             | 1.452019  | 0.056737587 | 0.22195311 | 1 |
| Shen_SMARCA2_Targets_DN                                       | 1.4513962 | 0.003460208 | 0.22176453 | 1 |
| Bredemeyer_RAG_Signaling_Not_via_ATM_DN                       | 1.4507638 | 0.033854168 | 0.22158577 | 1 |
| Reactome_GPCR_Ligand_Binding                                  | 1.4499031 | 0.007352941 | 0.22163862 | 1 |
| Meissner_NPC_HCP_with_H3_Unmethylated                         | 1.449874  | 0           | 0.22051044 | 1 |
| Chen_ETV5_Targets_Sertoli                                     | 1.447093  | 0.056470588 | 0.22344981 | 1 |
| Wilensky_Response_to_Darapladib                               | 1.4461164 | 0.034013607 | 0.22369257 | 1 |
| Ohguchi_Liver_HNF4A_Targets_DN                                | 1.4458239 | 0.0132626   | 0.22298163 | 1 |
| Graham_Normal_Quiescent_vs_Normal_Dividing_Up                 | 1.4447597 | 0.034739453 | 0.22338958 | 1 |
| Riz_Erythroid_Differentiation_APOBEC2                         | 1.4420094 | 0.06954437  | 0.22645745 | 1 |

|                                              |           |             |            |   |
|----------------------------------------------|-----------|-------------|------------|---|
| SAFFORD_T_LYMPHOCYTE_ANERGY                  | 1.4413924 | 0.015503876 | 0.22630695 | 1 |
| SCHUETZ_BREAST_CANCER_DUCTAL_INVASIVE_UP     | 1.4406245 | 0           | 0.2263668  | 1 |
| LEE_TARGETS_OF_PTCH1_AND_SUFU_UP             | 1.4400913 | 0.033591732 | 0.22602335 | 1 |
| CHICAS_RB1_TARGETS_GROWING                   | 1.4395239 | 0.003584229 | 0.22572747 | 1 |
| GENTLES_LEUKEMIC_STEM_CELL_UP                | 1.4392514 | 0.060606062 | 0.22497441 | 1 |
| RICKMAN_HEAD_AND_NECK_CANCER_E               | 1.4391557 | 0.03233831  | 0.22397162 | 1 |
| REACTOME_CHEMOKINE_RECEPTORS_BIND_CHEMOKINES | 1.4370286 | 0.038659792 | 0.22581215 | 1 |
| RIZ_ERYTHROID_DIFFERENTIATION_6HR            | 1.4368659 | 0.05378973  | 0.22494234 | 1 |
| REACTOME_COMPLEX_I_BIOGENESIS                | 1.4344399 | 0.03021978  | 0.22745441 | 1 |
| MIKKELSEN_MEF_ICP_WITH_H3K27ME3              | 1.4339058 | 0.00310559  | 0.22710161 | 1 |
| BURTON_ADIPOGENESIS_3                        | 1.4331824 | 0.008746356 | 0.22719173 | 1 |
| MIKKELSEN_MEF_HCP_WITH_H3K27ME3              | 1.4324254 | 0           | 0.22735086 | 1 |
| ZHOU_CELL_CYCLE_GENES_IN_IR_RESPONSE_6HR     | 1.4321058 | 0.018567638 | 0.22677523 | 1 |
| LEIN_MIDBRAIN_MARKERS                        | 1.4303442 | 0.021680217 | 0.22850797 | 1 |
| PID_SYNDECAN_3_PATHWAY                       | 1.4289105 | 0.075170845 | 0.22965318 | 1 |
| GREENBAUM_E2A_TARGETS_DN                     | 1.4263648 | 0.085011184 | 0.2324118  | 1 |
| WANG_MLL_TARGETS                             | 1.4253981 | 0           | 0.23292416 | 1 |
| PLASARI_TGFB1_SIGNALING_VIA_NFIC_10HR_DN     | 1.4212114 | 0.053268764 | 0.23830496 | 1 |
| FINETTI_BREAST_CANCER_KINOME_RED             | 1.4211339 | 0.06542056  | 0.23727694 | 1 |
| OUILLETTE_CLL_13Q14_DELETION_DN              | 1.4194946 | 0.038560413 | 0.23870593 | 1 |
| REACTOME_ENDOGENOUS_STEROLS                  | 1.416934  | 0.07323232  | 0.24169172 | 1 |



|                                                                                                               |            |                  |                  |                   |
|---------------------------------------------------------------------------------------------------------------|------------|------------------|------------------|-------------------|
| KOHOUTEK_CCNT2_TARGETS                                                                                        | 1.4168297  | 0.027624309      | 0.2407471        | 1                 |
| REACTOME_INTERLEUKIN_20_FAMILY_SIGNALING                                                                      | 1.4158943  | 0.058411215      | 0.24117129       | 1                 |
| HOLLEMAN_ASPARAGINASE_RESISTANCE_ALL_DN                                                                       | 1.4155505  | 0.087804876      | 0.24051134       | 1                 |
| FOSTER_KDM1A_TARGETS_UP                                                                                       | 1.4128258  | 0.003333333      | 0.24372418       | 1                 |
| RICKMAN_HEAD_AND_NECK_CANCER_A                                                                                | 1.4104109  | 0.029569892      | 0.24668314       | 1                 |
| FONTAINE_PAPILLARY_THYROID_CARCINOMA_DN                                                                       | 1.4095042  | 0.03125          | 0.24703714       | 1                 |
| ABBUD_LIF_SIGNALING_1_DN                                                                                      | 1.4077821  | 0.08144797       | 0.24874006       | 1                 |
| SENGUPTA_NASOPHARYNGEAL_CARCINOMA_UP                                                                          | 1.40683    | 0                | 0.24924707       | 1                 |
| <b><i>p53</i><sup>-/-</sup> V-Fus CD4 memory T cells vs WT CD4 memory T cells at non-tumor bearing status</b> | <b>NES</b> | <b>NOM p-val</b> | <b>FDR q-val</b> | <b>FWER p-val</b> |
| BENNETT_SYSTEMIC_LUPUS_ERYTHEMATOSUS                                                                          | 2.298842   | 0                | 0                | 0                 |
| CROONQUIST_NRAS_SIGNALING_DN                                                                                  | 2.1538405  | 0                | 0.00744025       | 0.018             |
| CROONQUIST_IL6_DEPRIVATION_DN                                                                                 | 2.149995   | 0                | 0.00523207       | 0.019             |
| REACTOME_INTERFERON_ALPHA_BETA_SIGNALING                                                                      | 2.108988   | 0                | 0.010503752      | 0.051             |
| MAEKAWA_ATF2_TARGETS                                                                                          | 2.0928953  | 0                | 0.010538484      | 0.062             |
| KIM_LRRC3B_TARGETS                                                                                            | 2.0843596  | 0                | 0.00946979       | 0.067             |
| BROWNE_INTERFERON_RESPONSIVE_GENES                                                                            | 2.0816116  | 0                | 0.00835514       | 0.069             |
| GAVIN_FOXP3_TARGETS_CLUSTER_P6                                                                                | 2.0787444  | 0                | 0.007834083      | 0.074             |
| ICHIBA_GRAFT_VERSUS_HOST_DISEASE_D7_UP                                                                        | 2.0782282  | 0                | 0.007055597      | 0.075             |
| UROSEVIC_RESPONSE_TO_IMIQUIMOD                                                                                | 2.0708923  | 0                | 0.006930003      | 0.082             |
| VILIMAS_NOTCH1_TARGETS_DN                                                                                     | 2.0410504  | 0                | 0.009801956      | 0.122             |

|                                                   |           |             |             |       |
|---------------------------------------------------|-----------|-------------|-------------|-------|
| ZHAN_MULTIPLE_MYELOMA_PR_UP                       | 2.028427  | 0           | 0.011107302 | 0.148 |
| HECKER_IFNB1_TARGETS                              | 2.0133    | 0           | 0.012656835 | 0.185 |
| MARKEY_RB1_ACUTE_LOF_DN                           | 2.0079646 | 0           | 0.012571611 | 0.195 |
| KRASNOSELSKAYA_ILF3_TARGETS_UP                    | 2.0047565 | 0.002288329 | 0.012499092 | 0.208 |
| REACTOME_PHOSPHORYLATION_OF_THE_APC_C             | 1.9861412 | 0           | 0.016241947 | 0.278 |
| KIM_GLIS2_TARGETS_UP                              | 1.9772102 | 0           | 0.01664941  | 0.299 |
| FARMER_BREAST_CANCER_CLUSTER_1                    | 1.9546739 | 0           | 0.02106717  | 0.377 |
| WIELAND_UP_BY_HBV_INFECTION                       | 1.910043  | 0           | 0.03472049  | 0.547 |
| MOSERLE_IFNA_RESPONSE                             | 1.9041648 | 0           | 0.036228064 | 0.577 |
| FURUKAWA_DUSP6_TARGETS_PCI35_UP                   | 1.8835597 | 0           | 0.04374788  | 0.659 |
| BOYLAN_MULTIPLE_MYELOMA_PCA3_DN                   | 1.8753222 | 0           | 0.046361767 | 0.702 |
| ICHIBA_GRAFT_VERSUS_HOST_DISEASE_35D_UP           | 1.8648046 | 0           | 0.050732125 | 0.761 |
| SANA_RESPONSE_TO_IFNG_UP                          | 1.8640412 | 0.002493766 | 0.04892674  | 0.764 |
| KONG_E2F3_TARGETS                                 | 1.858664  | 0           | 0.05049886  | 0.787 |
| SOTIRIOU_BREAST_CANCER_GRADE_1_VS_3_UP            | 1.8538927 | 0           | 0.051619828 | 0.812 |
| BOSCO_INTERFERON_INDUCED_ANTIVIRAL_MODULE         | 1.8491073 | 0           | 0.0524522   | 0.831 |
| LY_AGING_MIDDLE_DN                                | 1.8486277 | 0.004494382 | 0.0509916   | 0.833 |
| LIU_VAV3_PROSTATE_CARCINOGENESIS_UP               | 1.8445642 | 0           | 0.052154772 | 0.852 |
| VALK_AML_CLUSTER_3                                | 1.836823  | 0.002132196 | 0.055040456 | 0.874 |
| JIANG_HYPOXIA_CANCER                              | 1.8336234 | 0           | 0.054856643 | 0.882 |
| GRAESSMANN_RESPONSE_TO_MC_AND_SERUM_DEPRIVATION_U | 1.8290334 | 0           | 0.055609927 | 0.888 |

|                                                                                                                                      |           |             |             |       |
|--------------------------------------------------------------------------------------------------------------------------------------|-----------|-------------|-------------|-------|
| P                                                                                                                                    |           |             |             |       |
| FLORIO_NEOCORTEX_BASAL_RADIAL_GLIA_DN                                                                                                | 1.8272799 | 0           | 0.055052374 | 0.89  |
| BURTON_ADIPOGENESIS_PEAK_AT_24HR                                                                                                     | 1.8228956 | 0           | 0.0556816   | 0.899 |
| GREENBAUM_E2A_TARGETS_UP                                                                                                             | 1.8069612 | 0           | 0.063974865 | 0.934 |
| YAN_ESCAPE_FROM_ANOIKIS                                                                                                              | 1.792967  | 0.002267574 | 0.07211592  | 0.962 |
| REICHERT_MITOSIS_LIN9_TARGETS                                                                                                        | 1.785741  | 0.00877193  | 0.07571276  | 0.975 |
| BOYLAN_MULTIPLE_MYELOMA_PCA1_UP                                                                                                      | 1.776144  | 0           | 0.0811287   | 0.983 |
| ROSS_AML_WITH_MLL_FUSIONS                                                                                                            | 1.7620925 | 0           | 0.09122209  | 0.992 |
| WORSCHER_TUMOR_REJECTION_UP                                                                                                          | 1.7526537 | 0.002320186 | 0.09764391  | 0.997 |
| AFFAR_YY1_TARGETS_DN                                                                                                                 | 1.7456944 | 0           | 0.1018497   | 0.998 |
| DAUER_STAT3_TARGETS_DN                                                                                                               | 1.7416044 | 0.002293578 | 0.10366578  | 0.999 |
| LIAN_LIPA_TARGETS_6M                                                                                                                 | 1.7397966 | 0           | 0.10286151  | 0.999 |
| REACTOME_INHIBITION_OF_THE_PROTEOLYTIC_ACTIVITY_OF_APC_C_REQUIRED_FOR_THE_ONSET_OF_ANAPHASE_BY_MITOTIC_SPINDLE_CHECKPOINT_COMPONENTS | 1.7380462 | 0.004494382 | 0.10252624  | 0.999 |
| REACTOME_ANTIMICROBIAL_PEPTIDES                                                                                                      | 1.7369787 | 0.002386635 | 0.1011062   | 0.999 |
| STEARMAN_TUMOR_FIELD_EFFECT_UP                                                                                                       | 1.7205875 | 0.006185567 | 0.116526745 | 0.999 |
| RADAEVA_RESPONSE_TO_IFNA1_UP                                                                                                         | 1.7181855 | 0.007109005 | 0.11634395  | 0.999 |
| GRAHAM_NORMAL_QUIESCENT_VS_NORMAL_DIVIDING_DN                                                                                        | 1.7103583 | 0           | 0.122880176 | 0.999 |
| COLINA_TARGETS_OF_4EBP1_AND_4EBP2                                                                                                    | 1.707183  | 0           | 0.12433775  | 0.999 |
| REACTOME_IMMUNOREGULATORY_INTERACTIONS_BETWEEN_                                                                                      | 1.7058533 | 0           | 0.123284094 | 0.999 |

|                                                                     |           |             |             |       |
|---------------------------------------------------------------------|-----------|-------------|-------------|-------|
| A_LYMPHOID_AND_A_NON_LYMPHOID_CELL                                  |           |             |             |       |
| JECHLINGER_EPITHELIAL_TO_MESENCHYMAL_TRANSITION_UP                  | 1.7034881 | 0           | 0.12360451  | 0.999 |
| CHIARETTI_T_ALL_RELAPSE_PROGNOSIS                                   | 1.7034141 | 0.011682243 | 0.121320456 | 0.999 |
| FERREIRA_EWINGS_SARCOMA_UNSTABLE_VS_STABLE_DN                       | 1.6982014 | 0.00243309  | 0.12515807  | 0.999 |
| TONKS_TARGETS_OF_RUNX1_RUNX1T1_FUSION_GRANULOCYTE_DN                | 1.6952765 | 0.012295082 | 0.12630485  | 0.999 |
| BOSCO_TH1_CYTOTOXIC_MODULE                                          | 1.6941774 | 0           | 0.12511611  | 1     |
| ZHOU_CELL_CYCLE_GENES_IN_IR_RESPONSE_24HR                           | 1.6935759 | 0           | 0.12364986  | 1     |
| GAVIN_IL2_RESPONSIVE_FOXP3_TARGETS_UP                               | 1.678309  | 0.015086207 | 0.13856235  | 1     |
| GAL_LEUKEMIC_STEM_CELL_DN                                           | 1.6755414 | 0           | 0.13986024  | 1     |
| MCLACHLAN_DENTAL_CARIES_UP                                          | 1.6747867 | 0           | 0.1383155   | 1     |
| ZHANG_INTERFERON_RESPONSE                                           | 1.6745609 | 0.016666668 | 0.13627043  | 1     |
| YAO_TEMPORAL_RESPONSE_TO_PROGESTERONE_CLUSTER_15                    | 1.6705332 | 0.006134969 | 0.1394238   | 1     |
| CASTELLANO_NRAS_TARGETS_UP                                          | 1.66876   | 0.002369668 | 0.13949469  | 1     |
| REACTOME_SIGNALLING_TO_ERKS                                         | 1.6672913 | 0.004405286 | 0.13896075  | 1     |
| REACTOME_CONVERSION_FROM_APC_C:CDC20_TO_APC_C:CDH1_IN_LATE_ANAPHASE | 1.6652815 | 0.021028038 | 0.13911253  | 1     |
| FINETTI_BREAST_CANCER_KINOME_RED                                    | 1.6628909 | 0.006864989 | 0.13976343  | 1     |
| ROSTY_CERVICAL_CANCER_PROLIFERATION_CLUSTER                         | 1.6619208 | 0           | 0.13868245  | 1     |
| LINDSTEDT_DENDRITIC_CELL_MATURATION_D                               | 1.6534514 | 0.002212389 | 0.1472472   | 1     |
| SHEPARD_BMYB_TARGETS                                                | 1.648274  | 0.002398082 | 0.15170144  | 1     |

|                                                                                       |           |             |            |   |
|---------------------------------------------------------------------------------------|-----------|-------------|------------|---|
| BOYLAN_MULTIPLE_MYELOMA_D_DN                                                          | 1.6454979 | 0           | 0.15283117 | 1 |
| BAUS_TFF2_TARGETS_UP                                                                  | 1.6410189 | 0.012958963 | 0.15639886 | 1 |
| ISHIDA_E2F_TARGETS                                                                    | 1.6362126 | 0.008830022 | 0.16053534 | 1 |
| BURTON_ADIPOGENESIS_3                                                                 | 1.6327333 | 0.00248139  | 0.163025   | 1 |
| TAKEDA_TARGETS_OF_NUP98_HOXA9_FUSION_3D_UP                                            | 1.6317143 | 0.002398082 | 0.16217759 | 1 |
| NAKAYAMA_SOFT_TISSUE_TUMORS_PCA2_UP                                                   | 1.6309186 | 0.002309469 | 0.16116557 | 1 |
| MISSIAGLIA_REGULATED_BY_METHYLATION_DN                                                | 1.6283921 | 0.007194245 | 0.16243891 | 1 |
| CADWELL_ATG16L1_TARGETS_UP                                                            | 1.6282743 | 0.006928407 | 0.16048597 | 1 |
| REACTOME_BIOSYNTHESIS_OF_SPECIALIZED_PRORESOLVING_MEDIATORS_SPMS                      | 1.6262003 | 0.025229357 | 0.16137373 | 1 |
| REACTOME_INTERFERON_GAMMA_SIGNALING                                                   | 1.6244441 | 0.002358491 | 0.16172682 | 1 |
| PID_PLK1_PATHWAY                                                                      | 1.6215063 | 0.00921659  | 0.16369255 | 1 |
| WHITEFORD_PEDIATRIC_CANCER_MARKERS                                                    | 1.6154327 | 0           | 0.16983528 | 1 |
| LEE_EARLY_T_LYMPHOCYTE_UP                                                             | 1.6098224 | 0.004938272 | 0.1756697  | 1 |
| HANN_RESISTANCE_TO_BCL2_INHIBITOR_UP                                                  | 1.602758  | 0.015765766 | 0.18372819 | 1 |
| REACTOME_ACTIVATION_OF_APC_C_AND_APC_C:CDC20_MEDIATED_DEGRADATION_OF_MITOTIC_PROTEINS | 1.5994742 | 0           | 0.186364   | 1 |
| REACTOME_DEPURINATION                                                                 | 1.5945001 | 0.013452915 | 0.19210671 | 1 |
| SMID_BREAST_CANCER_LUMINAL_A_DN                                                       | 1.5873868 | 0.04506438  | 0.2020543  | 1 |
| EINAV_INTERFERON_SIGNATURE_IN_CANCER                                                  | 1.5813148 | 0.01843318  | 0.2101246  | 1 |
| LIAN_LIPA_TARGETS_3M                                                                  | 1.580515  | 0.008888889 | 0.2091083  | 1 |

|                                                                                                                                     |            |                  |                  |                   |
|-------------------------------------------------------------------------------------------------------------------------------------|------------|------------------|------------------|-------------------|
| KANG_DOXORUBICIN_RESISTANCE_UP                                                                                                      | 1.5724418  | 0.014285714      | 0.22075492       | 1                 |
| HOFMANN_MYELODYSPLASTIC_SYNDROM_RISK_DN                                                                                             | 1.5713836  | 0.03742204       | 0.22012351       | 1                 |
| BROWN_MYELOID_CELL_DEVELOPMENT_UP                                                                                                   | 1.5669459  | 0.002673797      | 0.22543076       | 1                 |
| WUNDER_INFLAMMATORY_RESPONSE_AND_CHOLESTEROL_UP                                                                                     | 1.5637547  | 0.007177034      | 0.22831766       | 1                 |
| SENGUPTA_NASOPHARYNGEAL_CARCINOMA_UP                                                                                                | 1.5588945  | 0                | 0.23475905       | 1                 |
| XU_AKT1_TARGETS_6HR                                                                                                                 | 1.5558615  | 0.029850746      | 0.23769958       | 1                 |
| REACTOME_BASE_EXCISION_REPAIR_AP_SITE_FORMATION                                                                                     | 1.5539317  | 0.018223235      | 0.23906758       | 1                 |
| BOYAULT_LIVER_CANCER_SUBCLASS_G5_DN                                                                                                 | 1.5497006  | 0.038116593      | 0.24450804       | 1                 |
| ZHENG_IL22_SIGNALING_UP                                                                                                             | 1.5482119  | 0.009925558      | 0.2445329        | 1                 |
| HOFFMANN_PRE_BI_TO_LARGE_PRE_BII_LYMPHOCYTE_UP                                                                                      | 1.5441349  | 0.021321962      | 0.24954982       | 1                 |
| <b><i>p53<sup>-/-</sup></i> V-Fus CD4 memory T cells vs <i>p53<sup>-/-</sup></i> CD4 memory T cells at non-tumor bearing status</b> | <b>NES</b> | <b>NOM p-val</b> | <b>FDR q-val</b> | <b>FWER p-val</b> |
| nothing                                                                                                                             |            |                  |                  |                   |

**Supplementary Table 6: Somatic mutations detected by WES in 17 mice.**

| <b>ID</b> | <b>Chr</b> | <b>Start</b> | <b>End</b> | <b>Ref</b> | <b>Alt</b> | <b>Gene</b> | <b>Type of mutation</b> | <b>Depth</b> | <b>P-value (fisher)</b> | <b>P-value (EBCall)</b> |
|-----------|------------|--------------|------------|------------|------------|-------------|-------------------------|--------------|-------------------------|-------------------------|
| P53-2     | 14         | 77034157     | 77034157   | G          | A          | Lacc1       | nonsynonymous SNV       | 99           | 2.926                   | 2.764                   |
|           | 7          | 126993672    | 126993677  | CCT<br>CCC | -          | Mvp         | nonframeshift deletion  | 40           | 2.987                   | 3.345                   |
|           | 7          | 66888426     | 66888426   | G          | A          | Adamts17    | nonsynonymous SNV       | 28           | 3.545                   | 3.448                   |
|           | 14         | 70491354     | 70491354   | C          | T          | Bmp1        | nonsynonymous SNV       | 72           | 4.275                   | 4.213                   |
|           | 4          | 35708406     | 35708406   | C          | T          | Lingo2      | nonsynonymous SNV       | 112          | 4.715                   | 4.014                   |
|           | 19         | 13530344     | 13530344   | A          | T          | Olfr1480    | nonsynonymous SNV       | 67           | 5.071                   | 4.396                   |
|           | 6          | 142598164    | 142598164  | G          | A          | Abcc9       | nonsynonymous SNV       | 47           | 6.388                   | 6.146                   |
|           | 2          | 88767620     | 88767620   | G          | A          | Olfr1200    | nonsynonymous SNV       | 115          | 6.881                   | 5.371                   |
|           | 13         | 43668029     | 43668029   | G          | A          | Rnf182      | nonsynonymous SNV       | 17           | 13.206                  | 10.887                  |
|           | 17         | 20278821     | 20278821   | C          | A          | Vmn2r106    | nonsynonymous SNV       | 68           | 14.813                  | 10.391                  |
| P53-8     | 4          | 73403065     | 73403065   | G          | T          | Gm11487     | nonsynonymous SNV       | 238          | 2.081                   | 3.154                   |
|           | 5          | 145147854    | 145147854  | C          | G          | Bud31       | nonsynonymous SNV       | 171          | 2.453                   | 4.492                   |
|           | 1          | 186969056    | 186969056  | A          | G          | D1Pas1      | nonsynonymous SNV       | 58           | 2.62                    | 3.528                   |
|           | 14         | 35580513     | 35580513   | C          | G          | Grid1       | nonsynonymous SNV       | 52           | 3.004                   | 3.595                   |
|           | 18         | 13845409     | 13845409   | A          | G          | Zfp521      | nonsynonymous SNV       | 63           | 3.441                   | 3.245                   |
|           | 5          | 12553136     | 12553136   | T          | C          | Sema3d      | nonsynonymous SNV       | 66           | 3.629                   | 5.439                   |
|           | 11         | 70228682     | 70228682   | -          | C          | Bcl6b       | frameshift insertion    | 24           | 4.262                   | 2.511                   |
|           | 2          | 120279266    | 120279266  | C          | A          | Pla2g4d     | nonsynonymous SNV       | 44           | 4.521                   | 5.071                   |

|        |    |           |           |   |   |          |                     |     |        |        |
|--------|----|-----------|-----------|---|---|----------|---------------------|-----|--------|--------|
|        | 9  | 111366696 | 111366696 | C | G | Trank1   | nonsynonymous SNV   | 43  | 5.686  | 4.542  |
|        | 11 | 70228513  | 70228513  | C | - | Bcl6b    | frameshift deletion | 67  | 6.088  | 4.502  |
|        | 14 | 18871506  | 18871506  | G | - | Ube2e2   | frameshift deletion | 146 | 8.75   | 4.585  |
|        | 12 | 86244138  | 86244138  | C | T | Gpatch2l | nonsynonymous SNV   | 59  | 15.005 | 11.073 |
| P53-9  | 2  | 26468511  | 26468511  | G | T | Notch1   | nonsynonymous SNV   | 84  | 2.288  | 2.41   |
|        | 7  | 111508067 | 111508067 | C | T | Galnt18  | nonsynonymous SNV   | 154 | 2.974  | 2.67   |
|        | 15 | 100784858 | 100784858 | G | C | Slc4a8   | nonsynonymous SNV   | 64  | 4.168  | 3.093  |
|        | 2  | 103976193 | 103976193 | G | T | Lmo2     | nonsynonymous SNV   | 47  | 11.61  | 7.111  |
|        | 2  | 85647911  | 85647911  | A | T | Olf1002  | nonsynonymous SNV   | 82  | 12.336 | 7.013  |
|        | 13 | 27127351  | 27127351  | A | C | Prl3d2   | nonsynonymous SNV   | 99  | 14.716 | 8.014  |
|        | X  | 20670593  | 20670593  | G | C | Uba1     | nonsynonymous SNV   | 47  | 32.613 | 60     |
| VDEL-8 | X  | 43592647  | 43592647  | A | C | Tex13c1  | nonsynonymous SNV   | 14  | 2.397  | 2.404  |
|        | 14 | 96152041  | 96152041  | T | G | Klhl1    | nonsynonymous SNV   | 51  | 2.605  | 2.895  |
|        | 7  | 47427186  | 47427186  | A | C | Mrgpra2a | nonsynonymous SNV   | 67  | 2.671  | 2.72   |
|        | 5  | 25950884  | 25950884  | A | G | Gm21671  | nonsynonymous SNV   | 397 | 4.437  | 3.917  |
|        | 2  | 180595328 | 180595328 | G | A | Ogfr     | nonsynonymous SNV   | 22  | 4.542  | 3.201  |
|        | 2  | 88896904  | 88896904  | C | T | Olf1208  | nonsynonymous SNV   | 76  | 4.928  | 3.229  |
|        | 14 | 65054710  | 65054710  | C | T | Extl3    | nonsynonymous SNV   | 55  | 7.961  | 7.818  |
|        | 4  | 131793625 | 131793625 | G | T | Ptpu     | nonsynonymous SNV   | 61  | 8.347  | 7.297  |
|        | 7  | 10714842  | 10714842  | A | T | Nlrp4b   | nonsynonymous SNV   | 50  | 9.235  | 6.537  |
|        | 13 | 38955779  | 38955779  | G | A | Slc35b3  | nonsynonymous SNV   | 62  | 10.06  | 7.09   |
|        | 13 | 54683966  | 54683966  | C | T | Rnf44    | nonsynonymous SNV   | 72  | 11.72  | 8.416  |



|         |          |           |           |     |      |                                           |                        |        |        |        |
|---------|----------|-----------|-----------|-----|------|-------------------------------------------|------------------------|--------|--------|--------|
|         | X        | 20670619  | 20670621  | TTC | -    | Uba1                                      | nonframeshift deletion | 108    | 41.218 | 13.371 |
| VDEL-14 | 2        | 117153140 | 117153140 | C   | T    | Spred1                                    | nonsynonymous SNV      | 79     | 2.082  | 2.619  |
|         | 1        | 9613400   | 9613400   | G   | A    | Vxn                                       | nonsynonymous SNV      | 24     | 2.46   | 2.708  |
|         | 18       | 74218911  | 74218911  | G   | C    | Cxxc1                                     | nonsynonymous SNV      | 46     | 2.548  | 3.197  |
|         | 7        | 4340889   | 4340889   | A   | T    | Ncr1                                      | nonsynonymous SNV      | 90     | 2.576  | 2.575  |
|         | 10       | 86846917  | 86846917  | C   | G    | Stab2                                     | nonsynonymous SNV      | 38     | 3.874  | 3.899  |
|         | 11       | 85912279  | 85912279  | C   | A    | Tbx4                                      | nonsynonymous SNV      | 38     | 4.361  | 4.382  |
|         | X        | 11318582  | 11318582  | C   | G    | H2allc;H2alld;H2allf;H2allg;H2allh;H2alli | nonsynonymous SNV      | 19     | 5.145  | 4.785  |
|         | 5        | 39615100  | 39615100  | G   | A    | Hs3st1                                    | nonsynonymous SNV      | 40     | 5.334  | 4.807  |
|         | 18       | 10560455  | 10560455  | T   | C    | Greb11                                    | nonsynonymous SNV      | 48     | 7.211  | 6.663  |
|         | X        | 13290522  | 13290522  | A   | G    | Ddx3x                                     | nonsynonymous SNV      | 40     | 13.931 | 12.866 |
| X       | 20672445 | 20672445  | G         | A   | Uba1 | nonsynonymous SNV                         | 36                     | 21.798 | 60     |        |
| VDEL-15 | 2        | 26459954  | 26459954  | -   | CT   | Notch1                                    | frameshift insertion   | 94     | 4.14   | 2.633  |
| VS2-1   | 11       | 3187308   | 3187308   | G   | T    | Sfi1                                      | nonsynonymous SNV      | 1585   | 2.004  | 2.315  |
|         | 11       | 110250454 | 110250454 | C   | T    | Abca6                                     | nonsynonymous SNV      | 78     | 3.625  | 2.976  |
|         | X        | 120400453 | 120400453 | A   | -    | Pcdh11x                                   | frameshift deletion    | 30     | 4.648  | 3.728  |
|         | 11       | 119463393 | 119463393 | C   | T    | Rnf213                                    | nonsynonymous SNV      | 62     | 7.714  | 5.876  |
|         | 3        | 89141633  | 89141633  | -   | G    | Pklr                                      | frameshift insertion   | 29     | 8.139  | 4.384  |
|         | 3        | 104462752 | 104462752 | A   | G    | Lrig2                                     | nonsynonymous SNV      | 37     | 8.621  | 5.995  |
|         | 1        | 46612661  | 46612661  | G   | C    | Dnah7c                                    | nonsynonymous SNV      | 81     | 12.544 | 7.931  |
|         | 17       | 56047318  | 56047318  | C   | T    | Chaf1a                                    | nonsynonymous SNV      | 51     | 13.228 | 7.686  |

|        |    |           |           |   |   |          |                      |     |        |       |
|--------|----|-----------|-----------|---|---|----------|----------------------|-----|--------|-------|
| VS2-2  | 9  | 15997209  | 15997209  | T | A | Fat3     | nonsynonymous SNV    | 62  | 2.403  | 2.668 |
|        | 13 | 11750933  | 11750933  | T | G | Ryr2     | nonsynonymous SNV    | 78  | 4.343  | 4.264 |
|        | 8  | 43626014  | 43626014  | C | G | Adam34l  | nonsynonymous SNV    | 131 | 7.107  | 6.25  |
|        | 8  | 19064808  | 19064808  | C | A | Defb39   | nonsynonymous SNV    | 84  | 11.539 | 8.133 |
|        | 19 | 12088109  | 12088109  | C | T | Olfr1426 | nonsynonymous SNV    | 134 | 15.518 | 9.612 |
| VS2-6  | 7  | 105156863 | 105156863 | T | C | Olfr684  | nonsynonymous SNV    | 136 | 3.165  | 2.739 |
|        | 10 | 34184085  | 34184085  | - | C | Dse      | frameshift insertion | 69  | 4.125  | 2.541 |
|        | 19 | 58799897  | 58799897  | A | G | Hspa12a  | nonsynonymous SNV    | 35  | 6.358  | 5.679 |
|        | 11 | 101033964 | 101033964 | G | A | Atp6v0a1 | nonsynonymous SNV    | 55  | 12.993 | 9.709 |
| VS2-17 | 1  | 90821978  | 90821978  | A | C | Col6a3   | nonsynonymous SNV    | 73  | 2.625  | 2.469 |
|        | 1  | 54667543  | 54667543  | C | G | Ankrd44  | nonsynonymous SNV    | 66  | 2.645  | 3.205 |
|        | 4  | 100441492 | 100441492 | C | A | Ror1     | nonsynonymous SNV    | 137 | 4.726  | 3.875 |
|        | 7  | 9942330   | 9942330   | A | C | Vmn2r48  | nonsynonymous SNV    | 205 | 4.736  | 4.155 |
|        | X  | 145340757 | 145340757 | C | T | Lhfp1l   | nonsynonymous SNV    | 33  | 5.006  | 4.989 |
|        | 2  | 73363978  | 73363978  | T | C | Gpr155   | nonsynonymous SNV    | 119 | 6.231  | 5.235 |
|        | 3  | 133466879 | 133466879 | G | A | Tet2     | nonsynonymous SNV    | 83  | 8.91   | 6.342 |
|        | 6  | 88764640  | 88764640  | G | A | Mgll     | nonsynonymous SNV    | 100 | 9.32   | 6.214 |
| VDEL-4 | 12 | 75911116  | 75911116  | C | T | Syne2    | nonsynonymous SNV    | 53  | 2.566  | 3.04  |
|        | 4  | 101163673 | 101163673 | C | A | Jak1     | nonsynonymous SNV    | 44  | 2.885  | 4.522 |
|        | 7  | 50448915  | 50448915  | G | A | Nell1    | nonsynonymous SNV    | 75  | 3.932  | 3.895 |
|        | 7  | 86394962  | 86394962  | A | - | Olfr303  | frameshift deletion  | 65  | 4.14   | 2.664 |
|        | 8  | 120588767 | 120588767 | T | C | Gins2    | nonsynonymous SNV    | 51  | 6.315  | 5.09  |

|         |    |           |           |   |   |          |                     |     |        |       |
|---------|----|-----------|-----------|---|---|----------|---------------------|-----|--------|-------|
|         | 2  | 111944993 | 111944993 | C | A | Olfr1307 | nonsynonymous SNV   | 128 | 6.662  | 5.72  |
|         | 3  | 64537760  | 64537760  | G | T | Vmn2r6   | nonsynonymous SNV   | 102 | 8.069  | 6.494 |
|         | 6  | 59354651  | 59354651  | C | T | Gprin3   | nonsynonymous SNV   | 75  | 8.654  | 6.343 |
|         | 7  | 63103815  | 63103815  | G | T | Chrna7   | nonsynonymous SNV   | 84  | 12.857 | 9.407 |
| VDEL-11 | 6  | 121648151 | 121648151 | G | A | A2m      | nonsynonymous SNV   | 78  | 3.16   | 2.604 |
|         | 17 | 18304169  | 18304169  | A | - | Vmn2r93  | frameshift deletion | 95  | 3.177  | 2.245 |
|         | 7  | 120283113 | 120283113 | T | A | Abca14   | nonsynonymous SNV   | 44  | 3.889  | 3.29  |
|         | 1  | 24178311  | 24178311  | G | A | Col9a1   | nonsynonymous SNV   | 92  | 4.435  | 4.054 |
|         | 2  | 120060267 | 120060267 | G | - | Sptbn5   | frameshift deletion | 81  | 4.518  | 3.052 |
|         | 7  | 42928038  | 42928038  | A | C | Vmn2r63  | nonsynonymous SNV   | 87  | 5.115  | 3.946 |
| VS2-10  | 3  | 87088401  | 87088401  | G | A | Kirrel   | nonsynonymous SNV   | 31  | 2.031  | 3.454 |
|         | 2  | 165146713 | 165146713 | C | A | Cdh22    | nonsynonymous SNV   | 45  | 2.056  | 2.763 |
|         | 8  | 24823970  | 24823970  | A | C | Adam5    | nonsynonymous SNV   | 53  | 2.215  | 2.333 |
|         | 16 | 94268061  | 94268061  | T | A | Hlcs     | nonsynonymous SNV   | 29  | 2.363  | 2.683 |
|         | 14 | 56950203  | 56950203  | C | - | Zmym2    | frameshift deletion | 58  | 2.674  | 2.888 |
|         | 11 | 32735316  | 32735316  | C | T | Fbxw11   | nonsynonymous SNV   | 84  | 2.892  | 3.379 |
|         | 9  | 58080820  | 58080820  | C | G | Ccdc33   | nonsynonymous SNV   | 69  | 3.274  | 4.004 |
| VS2-11  | 19 | 44816000  | 44816000  | C | T | Pax2     | stopgain            | 60  | 2.195  | 2.925 |
|         | 6  | 131309960 | 131309960 | C | G | Styk1    | nonsynonymous SNV   | 75  | 2.619  | 3.456 |
|         | X  | 48547275  | 48547275  | G | A | Zfp280c  | stopgain            | 30  | 3.413  | 2.821 |
|         | X  | 13289410  | 13289410  | T | A | Ddx3x    | nonsynonymous SNV   | 89  | 3.839  | 2.891 |
|         | X  | 7706732   | 7706732   | G | T | Gpkow    | nonsynonymous SNV   | 136 | 4.403  | 2.988 |

|        |    |           |           |   |   |         |                     |     |        |        |
|--------|----|-----------|-----------|---|---|---------|---------------------|-----|--------|--------|
|        | 9  | 120955227 | 120955227 | C | G | Ctnnb1  | nonsynonymous SNV   | 92  | 5.568  | 6.473  |
|        | 9  | 7503521   | 7503521   | G | T | Mmp10   | nonsynonymous SNV   | 188 | 6.309  | 60     |
|        | 1  | 175706024 | 175706024 | T | - | Wdr64   | frameshift deletion | 75  | 6.664  | 4.081  |
| VS2-15 | 11 | 88073613  | 88073613  | C | T | VeZF1   | nonsynonymous SNV   | 99  | 3.362  | 3.95   |
|        | 17 | 40232588  | 40232588  | A | C | Crisp3  | nonsynonymous SNV   | 69  | 6.564  | 4.966  |
|        | 2  | 52242019  | 52242019  | G | A | Neb     | stopgain            | 135 | 7.086  | 60     |
|        | 17 | 53974059  | 53974059  | T | - | Sult1c1 | frameshift deletion | 100 | 10.422 | 6.329  |
| VS2-18 | 19 | 5607723   | 5607723   | C | T | Kat5    | nonsynonymous SNV   | 127 | 2.442  | 2.272  |
|        | 12 | 13583520  | 13583520  | C | T | Nbas    | nonsynonymous SNV   | 104 | 3.425  | 3.281  |
|        | 4  | 106771550 | 106771550 | C | T | Acot11  | nonsynonymous SNV   | 69  | 4.566  | 2.445  |
|        | 8  | 61393779  | 61393779  | C | T | Sh3rf1  | nonsynonymous SNV   | 41  | 4.702  | 4.051  |
|        | 11 | 75390310  | 75390310  | C | G | Smyd4   | nonsynonymous SNV   | 40  | 5.217  | 5.185  |
|        | 1  | 32520951  | 32520951  | G | T | Gm9839  | nonsynonymous SNV   | 157 | 5.865  | 5.283  |
|        | 17 | 35528160  | 35528160  | C | T | Cchr1   | nonsynonymous SNV   | 85  | 6.176  | 4.431  |
|        | 9  | 88715591  | 88715591  | C | T | Mthfsl  | nonsynonymous SNV   | 159 | 6.439  | 5.026  |
|        | 3  | 53654825  | 53654825  | C | A | Frem2   | nonsynonymous SNV   | 84  | 9.731  | 6.429  |
|        | X  | 43591275  | 43591275  | G | A | Tex13c1 | nonsynonymous SNV   | 50  | 12.928 | 13.494 |
|        | 10 | 24049962  | 24049962  | C | A | Taar7f  | nonsynonymous SNV   | 201 | 18.012 | 11.049 |
| VS2-19 | 3  | 118797433 | 118797433 | T | A | Dpyd    | nonsynonymous SNV   | 63  | 2.433  | 3.024  |
|        | X  | 141723475 | 141723475 | T | - | Irs4    | frameshift deletion | 75  | 3.11   | 2.381  |
|        | 12 | 81421328  | 81421328  | C | T | Adam4   | nonsynonymous SNV   | 110 | 3.557  | 3.334  |
|        | 1  | 3216173   | 3216173   | C | A | Xkr4    | nonsynonymous SNV   | 105 | 4.283  | 3.434  |

|  |    |           |           |   |    |         |                      |     |        |       |
|--|----|-----------|-----------|---|----|---------|----------------------|-----|--------|-------|
|  | 18 | 37011132  | 37011132  | G | A  | Pcdha11 | nonsynonymous SNV    | 565 | 8.213  | 13.61 |
|  | 7  | 104768692 | 104768692 | - | T  | Usp17le | frameshift insertion | 214 | 9.51   | 3.779 |
|  | 7  | 104769614 | 104769614 | - | GT | Usp17le | frameshift insertion | 797 | 24.857 | 7.633 |

**Supplementary Table 7: Lists of genes exhibiting chromosomal amplification or deletion.**

| <b>Amplified genes</b> |                                  |               |               |          |         |
|------------------------|----------------------------------|---------------|---------------|----------|---------|
| <b>14qE4</b>           | <b>chr14:114330002-116610000</b> |               |               |          |         |
| 1700100I10Rik          | 4930524C18Rik                    | Gpc5          | Mir20a        | Mir17    | Mir92-1 |
| 4930505G20Rik          | Mir17hg                          | Mir18         | Mir19a        | Mir19b-1 |         |
| <b>15qD1</b>           | <b>chr15:60930002-63510000</b>   |               |               |          |         |
| Myc                    | Pvt1                             | H2afy3        | D030024E09Rik | Gm20740  |         |
| <b>Deleted genes</b>   |                                  |               |               |          |         |
| <b>6qB1</b>            | <b>chr6:40950002-41610000</b>    |               |               |          |         |
| Ephb6                  | Prss3                            | Trpv6         | Try5          | Gm5409   | Gm5771  |
| Prss2                  | Try4                             | 2210010C04Rik | Prss1         | Try10    | Gm10334 |
| <b>14qC2</b>           | <b>chr14:52770002-54870000</b>   |               |               |          |         |
| Sall2                  | Olfr1508                         | Rab2b         | Olfr1511      | Tox4     |         |
| Mettl3                 | Olfr1509                         | Supt16        | Olfr1510      | Snord8   |         |
| Olfr1507               | Chd8                             | Olfr1513      | Olfr1512      |          |         |
| <b>16qA1</b>           | <b>chr16:1-16350000</b>          |               |               |          |         |
| Adcy9                  | Snai2                            | Efcab1        | Anks3         | Dnaja3   | Rbfox1  |
| Ciita                  | Snn                              | Nudt16l1      | 1700037C18Rik | Mpv17l   | Abat    |
| Cebpd                  | Tnfrsf17                         | Bfar          | 4833415N18Rik | Pdxdc1   | Gm1600  |
| Socs1                  | Tnp2                             | Nde1          | Glyr1         | Txndc11  | Tvp23a  |
| Crebbp                 | Nubp1                            | 2900011O08Rik | Parn          | Zc3h7a   | Zfp174  |
| Dnase1                 | Pla2g10                          | Pkp2          | Zfp263        | Rrn3     | Smim22  |

|        |               |               |               |          |               |
|--------|---------------|---------------|---------------|----------|---------------|
| Emp2   | Nagpa         | Nmral1        | Clec16a       | Srl      | Gm5766        |
| Grin2a | Ercc4         | Trap1         | Snx29         | Ubn1     | A630010A05Rik |
| Gspt1  | Carhsp1       | Rpl39l        | Ifitm7        | Uald1    | Sec1415       |
| Hmox2  | Slx4          | 1700123O21Rik | 4930451G09Rik | Alg1     | Mir365-1      |
| Mcm4   | Pmm2          | 1810013L24Rik | Cldn26        | Rmi2     | Mir484        |
| Mgrn1  | Mefv          | 2610020C07Rik | Naa60         | Cpped1   | Gm9961        |
| Abcc1  | Litaf         | 2310015D24Rik | Atf7ip2       | Marf1    | Gm4262        |
| Myh11  | Dexi          | Yars2         | 1700003L19Rik | Spidr    | Mir193b       |
| Ntan1  | Rogdi         | Tekt5         | 4930455F16Rik | AU021092 | Mir1945       |
| Olf15  | Fopnl         | Eef2kmt       | Pla2g10os     | Mettl22  | Gm16861       |
| Ppl    | Rsl1d1        | Ube2v2        | Cluap1        | Mk12     | Mir6365       |
| Prkdc  | Pam16         | Zfp597        | 4930562C15Rik | Vasn     |               |
| Prm1   | 3110001I22Rik | Sept12        | Coro7         | Usp7     |               |
| Prm2   | Cdip1         | Mzt2          | Tfap4         | Olf161   |               |
| Prm3   | Tmem186       | Shisa9        | Glis2         | Nlrc3    |               |

1. Subramanian A, Tamayo P, Mootha VK, et al. Gene set enrichment analysis: a knowledge-based approach for interpreting genome-wide expression profiles. *Proc Natl Acad Sci U S A*. 2005;102(43):15545-15550.
2. Mootha VK, Lindgren CM, Eriksson KF, et al. PGC-1alpha-responsive genes involved in oxidative phosphorylation are coordinately downregulated in human diabetes. *Nat Genet*. 2003;34(3):267-273.
3. Zhou Y, Zhou B, Pache L, et al. Metascape provides a biologist-oriented resource for the analysis of systems-level datasets. *Nat Commun*. 2019;10(1):1523.
4. Heavican TB, Bouska A, Yu J, et al. Genetic drivers of oncogenic pathways in molecular subgroups of peripheral T-cell lymphoma. *Blood*. 2019;133(15):1664-1676.
5. LeBlanc RE, Lefterova MI, Suarez CJ, et al. Lymph node involvement by mycosis fungoides and Sezary syndrome mimicking angioimmunoblastic T-cell lymphoma. *Hum Pathol*. 2015;46(9):1382-1389.
